# Supplementary material for: Reducing the environmental impact of large-scale photovoltaic systems through technological progress and effective management
Source: Royal Society of Chemistry journal article supplement (doi:10.1039/d4su00778f), 2025-01-01
Supplement: d4su00778f1.pdf [file d4su00778f1.pdf]

## Supporting Information for

### **Reducing the environmental impact of large-scale photovoltaic systems through technological progress and effective management**

Xingyong Li<sup>1</sup>, Fanran Meng<sup>2\*</sup>, Alan Dunbar<sup>2</sup>, Lixiao Zhang<sup>1\*</sup>, Yan Hao<sup>1</sup>, Tong He<sup>1</sup>, Na Yang<sup>1</sup>, Junnan Mao<sup>1</sup>,  
Fanxin Meng<sup>1</sup>, and Gengyuan Liu<sup>1</sup>

<sup>1</sup> State Key Joint Laboratory of Environmental Simulation and Pollution Control, School of Environment,  
Beijing Normal University, Beijing, 100875, China

<sup>2</sup> School of Chemical, Material and Biological Engineering, The University of Sheffield, Sheffield, S1 3JD,  
United Kingdom

**\*Correspondence:** [f.meng@sheffield.ac.uk](mailto:f.meng@sheffield.ac.uk); [zhanglixiao@bnu.edu.cn](mailto:zhanglixiao@bnu.edu.cn)

Total Number Pages: 90

Total Number of Figures: 7

Total Number of Tables: 38

## CONTENTS

|                                                    |           |
|----------------------------------------------------|-----------|
| <b>1 Previous LCA studies of PV systems .....</b>  | <b>6</b>  |
| <b>2 LCA Method .....</b>                          | <b>9</b>  |
| <b>2.1 System boundary.....</b>                    | <b>9</b>  |
| <b>2.2 Study area .....</b>                        | <b>10</b> |
| <b>2.3 The large-scale PV systems .....</b>        | <b>11</b> |
| <b>2.4 The detailed life cycle inventory .....</b> | <b>17</b> |
| <b>3 Results .....</b>                             | <b>60</b> |
| <b>3.1 Contribution Analysis.....</b>              | <b>60</b> |
| <b>3.2 Uncertainty Analysis.....</b>               | <b>61</b> |
| <b>3.3 Sensitivity Analysis.....</b>               | <b>63</b> |
| <b>References .....</b>                            | <b>89</b> |

## List of Figures

Fig. S1. The study area for this study. (a) The study area is situated in the Gonghe Basin of the Tibetan Plateau, China. (b) Solar irradiation data for 2019 in the Gonghe Basin, where Solar farm is located in the west-central part of the Gonghe Basin. (c) Location of six large PV systems in Solar farm.

Fig. S2. The site images of six large-scale PV systems.

Fig. S3. The manufacture processes of Mono-Si and Multi-Si PV modules.

Fig. S4. Uncertainty analysis of six large-scale PV systems. (a) Uncertainty analyses for CED and the range of EPBT and EROI values within the upper and lower ranges (2.5%~97.5%). (b) Uncertainty analysis for GHG impacts.

Fig. S5. The sensitivity analysis results on silicon wafer thickness variation for (a) GHG and (b) CED of PV module. The sensitivity analysis results on mass change of silver on PV module for (c) GHG and (d) CED of PV module.

Fig. S6. The sensitivity analysis results on mass change of low alloy steel for (a) GHG and (b) CED of mounting structure. The sensitivity analysis results on mass change of concrete for (c) GHG and (d) CED of civil works.

Fig. S7. The sensitivity analysis results on the curtailment rate for (a) GHG, (b) EPBT and EROI of PV systems lifecycle. The sensitivity analysis results on the performance ratio for (c) GHG, (d) EPBT and EROI of PV systems lifecycle.

## List of Tables

Table S1 Design, characteristics, GHG and EPBT of the large-scale PV systems in previous studies.

Table S2 The electricity generation on grid of PV systems ( $10^4$ kWh/year), with curtailment rate of 8%.

Table S3 Life cycle inventory data for P20MW2013A. P20MW2013A=the grid-connected 20MW of A PV system in 2013.

Table S4 Life cycle inventory data for P50MW2013B. P50MW2013B=the grid-connected 50MW of B PV system in 2013.

Table S5 Life cycle inventory data for P50MW2013C. P50MW2013C=the grid-connected 50MW of C PV system in 2013.

Table S6 Life cycle inventory data for P25MW2016. P25MW2016=the grid-connected 25MW of PV system in 2016.

Table S7 Life cycle inventory data for P50MW2021. P50MW2021=the grid-connected 50MW of PV system in 2021.

Table S8 Life cycle inventory data for P500MW2023+ESS. P500MW2023+ESS=the grid-connected 500MW of PV system in 2023 considering ESS.

Table S9 The PV systems equipment transportation distance and production location.

Table S10 Specifications and quantities of combiners, inverters and transformers for PV systems.

Table S11 CED (TJ/MW) during the life cycle of PV systems.

Table S12 GHG emissions ( $\text{gCO}_2\text{-eq/kWh}$ ) during the life cycle of PV systems.

Table S13 Uncertainty analysis results of CED impacts.

Table S14 Uncertainty analysis results of GHG impacts.

Table S15 The base case values of sensitivity analysis.

Table S16 Data and fitting results for sensitivity of PV module efficiency change to GHG ( $\text{gCO}_2\text{-eq/kWh}$ ) of PV systems.

Table S17 Data and fitting results for sensitivity of PV module efficiency change to EPBT (years) of PV systems.

Table S18 Data and fitting results for sensitivity of PV module efficiency change to EROI of PV systems.

Table S19 Data and fitting results for sensitivity of silicon wafer thickness variation to GHG ( $\text{gCO}_2\text{-eq/kWh}$ ) of PV modules.

Table S20 Data and fitting results for sensitivity of silicon wafer thickness variation to CED (TJ/MW) of PV

modules.

Table S21 Data and fitting results for sensitivity of silver usage variation to GHG (gCO<sub>2</sub>-eq/kWh) of PV modules.

Table S22 Data and fitting results for sensitivity of silver usage variation to CED (TJ/MW) of PV modules.

Table S23 Data and fitting results for sensitivity of low alloy steel usage variation to GHG (gCO<sub>2</sub>-eq/kWh) of Mounting Structures.

Table S24 Data and fitting results for sensitivity of low alloy steel usage variation to CED (TJ/MW) of Mounting Structures.

Table S25 Data and fitting results for sensitivity of concrete usage variation to GHG (gCO<sub>2</sub>-eq/kWh) of Civil Works.

Table S26 Data and fitting results for sensitivity of concrete usage variation to CED (TJ/MW) of Civil Works.

Table S27 Data for sensitivity of disposal scenarios to GHG (gCO<sub>2</sub>-eq/kWh) of PV Modules.

Table S28 Data for sensitivity of disposal scenarios to EPBT (years) of PV Modules.

Table S29 Data for sensitivity of disposal scenarios to EROI of PV Modules.

Table S30 Data and fitting results for sensitivity of curtailment rate variation to GHG (gCO<sub>2</sub>-eq/kWh) of PV systems.

Table S31 Data and fitting results for sensitivity of curtailment rate variation to EPBT (years) of PV systems.

Table S32 Data and fitting results for sensitivity of curtailment rate variation to EROI of PV systems.

Table S33 Data and fitting results for sensitivity of performance ratio variation to GHG (gCO<sub>2</sub>-eq/kWh) of PV systems.

Table S34 Data and fitting results for sensitivity of performance ratio variation to EPBT (years) of PV systems.

Table S35 Data and fitting results for sensitivity of performance ratio variation to EROI of PV systems.

Table S36 Data and fitting results for sensitivity of lifetime variation to GHG (gCO<sub>2</sub>-eq/kWh) of PV systems.

Table S37 Data and fitting results for sensitivity of lifetime variation to EPBT (years) of PV systems.

Table S38 Data and fitting results for sensitivity of lifetime variation to EROI of PV systems.

## 1 Previous LCA studies of PV systems

LCA studies of large PV systems from 2013 to 2023 are collated in this study, and key system parameters affecting the LCA results of large PV systems, such as annual solar radiation, installed capacity, PV module technology, module efficiency, performance ratio, and lifetime, are summarized as shown in **Table S1**. In addition, the selected LCA evaluation methods this study also collated as shown in **Table S1**. Based on the research thrust of this study, the results of previous studies on GHG impact and energy recovery capacity were also collated. (see **Table S1** and **Fig. S1**).

**Table S1 Design, characteristics, GHG and EPBT of the large-scale PV systems in previous studies.**

| NO. | References                           | Installation location | Annual solar irradiation (kWh/m <sup>2</sup> /year) | Installed Capacity (MWp) | PV Module technology | Module efficiency (%) | Performance Ratio | Lifetime (years) | LCA method                             | GHG (gCO <sub>2</sub> -eq/kWh) | EPBT (years) |
|-----|--------------------------------------|-----------------------|-----------------------------------------------------|--------------------------|----------------------|-----------------------|-------------------|------------------|----------------------------------------|--------------------------------|--------------|
| 1   | de Wild-Scholten (2013) <sup>1</sup> | Europe                | 1700                                                | 120                      | Multi-Si             | 14.10                 | 0.770             | 30               | CED V1.08                              | 27.20                          | 1.24         |
|     |                                      |                       |                                                     |                          | Mono-Si              | 14.80                 |                   |                  | IPCC 2007                              | 38.10                          | 1.96         |
| 2   | Beylot et al. (2014) <sup>2</sup>    | N/A                   | 1700                                                | 5                        | Multi-Si             | 14.00                 | 0.855             | 30               | IMPACT 2002+ v2.04                     | 37.50~53.50                    | N/A          |
| 3   | Yu and Halog (2015) <sup>3</sup>     | Australia             | N/A                                                 | 1.2                      | Multi-Si             | 14.70                 | 0.750             | 30               | CML 2000 V2.05 baseline                | 69.40                          | 2.33         |
| 4   | Ito et al. (2016) <sup>4</sup>       | Morocco               | 2344                                                | 1040                     | Mono-Si              | 15.90&21.20           | 0.810&0.830       | 30               | CED V1.08                              | 30.20~40.10                    | 1.20~1.70    |
|     |                                      | France                | 1737                                                | 1040                     |                      |                       | 0.840&0.850       |                  | IPCC 2007                              | 36.80~48.80                    | 1.50~2.00    |
| 5   | Hou et al. (2016) <sup>5</sup>       | Northwest China       | 1575                                                | N/A                      | Multi-Si             | 15.00~16.00           | 0.750             | 25               | N/A                                    | 60.13                          | 1.60         |
|     |                                      |                       |                                                     |                          | Mono-Si              | 16.00~18.00           |                   |                  |                                        | 65.20                          | 1.70         |
| 6   | Wu et al. (2017) <sup>6</sup>        | Gobi Desert of China  | 2017                                                | 1                        | Multi-Si             | 17.50                 | 0.835             | 30               | N/A                                    | 36.75                          | 2.30         |
| 7   | Yu et al. (2017) <sup>7</sup>        | Ningxia, China        | 1654                                                | 10                       | Multi-Si             | 14.08                 | 0.796             | 30               | ISCP 2010<br>IPCC 2007<br>IMPACT 2002+ | 23.62                          | 3.06         |

|    |                                                    |                     |           |       |          |             |       |    |                             |             |           |
|----|----------------------------------------------------|---------------------|-----------|-------|----------|-------------|-------|----|-----------------------------|-------------|-----------|
| 8  | Constantino et al.<br>(2018) <sup>8</sup>          | Northeast<br>Brazil | 1971      | 1.1   | Multi-Si | 14.40~16.16 | N/A   | 25 | N/A                         | 62.05~81.02 | 2.91~5.16 |
| 9  | Cromratie<br>Clemons et al.<br>(2021) <sup>9</sup> | Thailand            | 1670~1895 | 150   | Multi-Si | 13.00       | 0.800 | 30 | ReCiPe                      | 73.30       | N/A       |
| 10 | Schultz and<br>Carvalho<br>(2022) <sup>10</sup>    | Northeast<br>Brazil | 1887      | 16.4  | Mono-Si  | N/A         | 0.726 | 25 | IPCC 2013                   | 44.00       | N/A       |
| 11 | Pamponet et al.<br>(2022) <sup>11</sup>            | Brazil              | N/A       | 158   | N/A      | 16.75       | N/A   | 30 | CED V1.10<br>ReCiPe<br>2016 | 38.30~44.80 | 4.50~5.30 |
| 12 | Mohd Nordin et<br>al. (2022) <sup>12</sup>         | Malaysia            | 1958.3    | 37.57 | Multi-Si | 17.10       | 0.751 | 30 | CED V1.11<br>ReCiPe<br>2016 | 30.95       | 3.43      |

---

N/A-Not Applicable

## **2 LCA Method**

### **2.1 System boundary**

The system boundary for this study is the PV system established from cradle to grave. Firstly, it includes the mining of raw materials, transportation to the manufacturer, equipment manufacturing, and assembly. The equipment includes PV modules, BOS, and ESS. Then, it includes transportation from the production site to the PV system as well as site construction and equipment installation. Subsequently, it also includes electricity, fuel and water consumed in the operation and maintenance of the PV system. The final EoL includes equipment decommissioning and dismantling, transportation from the PV system to the disposal site, and solid waste disposal. Within the system boundary, all energy consumption and environmental impacts are considered, with the final functional unit being 1kWh of electricity generated by the PV system.

## 2.2 Study area

In this study, the study area for the six PV systems is located on the Tibetan Plateau, specifically in the Republican Basin of Qinghai, China, as shown in **Fig. S1**. The solar eco-electricity park in the Gonghe basin of Qinghai, China, has a planned installed capacity of 18.7 GW and a total area of 609.6 square kilometres. The PV park has five world's best: (1) the world's largest PV industrial park; (2) the world's largest single PV electricity station; (3) the world's largest water- solar complementary electricity station; (4) the world's largest PV electricity generation evidence base; (5) the world's largest cluster of new energy distributed phase regulators. The Gonghe region is rich in solar radiation, with a range of 4864.92–6185.55 MJ/m<sup>2</sup>.

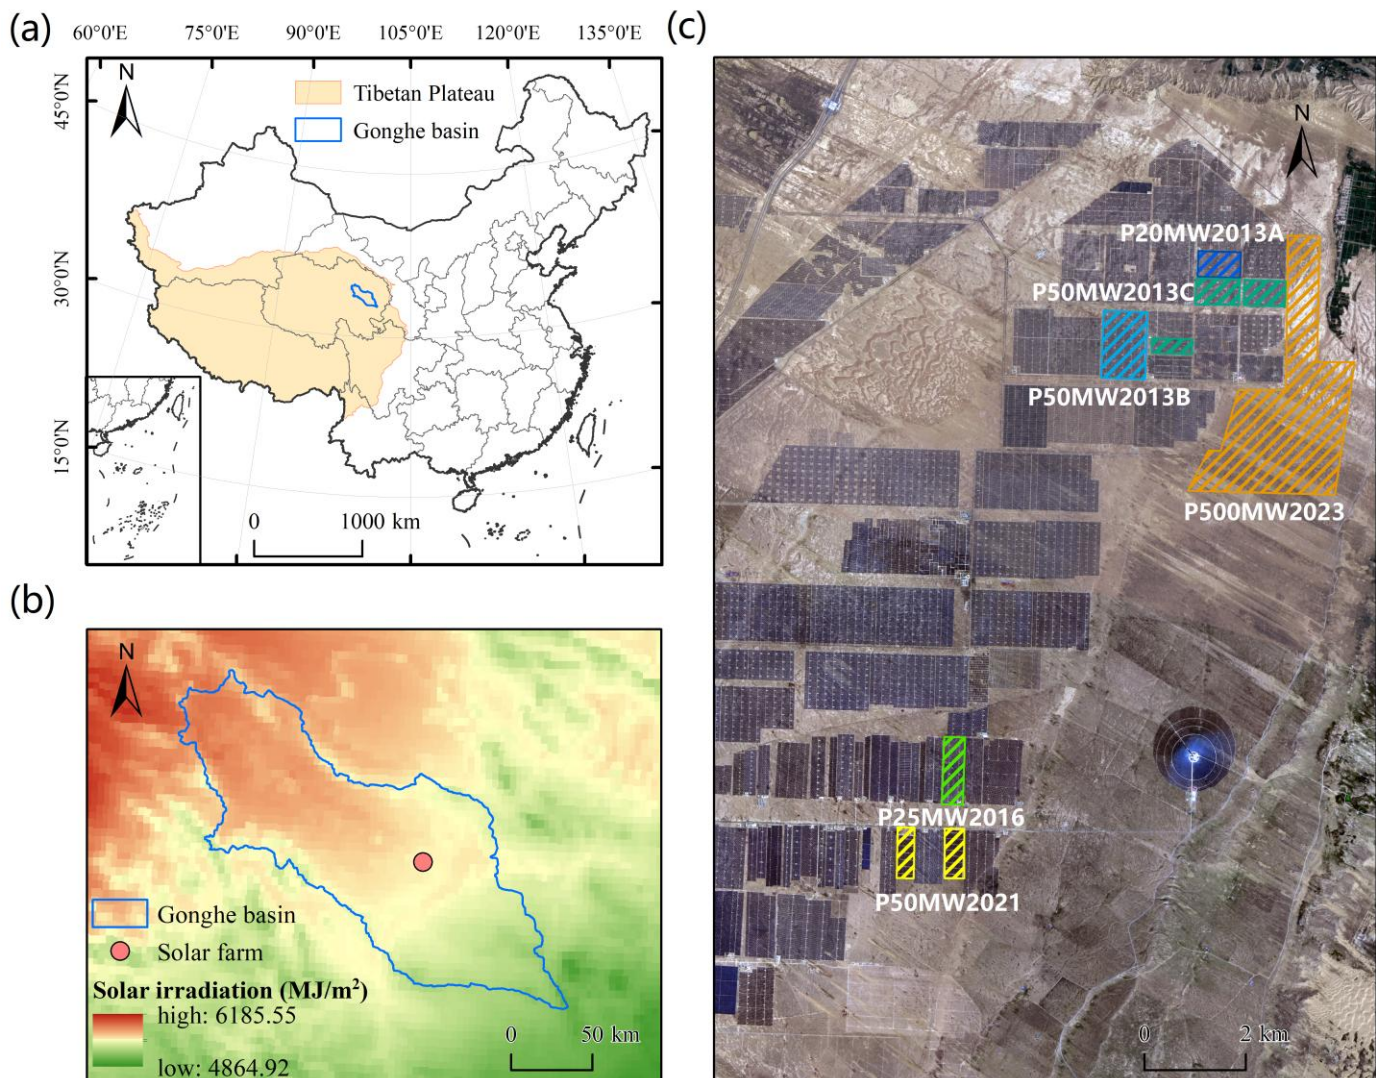

**Fig. S1.** The study area for this study. (a) The study area is situated in the Gonghe Basin of the Tibetan Plateau, China. (b) Solar irradiation data for 2019 in the Gonghe Basin, where Solar farm is located in the west-central part of the Gonghe Basin. (c) Location of six large PV systems in Solar farm.

## 2.3 The large-scale PV systems

The material composition of the PV module is shown in **Fig. 3b**. In this study, except for P500MW2023 which is a glass-glass module, all other photovoltaic systems have a glass-backsheet module<sup>13</sup>. Glass-glass module can absorb sunlight reflected from the ground and increase power generation.

In addition, the mounting structures of the six PV systems are not completely identical, as shown in **Fig. 3c**. There are fixed support bracket, fixed adjustable bracket (which can adjust four angles according to the different solar angles in different seasons), flexible bracket (which save materials), and flat single axis bracket (driven by a motor and can track the trajectory of the sun to ensure maximum received solar radiation). The on-site physical image of the PV system is shown in **Fig. S2**.

The grid connected power generation boosting process of the photovoltaic system is shown in **Fig. 3d**. The direct current (DC) electricity generated by PV modules is first converged by combiners, then converted into alternating current (AC) electricity by inverters, and finally the AC voltage is boosted up to 35kV by box transformers (integrated inverter and transformers in P50MW2021, and part of the integrated inverter and transformers in P500MW2023). The voltage is then boosted up to 110kV, 330kV (the P500MW2023 voltage is boosted directly from 35kV to 330kV) and 750kV by various transformer substations in turn, and finally delivered to the utility grid. The P500MW2023 with energy storage systems (ESS), with a specification of 150MW600MWh and a lifetime of 20 years. ESS is connected to the 35kV side of the 330kV substation, and sells 118,913.25 MWh of electricity annually.

The manufacturing processes flow of Mono-Si and Multi-Si PV modules are shown in **Fig. S3**. Mono-Si PV modules use crystal pulling process, while Multi-Si PV modules use ingot process. Other processes are the same, including silicon wafer process, cell manufacturing process and module manufacturing process.

The annual grid connected electricity generation of the six PV systems in this study over a period of 25 years is shown in **Table S2**. This study considers the degradation of PV modules, resulting in a decrease in annual electricity generation.

The selection criteria for PV systems are as follows: firstly, the technology coverage, which encompasses both polycrystalline and monocrystalline modules, with the inclusion of four types of mounting structures (fixed, fixed-adjustable, flexible and flat single axis). Secondly, authenticity, ensures that all PV systems are real and running stable PV plants, as opposed to hypothetical or simulated systems. The third criterion is comparability, which is ensured by locating all six PV systems in the world's largest Gonghe solar power park, thereby ensuring

they face the same solar radiation resources, climate, grid system, and system boundaries. The fourth and final criterion is data integrity, which is guaranteed by the use of real, first-hand data for the full lifecycle of the six PV systems, including materials, power generation, transport, and O&M data.

The primary data were validated in the following ways: firstly, information on PV modules and all other equipment materials was collated based on the feasibility investigation report, preliminary design report and project acceptance report of the PV power plants. Subsequently, through field research, we obtained first-hand data from personnel involved in power plant construction and operation and maintenance, as well as from personnel involved in the manufacturing of PV modules and equipment, and transport of equipment. This included the proportion of materials, power generation data, and the distance of equipment transport.

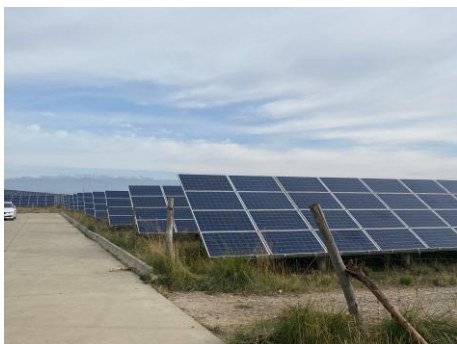

Multi-Si

P20MW2013A  
P50MW2013B  
P50MW2013C

fixed support bracket

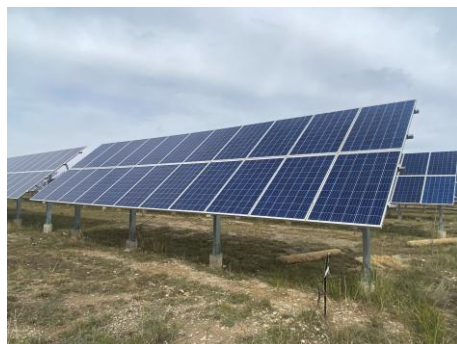

Multi-Si

P25MW2016

fixed adjustable bracket

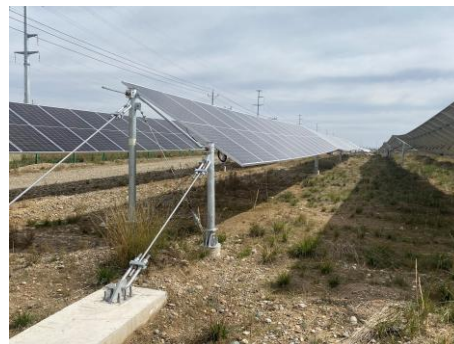

Mono-Si

P50MW2021

flexible bracket

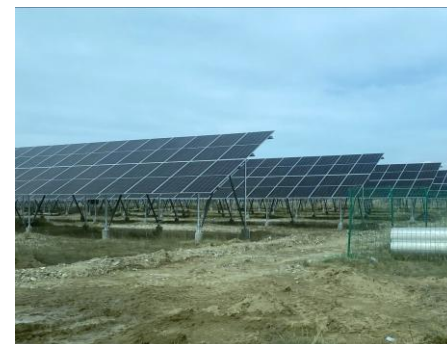

Mono-Si

P500MW2023

fixed support bracket

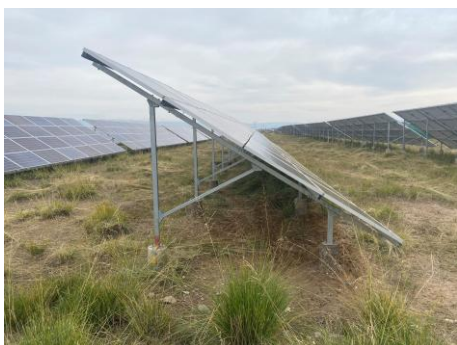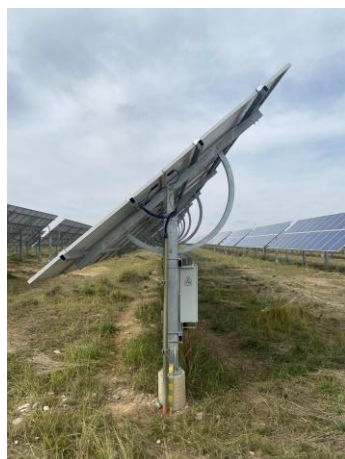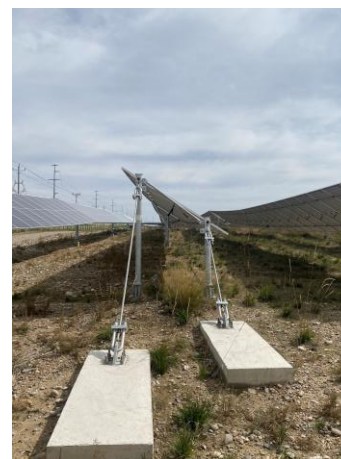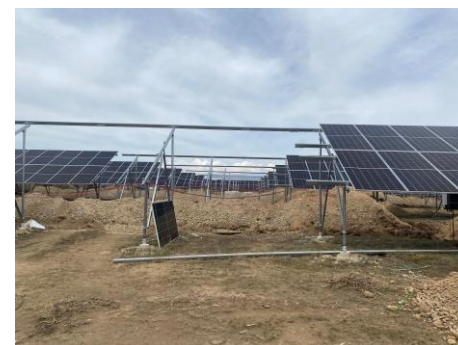

**Fig. S2.**The site images of six large-scale PV systems.

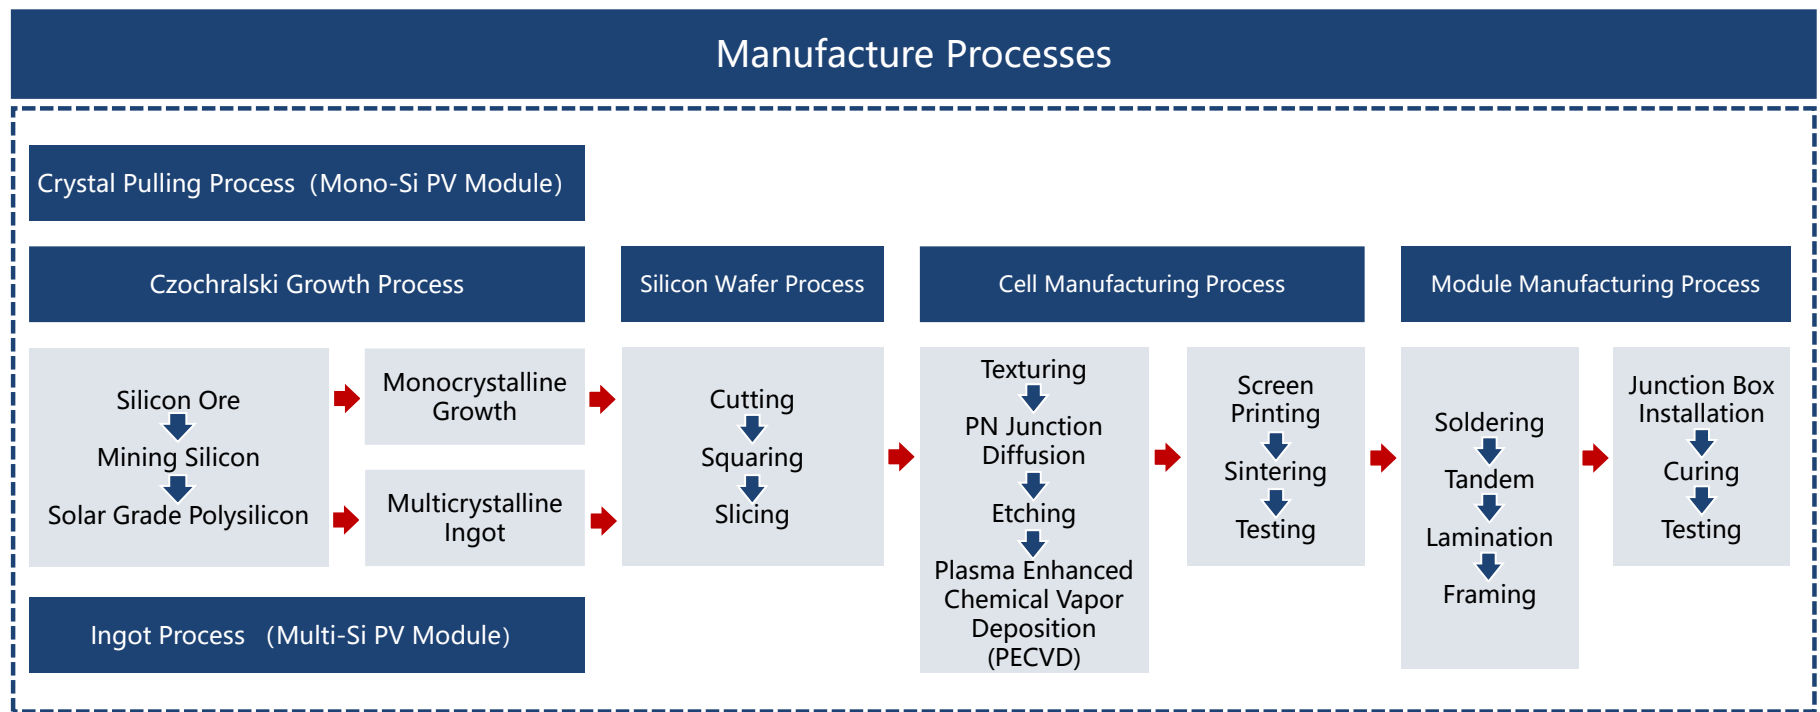

**Fig. S3. The manufacture processes of Mono-Si and Multi-Si PV modules.**

**Table S2 The electricity generation on grid of PV systems (10<sup>4</sup>kWh/year), with curtailment rate of 8%.**

| <b>PV systems<br/>Years</b> | <b>P20MW2013A</b> | <b>P50MW2013B</b> | <b>P50MW2013C</b> | <b>P25MW2016</b> | <b>P50MW2021</b> | <b>P500MW2023</b> |
|-----------------------------|-------------------|-------------------|-------------------|------------------|------------------|-------------------|
| 1                           | 3202.8052         | 8078.0140         | 8067.7192         | 4150.6720        | 8349.9844        | 107764.8440       |
| 2                           | 3170.7800         | 7996.4192         | 7986.2256         | 4099.8512        | 8303.1196        | 107270.0680       |
| 3                           | 3137.8072         | 7914.8244         | 7904.7320         | 4057.4944        | 8256.2640        | 106775.2000       |
| 4                           | 3105.1748         | 7833.2296         | 7823.2384         | 4023.6108        | 8209.3992        | 106280.3320       |
| 5                           | 3072.8736         | 7751.6348         | 7741.7448         | 3989.7272        | 8162.5344        | 105785.5560       |
| 6                           | 3046.6352         | 7670.0308         | 7660.2512         | 3955.8436        | 8115.6788        | 105290.6880       |
| 7                           | 3020.6176         | 7588.4360         | 7578.7668         | 3921.9600        | 8068.8140        | 104795.8200       |
| 8                           | 2994.8208         | 7506.8412         | 7497.2732         | 3888.0764        | 8021.9492        | 104301.0440       |
| 9                           | 2969.2448         | 7425.2464         | 7415.7796         | 3854.1928        | 7975.0844        | 103806.1760       |
| 10                          | 2943.8896         | 7343.6516         | 7334.2860         | 3820.3092        | 7928.2288        | 103311.3080       |
| 11                          | 2918.7460         | 7289.2520         | 7279.9600         | 3790.6668        | 7881.3640        | 102816.4400       |
| 12                          | 2893.8232         | 7234.8524         | 7225.6340         | 3761.0152        | 7834.4992        | 102321.6640       |
| 13                          | 2869.1028         | 7180.4620         | 7171.2988         | 3731.3728        | 7787.6436        | 101826.7960       |
| 14                          | 2844.6032         | 7126.0624         | 7116.9728         | 3701.7212        | 7740.7788        | 101331.9280       |
| 15                          | 2820.3152         | 7071.6628         | 7062.6468         | 3672.0696        | 7693.9140        | 100837.1520       |
| 16                          | 2796.2296         | 7017.2632         | 7008.3208         | 3642.4272        | 7647.0492        | 100342.2840       |
| 17                          | 2772.3464         | 6962.8636         | 6953.9948         | 3612.7756        | 7600.1936        | 99847.4160        |
| 18                          | 2748.6748         | 6908.4732         | 6899.6596         | 3583.1332        | 7553.3288        | 99352.6400        |

|         |           |           |           |           |           |             |
|---------|-----------|-----------|-----------|-----------|-----------|-------------|
| 19      | 2725.1964 | 6854.0736 | 6845.3336 | 3553.4816 | 7506.4640 | 98857.7720  |
| 20      | 2701.9204 | 6799.6740 | 6791.0076 | 3523.8392 | 7459.6084 | 98362.9040  |
| 21      | 2678.8468 | 6745.2744 | 6736.6816 | 3494.1876 | 7412.7436 | 97868.1280  |
| 22      | 2655.9756 | 6690.8840 | 6682.3464 | 3464.5360 | 7365.8788 | 97373.2600  |
| 23      | 2633.2884 | 6636.4844 | 6628.0204 | 3439.1256 | 7319.0140 | 96878.3920  |
| 24      | 2610.8036 | 6582.0848 | 6573.6944 | 3413.7152 | 7272.1584 | 96383.6160  |
| 25      | 2588.5028 | 6527.6852 | 6519.3684 | 3388.3048 | 7225.2936 | 95888.7480  |
| Average | 2876.9228 | 7229.4152 | 7220.1968 | 3741.3640 | 7787.6436 | 101826.7960 |

## 2.4 The detailed life cycle inventory

The materials and processes in the LCIs are the sum of all the components in the different stages of the life cycle, and the main components in the different stages are listed below, and some components are only available at certain PV plants. (see **Tables S3 - S8**)

### 1 PV Module

### 2 BOS

**2.1 Mounting Structure:** fixed supporting bracket (in P20MW2013A, P50MW2013B and P50MW2013C), fixed adjustable bracket (in P25MW2016), Flexible bracket (in P50MW2021), fixed supporting bracket and flat single axis bracket (in P500MW2023).

### 2.2 Combiner.

**2.3 Inverter:** the inverter of which is replaced on twice occasions during the lifetime of the PV systems.

### 2.4 Transformer.

### 2.5 Integrated Inverter and Transformer.

**2.6 Electric Transmission Line:** 1kV (35kV) electric cable, PVC pipe, steel pipe, Galvanised steel pipes, PE pipe.

**2.7 Boost Voltage Substation System:** main transformer, 35kV (0.4kV) switchgear, 330kV Electric clearance, 330Kv Voltage transformer, 35kV Static Var Generator (SVG), station transformer, earthing transformer, Grounding electrode, cable bracket, arc-suppression coil, 1kV (10kV/35kV) electric cable.

**2.8 Control and Protection System:** workstation, printer, display, 35kV protective device, 450V (750V) control cable, Grounding conductor, communication cable, measuring and control device.

### 2.9 Firefighting and Ventilation systems.

**2.10 Civil Works:** site levelling, PV array foundation, box transformer foundation, electrical substation foundation, electrical distribution foundation, office building, inverter room, water pump room, guard room, fences, gates, roads, firefighting pools and C&I.

**3 ESS:** power conversion system (Energy storage converter, step-up transformer, container), energy storage battery system (Lithium iron phosphate

Battery, battery powered cabinet, battery convergence cabinet, switchgear), energy management system (workstation, uninterruptible power supply, control cabinet), 0.4kV/35kV cable, communication cable, Grounding conductor, and Civils Works of ESS (Levelling of site, battery box foundation, PCS foundation, auxiliary room, fire pump room, prefabricated cabin foundation, fence, gates, roads).

**4 Transportation:** transport from the production site to the PV systems, and transport from the PV systems to the disposal site.

**5 O&M:** petrol (the consumption of fuel by vehicles), water (the consumption of water by the building and the cleaning PV modules), and electricity (the PV systems are supplied with electricity via the national grid, e.g. for lighting, ventilation, heating).

**6 EoL:** decommissioning and dismantling (D&D), the municipal solid waste scenario of China (MSWS of CN). This disposal scenario commences with 85% recycling rate of metals and 30% recycling rate of plastics (including ferro metals, aluminium, steel, plastics, PE, PET, PP, PS, PVC), followed by proportional incineration of the remaining material, and finally landfilling and open dumping of the separated material.

As shown in **Table S9**, the transportation distance in LCIs is the actual transportation distance we surveyed from PV plants operators and equipment manufacturers. And when the PV system is retired, all equipment will be returned to its original path for safe recycling and disposal by the equipment manufacturers. **Table S10** shows the actual specifications and quantities of the current collection box, inverter, and transformer in LCIs.

**Table S3 Life cycle inventory data for P20MW2013A. P20MW2013A=the grid-connected 20MW of A PV system in 2013.**

| P20MW2013A                    |                                                                                                    |         |                |           |
|-------------------------------|----------------------------------------------------------------------------------------------------|---------|----------------|-----------|
| Assembly                      | Materials/Processes                                                                                | Amount  | Unit           | Source    |
| <b>1. PV Module</b>           |                                                                                                    |         |                |           |
|                               | Photovoltaic cell, multi-Si wafer {GLO}  market for photovoltaic cell, multi-Si wafer   Cut-off, U | 69996   | m <sup>2</sup> | Primary   |
|                               | Silver {GLO}  market for silver   Cut-off, U                                                       | 2410    | kg             | data and  |
|                               | Aluminium alloy, AlMg3 {GLO}  market for aluminium alloy, AlMg3   Cut-off, U                       | 141880  | kg             | Ecoinvent |
|                               | Solar glass, low-iron {GLO}  market for solar glass, low-iron   Cut-off, U                         | 1184694 | kg             | 3.9.1     |
|                               | Polyvinylfluoride {GLO}  market for polyvinylfluoride   Cut-off, U                                 | 60416   | kg             |           |
|                               | Ethylvinylacetate, foil {GLO}  market for ethylvinylacetate, foil   Cut-off, U                     | 113440  | kg             |           |
|                               | Silicone product {GLO}  market for   Cut-off, U                                                    | 1446    | kg             |           |
|                               | Polyphenylene sulfide {GLO}  market for polyphenylene sulfide   Cut-off, U                         | 41336   | kg             |           |
|                               | Copper {GLO}  market for copper   Cut-off, U                                                       | 26356   | kg             |           |
|                               | Tin {GLO}  market for tin   Cut-off, U                                                             | 2410    | kg             |           |
|                               | Electricity, low voltage {CN}  market for   Cut-off, U                                             | 803504  | kWh            |           |
| <b>2. Balance of System</b>   |                                                                                                    |         |                |           |
| <b>2.1 Mounting Structure</b> |                                                                                                    |         |                |           |
|                               | Steel, low-alloyed {GLO}  market for steel, low-alloyed   Cut-off, U                               | 1355284 | kg             | Primary   |
|                               | Forging, steel {GLO}  market for forging, steel   Cut-off, U                                       | 1355284 | kg             | data and  |
|                               | Zinc coat, pieces {GLO}  market for zinc coat, pieces   Cut-off, U                                 | 19020   | m <sup>2</sup> | Ecoinvent |
|                               |                                                                                                    |         |                | 3.9.1     |

---

## 2.2 Combiner

|                                                                          |      |    |           |
|--------------------------------------------------------------------------|------|----|-----------|
| Copper {GLO}  market for copper   Cut-off, U                             | 8000 | kg | Primary   |
| Cast iron {GLO}  market for cast iron   Cut-off, U                       | 1600 | kg | data and  |
| Steel, low-alloyed {GLO}  market for steel, low-alloyed   Cut-off, U     | 6400 | kg | Ecoinvent |
| Wire drawing, copper {GLO}  market for wire drawing, copper   Cut-off, U | 8000 | kg | 3.9.1     |
| Sheet rolling, steel {GLO}  market for sheet rolling, steel   Cut-off, U | 6400 | kg |           |

## 2.3 Inverter

|                                                                          |        |    |           |
|--------------------------------------------------------------------------|--------|----|-----------|
| Copper {GLO}  market for copper   Cut-off, U                             | 60512  | kg | Primary   |
| Cast iron {GLO}  market for cast iron   Cut-off, U                       | 87968  | kg | data and  |
| Steel, low-alloyed {GLO}  market for steel, low-alloyed   Cut-off, U     | 154080 | kg | Ecoinvent |
| Wire drawing, copper {GLO}  market for wire drawing, copper   Cut-off, U | 60512  | kg | 3.9.1     |
| Sheet rolling, steel {GLO}  market for sheet rolling, steel   Cut-off, U | 154080 | kg |           |

## 2.4 Transformer

|                                                                                          |       |    |           |
|------------------------------------------------------------------------------------------|-------|----|-----------|
| Cast iron {GLO}  market for cast iron   Cut-off, U                                       | 42560 | kg | Primary   |
| Silicon, metallurgical grade {GLO}  market for silicon, metallurgical grade   Cut-off, U | 2240  | kg | data and  |
| Copper {GLO}  market for copper   Cut-off, U                                             | 33600 | kg | Ecoinvent |
| Steel, low-alloyed {GLO}  market for steel, low-alloyed   Cut-off, U                     | 28000 | kg | 3.9.1     |
| Aluminium, wrought alloy {GLO}  market for aluminium, wrought alloy   Cut-off, U         | 5600  | kg |           |
| Wire drawing, copper {GLO}  market for wire drawing, copper   Cut-off, U                 | 33600 | kg |           |
| Sheet rolling, steel {GLO}  market for sheet rolling, steel   Cut-off, U                 | 28000 | kg |           |
| Sheet rolling, aluminium {GLO}  market for sheet rolling, aluminium   Cut-off, U         | 5600  | kg |           |

---

---

## 2.5 Electric Transmission Line

|                                                                                                        |        |    |           |
|--------------------------------------------------------------------------------------------------------|--------|----|-----------|
| Cable, unspecified {GLO}  market for cable, unspecified   Cut-off, U                                   | 179010 | kg | Primary   |
| Polyvinylchloride, bulk polymerised {GLO}  market for polyvinylchloride, bulk polymerised   Cut-off, U | 4544   | kg | data and  |
| Steel, low-alloyed {GLO}  market for steel, low-alloyed   Cut-off, U                                   | 107844 | kg | Ecoinvent |
| Sheet rolling, steel {GLO}  market for sheet rolling, steel   Cut-off, U                               | 107844 | kg | 3.9.1     |

## 2.6 Boost Voltage Substation System

|                                                                                          |       |    |           |
|------------------------------------------------------------------------------------------|-------|----|-----------|
| Steel, low-alloyed {GLO}  market for steel, low-alloyed   Cut-off, U                     | 13105 | kg | Primary   |
| Cast iron {GLO}  market for cast iron   Cut-off, U                                       | 6352  | kg | data and  |
| Copper {GLO}  market for copper   Cut-off, U                                             | 6055  | kg | Ecoinvent |
| Aluminium, wrought alloy {GLO}  market for aluminium, wrought alloy   Cut-off, U         | 1170  | kg | 3.9.1     |
| Silicon, metallurgical grade {GLO}  market for silicon, metallurgical grade   Cut-off, U | 468   | kg |           |
| Silver {GLO}  market for silver   Cut-off, U                                             | 105   | kg |           |
| Polypropylene, granulate {GLO}  market for polypropylene, granulate   Cut-off, U         | 700   | kg |           |
| Polycarbonate {GLO}  market for polycarbonate   Cut-off, U                               | 245   | kg |           |
| Cable, unspecified {GLO}  market for cable, unspecified   Cut-off, U                     | 29404 | kg |           |
| Sheet rolling, steel {GLO}  market for sheet rolling, steel   Cut-off, U                 | 13105 | kg |           |
| Wire drawing, copper {GLO}  market for wire drawing, copper   Cut-off, U                 | 6055  | kg |           |
| Sheet rolling, aluminium {GLO}  market for sheet rolling, aluminium   Cut-off, U         | 1170  | kg |           |

## 2.7 Control and Protection System

|                                                                                                      |   |   |          |
|------------------------------------------------------------------------------------------------------|---|---|----------|
| Computer, desktop, without screen {GLO}  market for computer, desktop, without screen   Cut-off, U   | 3 | p | Primary  |
| Display, liquid crystal, 17 inches {GLO}  market for display, liquid crystal, 17 inches   Cut-off, U | 3 | p | data and |

---

|                                                                                          |       |    |           |
|------------------------------------------------------------------------------------------|-------|----|-----------|
| Printer, laser, colour {GLO}  market for printer, laser, colour   Cut-off, U             | 2     | p  | Ecoinvent |
| Steel, low-alloyed {GLO}  market for steel, low-alloyed   Cut-off, U                     | 7965  | kg | 3.9.1     |
| Copper {GLO}  market for copper   Cut-off, U                                             | 4720  | kg |           |
| Aluminium, wrought alloy {GLO}  market for aluminium, wrought alloy   Cut-off, U         | 2976  | kg |           |
| Cast iron {GLO}  market for cast iron   Cut-off, U                                       | 1995  | kg |           |
| Polycarbonate {GLO}  market for polycarbonate   Cut-off, U                               | 1822  | kg |           |
| Silicon, metallurgical grade {GLO}  market for silicon, metallurgical grade   Cut-off, U | 722   | kg |           |
| Cable, unspecified {GLO}  market for cable, unspecified   Cut-off, U                     | 10875 | kg |           |
| Sheet rolling, steel {GLO}  market for sheet rolling, steel   Cut-off, U                 | 7965  | kg |           |
| Wire drawing, copper {GLO}  market for wire drawing, copper   Cut-off, U                 | 4720  | kg |           |
| Sheet rolling, aluminium {GLO}  market for sheet rolling, aluminium   Cut-off, U         | 2976  | kg |           |

## 2.8 Firefighting and Ventilation systems

|                                                                                      |       |    |           |
|--------------------------------------------------------------------------------------|-------|----|-----------|
| Steel, low-alloyed {GLO}  market for steel, low-alloyed   Cut-off, U                 | 77819 | kg | Primary   |
| Copper {GLO}  market for copper   Cut-off, U                                         | 100   | kg | data and  |
| Aluminium, wrought alloy {GLO}  market for aluminium, wrought alloy   Cut-off, U     | 50    | kg | Ecoinvent |
| Steel, chromium steel 18/8 {GLO}  market for steel, chromium steel 18/8   Cut-off, U | 1600  | kg | 3.9.1     |
| Cast iron {GLO}  market for cast iron   Cut-off, U                                   | 400   | kg |           |
| Cable, unspecified {GLO}  market for cable, unspecified   Cut-off, U                 | 1470  | kg |           |
| Sheet rolling, steel {GLO}  market for sheet rolling, steel   Cut-off, U             | 77819 | kg |           |
| Wire drawing, copper {GLO}  market for wire drawing, copper   Cut-off, U             | 100   | kg |           |
| Sheet rolling, aluminium {GLO}  market for sheet rolling, aluminium   Cut-off, U     | 50    | kg |           |

|                                                                                                                                |          |                |           |
|--------------------------------------------------------------------------------------------------------------------------------|----------|----------------|-----------|
| Sheet rolling, chromium steel {GLO}  market for sheet rolling, chromium steel   Cut-off, U                                     | 1600     | kg             |           |
| <b>2.9 Civil Works</b>                                                                                                         |          |                |           |
| Concrete, 25MPa {GLO}  market for concrete, 25MPa   Cut-off, U                                                                 | 3950     | m <sup>3</sup> | Primary   |
| Reinforcing steel {GLO}  market for reinforcing steel   Cut-off, U                                                             | 433550   | kg             | data and  |
| Concrete, 20MPa {GLO}  market for concrete, 20MPa   Cut-off, U                                                                 | 830      | m <sup>3</sup> | Ecoinvent |
| Brick {GLO}  market for   Cut-off, U                                                                                           | 4973200  | kg             | 3.9.1     |
| Concrete, 30-32MPa {GLO}  market for concrete, 30-32MPa   Cut-off, U                                                           | 525.8    | m <sup>3</sup> |           |
| Steel, low-alloyed {GLO}  market for steel, low-alloyed   Cut-off, U                                                           | 140910   | kg             |           |
| Copper {GLO}  market for copper   Cut-off, U                                                                                   | 600      | kg             |           |
| Aluminium, wrought alloy {GLO}  market for aluminium, wrought alloy   Cut-off, U                                               | 150      | kg             |           |
| Gravel, crushed {GLO}  market for   Cut-off, U                                                                                 | 16187220 | kg             |           |
| Sheet rolling, steel {GLO}  market for sheet rolling, steel   Cut-off, U                                                       | 140910   | kg             |           |
| Wire drawing, copper {GLO}  market for wire drawing, copper   Cut-off, U                                                       | 600      | kg             |           |
| Sheet rolling, aluminium {GLO}  market for sheet rolling, aluminium   Cut-off, U                                               | 150      | kg             |           |
| <b>2.9.1 Construction &amp; Installation</b>                                                                                   |          |                |           |
| Diesel, burned in building machine {GLO}  diesel, burned in building machine   Cut-off, U                                      | 2385600  | MJ             | Primary   |
| Tap water {GLO}  market group for tap water   Cut-off, U                                                                       | 8640000  | kg             | data and  |
| Petrol, unleaded, burned in machinery {GLO}  market for petrol, unleaded, burned in machinery   Cut-off, U                     | 368000   | MJ             | Ecoinvent |
| Electricity, low voltage {CN}  market for   Cut-off, U                                                                         | 91000    | kWh            | 3.9.1     |
| <b>3. Transportation</b>                                                                                                       |          |                |           |
| Transport, freight, lorry >32 metric ton, EURO3 {RoW}  market for transport, freight, lorry >32 metric ton, EURO3   Cut-off, U | 6275181  | tkm            | Primary   |

---

|                                                                                                                                |         |     |           |
|--------------------------------------------------------------------------------------------------------------------------------|---------|-----|-----------|
| Transport, freight, lorry >32 metric ton, EURO3 {RoW}  market for transport, freight, lorry >32 metric ton, EURO3   Cut-off, U | 6080934 | tkm | data and  |
|                                                                                                                                |         |     | Ecoinvent |
|                                                                                                                                |         |     | 3.9.1     |

#### 4. Operation & Maintenance

|                                                                                                            |           |     |           |
|------------------------------------------------------------------------------------------------------------|-----------|-----|-----------|
| Petrol, unleaded, burned in machinery {GLO}  market for petrol, unleaded, burned in machinery   Cut-off, U | 5347500   | MJ  | Primary   |
| Tap water {GLO}  market group for tap water   Cut-off, U                                                   | 112500000 | kg  | data and  |
| Electricity, low voltage {CN}  market for   Cut-off, U                                                     | 3872500   | kWh | Ecoinvent |
|                                                                                                            |           |     | 3.9.1     |

#### 5. End of Life

|                                                                              |     |   |           |
|------------------------------------------------------------------------------|-----|---|-----------|
| Municipal solid waste (waste scenario) {CN}  Treatment of waste   Cut-off, U | 100 | % | Ecoinvent |
|                                                                              |     |   | 3.9.1     |

#### 5.1 Decommissioning & Dismantling

|                                                                                                            |         |     |           |
|------------------------------------------------------------------------------------------------------------|---------|-----|-----------|
| Diesel, burned in building machine {GLO}  diesel, burned in building machine   Cut-off, U                  | 2385600 | MJ  | Primary   |
| Petrol, unleaded, burned in machinery {GLO}  market for petrol, unleaded, burned in machinery   Cut-off, U | 368000  | MJ  | data and  |
| Electricity, low voltage {CN}  market for   Cut-off, U                                                     | 91000   | kWh | Ecoinvent |
|                                                                                                            |         |     | 3.9.1     |

---

**Table S4 Life cycle inventory data for P50MW2013B. P50MW2013B=the grid-connected 50MW of B PV system in 2013.**

| P50MW2013B                    |                                                                                                    |           |                |           |
|-------------------------------|----------------------------------------------------------------------------------------------------|-----------|----------------|-----------|
| Assembly                      | Materials/Processes                                                                                | Amount    | Unit           | Source    |
| <b>1. PV Module</b>           |                                                                                                    |           |                |           |
|                               | Photovoltaic cell, multi-Si wafer {GLO}  market for photovoltaic cell, multi-Si wafer   Cut-off, U | 175893    | m <sup>2</sup> | Primary   |
|                               | Silver {GLO}  market for silver   Cut-off, U                                                       | 6057      | kg             | data and  |
|                               | Aluminium alloy, AlMg3 {GLO}  market for aluminium alloy, AlMg3   Cut-off, U                       | 356533    | kg             | Ecoinvent |
|                               | Solar glass, low-iron {GLO}  market for solar glass, low-iron   Cut-off, U                         | 2977031   | kg             | 3.9.1     |
|                               | Polyvinylfluoride {GLO}  market for polyvinylfluoride   Cut-off, U                                 | 151819    | kg             |           |
|                               | Ethylvinylacetate, foil {GLO}  market for ethylvinylacetate, foil   Cut-off, U                     | 285065    | kg             |           |
|                               | Silicone product {GLO}  market for   Cut-off, U                                                    | 3633.9732 | kg             |           |
|                               | Polyphenylene sulfide {GLO}  market for polyphenylene sulfide   Cut-off, U                         | 103958    | kg             |           |
|                               | Copper {GLO}  market for copper   Cut-off, U                                                       | 66568     | kg             |           |
|                               | Tin {GLO}  market for tin   Cut-off, U                                                             | 6057      | kg             |           |
|                               | Electricity, low voltage {CN}  market for   Cut-off, U                                             | 2019345   | kWh            |           |
| <b>2. Balance of System</b>   |                                                                                                    |           |                |           |
| <b>2.1 Mounting Structure</b> |                                                                                                    |           |                |           |
|                               | Steel, low-alloyed {GLO}  market for steel, low-alloyed   Cut-off, U                               | 3388210   | kg             | Primary   |
|                               | Forging, steel {GLO}  market for forging, steel   Cut-off, U                                       | 3388210   | kg             | data and  |
|                               | Zinc coat, pieces {GLO}  market for zinc coat, pieces   Cut-off, U                                 | 47549     | m <sup>2</sup> | Ecoinvent |
|                               |                                                                                                    |           |                | 3.9.1     |

---

## 2.2 Combiner

|                                                                          |       |    |           |
|--------------------------------------------------------------------------|-------|----|-----------|
| Copper {GLO}  market for copper   Cut-off, U                             | 17500 | kg | Primary   |
| Cast iron {GLO}  market for cast iron   Cut-off, U                       | 3500  | kg | data and  |
| Steel, low-alloyed {GLO}  market for steel, low-alloyed   Cut-off, U     | 14000 | kg | Ecoinvent |
| Wire drawing, copper {GLO}  market for wire drawing, copper   Cut-off, U | 17500 | kg | 3.9.1     |
| Sheet rolling, steel {GLO}  market for sheet rolling, steel   Cut-off, U | 14000 | kg |           |

## 2.3 Inverter

|                                                                          |        |    |           |
|--------------------------------------------------------------------------|--------|----|-----------|
| Copper {GLO}  market for copper   Cut-off, U                             | 151280 | kg | Primary   |
| Cast iron {GLO}  market for cast iron   Cut-off, U                       | 219920 | kg | data and  |
| Steel, low-alloyed {GLO}  market for steel, low-alloyed   Cut-off, U     | 385200 | kg | Ecoinvent |
| Wire drawing, copper {GLO}  market for wire drawing, copper   Cut-off, U | 151280 | kg | 3.9.1     |
| Sheet rolling, steel {GLO}  market for sheet rolling, steel   Cut-off, U | 385200 | kg |           |

## 2.4 Transformer

|                                                                                          |        |    |           |
|------------------------------------------------------------------------------------------|--------|----|-----------|
| Cast iron {GLO}  market for cast iron   Cut-off, U                                       | 106400 | kg | Primary   |
| Silicon, metallurgical grade {GLO}  market for silicon, metallurgical grade   Cut-off, U | 5600   | kg | data and  |
| Copper {GLO}  market for copper   Cut-off, U                                             | 84000  | kg | Ecoinvent |
| Steel, low-alloyed {GLO}  market for steel, low-alloyed   Cut-off, U                     | 70000  | kg | 3.9.1     |
| Aluminium, wrought alloy {GLO}  market for aluminium, wrought alloy   Cut-off, U         | 14000  | kg |           |
| Wire drawing, copper {GLO}  market for wire drawing, copper   Cut-off, U                 | 84000  | kg |           |
| Sheet rolling, steel {GLO}  market for sheet rolling, steel   Cut-off, U                 | 70000  | kg |           |
| Sheet rolling, aluminium {GLO}  market for sheet rolling, aluminium   Cut-off, U         | 14000  | kg |           |

---

---

## 2.5 Electric Transmission Line

|                                                                                                        |        |    |           |
|--------------------------------------------------------------------------------------------------------|--------|----|-----------|
| Cable, unspecified {GLO}  market for cable, unspecified   Cut-off, U                                   | 445318 | kg | Primary   |
| Polyvinylchloride, bulk polymerised {GLO}  market for polyvinylchloride, bulk polymerised   Cut-off, U | 12353  | kg | data and  |
| Steel, low-alloyed {GLO}  market for steel, low-alloyed   Cut-off, U                                   | 323532 | kg | Ecoinvent |
| Sheet rolling, steel {GLO}  market for sheet rolling, steel   Cut-off, U                               | 323532 | kg | 3.9.1     |

## 2.6 Boost Voltage Substation System

|                                                                                          |       |    |           |
|------------------------------------------------------------------------------------------|-------|----|-----------|
| Steel, low-alloyed {GLO}  market for steel, low-alloyed   Cut-off, U                     | 15320 | kg | Primary   |
| Cast iron {GLO}  market for cast iron   Cut-off, U                                       | 7646  | kg | data and  |
| Copper {GLO}  market for copper   Cut-off, U                                             | 7675  | kg | Ecoinvent |
| Aluminium, wrought alloy {GLO}  market for aluminium, wrought alloy   Cut-off, U         | 2935  | kg | 3.9.1     |
| Silicon, metallurgical grade {GLO}  market for silicon, metallurgical grade   Cut-off, U | 1174  | kg |           |
| Silver {GLO}  market for silver   Cut-off, U                                             | 315   | kg |           |
| Polypropylene, granulate {GLO}  market for polypropylene, granulate   Cut-off, U         | 2100  | kg |           |
| Polycarbonate {GLO}  market for polycarbonate   Cut-off, U                               | 735   | kg |           |
| Cable, unspecified {GLO}  market for cable, unspecified   Cut-off, U                     | 26679 | kg |           |
| Sheet rolling, steel {GLO}  market for sheet rolling, steel   Cut-off, U                 | 15320 | kg |           |
| Wire drawing, copper {GLO}  market for wire drawing, copper   Cut-off, U                 | 7675  | kg |           |
| Sheet rolling, aluminium {GLO}  market for sheet rolling, aluminium   Cut-off, U         | 2935  | kg |           |

## 2.7 Control and Protection System

|                                                                                                      |   |   |          |
|------------------------------------------------------------------------------------------------------|---|---|----------|
| Computer, desktop, without screen {GLO}  market for computer, desktop, without screen   Cut-off, U   | 3 | p | Primary  |
| Display, liquid crystal, 17 inches {GLO}  market for display, liquid crystal, 17 inches   Cut-off, U | 3 | p | data and |

---

|                                                                                          |       |    |           |
|------------------------------------------------------------------------------------------|-------|----|-----------|
| Printer, laser, colour {GLO}  market for printer, laser, colour   Cut-off, U             | 2     | p  | Ecoinvent |
| Steel, low-alloyed {GLO}  market for steel, low-alloyed   Cut-off, U                     | 14637 | kg | 3.9.1     |
| Copper {GLO}  market for copper   Cut-off, U                                             | 8332  | kg |           |
| Aluminium, wrought alloy {GLO}  market for aluminium, wrought alloy   Cut-off, U         | 5112  | kg |           |
| Cast iron {GLO}  market for cast iron   Cut-off, U                                       | 3147  | kg |           |
| Polycarbonate {GLO}  market for polycarbonate   Cut-off, U                               | 3274  | kg |           |
| Silicon, metallurgical grade {GLO}  market for silicon, metallurgical grade   Cut-off, U | 1298  | kg |           |
| Cable, unspecified {GLO}  market for cable, unspecified   Cut-off, U                     | 20673 | kg |           |
| Sheet rolling, steel {GLO}  market for sheet rolling, steel   Cut-off, U                 | 14637 | kg |           |
| Wire drawing, copper {GLO}  market for wire drawing, copper   Cut-off, U                 | 8332  | kg |           |
| Sheet rolling, aluminium {GLO}  market for sheet rolling, aluminium   Cut-off, U         | 5112  | kg |           |

## 2.8 Firefighting and Ventilation systems

|                                                                                      |        |    |           |
|--------------------------------------------------------------------------------------|--------|----|-----------|
| Steel, low-alloyed {GLO}  market for steel, low-alloyed   Cut-off, U                 | 109530 | kg | Primary   |
| Copper {GLO}  market for copper   Cut-off, U                                         | 800    | kg | data and  |
| Aluminium, wrought alloy {GLO}  market for aluminium, wrought alloy   Cut-off, U     | 400    | kg | Ecoinvent |
| Steel, chromium steel 18/8 {GLO}  market for steel, chromium steel 18/8   Cut-off, U | 1600   | kg | 3.9.1     |
| Cast iron {GLO}  market for cast iron   Cut-off, U                                   | 400    | kg |           |
| Cable, unspecified {GLO}  market for cable, unspecified   Cut-off, U                 | 2669   | kg |           |
| Sheet rolling, steel {GLO}  market for sheet rolling, steel   Cut-off, U             | 109530 | kg |           |
| Wire drawing, copper {GLO}  market for wire drawing, copper   Cut-off, U             | 800    | kg |           |
| Sheet rolling, aluminium {GLO}  market for sheet rolling, aluminium   Cut-off, U     | 400    | kg |           |

|                                                                                                                                |          |                |           |
|--------------------------------------------------------------------------------------------------------------------------------|----------|----------------|-----------|
| Sheet rolling, chromium steel {GLO}  market for sheet rolling, chromium steel   Cut-off, U                                     | 1600     | kg             |           |
| <b>2.9 Civil Works</b>                                                                                                         |          |                |           |
| Concrete, 25MPa {GLO}  market for concrete, 25MPa   Cut-off, U                                                                 | 9900     | m <sup>3</sup> | Primary   |
| Reinforcing steel {GLO}  market for reinforcing steel   Cut-off, U                                                             | 1050550  | kg             | data and  |
| Concrete, 20MPa {GLO}  market for concrete, 20MPa   Cut-off, U                                                                 | 657      | m <sup>3</sup> | Ecoinvent |
| Brick {GLO}  market for   Cut-off, U                                                                                           | 8391880  | kg             | 3.9.1     |
| Concrete, 30-32MPa {GLO}  market for concrete, 30-32MPa   Cut-off, U                                                           | 877      | m <sup>3</sup> |           |
| Steel, low-alloyed {GLO}  market for steel, low-alloyed   Cut-off, U                                                           | 910      | kg             |           |
| Copper {GLO}  market for copper   Cut-off, U                                                                                   | 600      | kg             |           |
| Aluminium, wrought alloy {GLO}  market for aluminium, wrought alloy   Cut-off, U                                               | 150      | kg             |           |
| Gravel, crushed {GLO}  market for   Cut-off, U                                                                                 | 19798800 | kg             |           |
| Sheet rolling, steel {GLO}  market for sheet rolling, steel   Cut-off, U                                                       | 910      | kg             |           |
| Wire drawing, copper {GLO}  market for wire drawing, copper   Cut-off, U                                                       | 600      | kg             |           |
| Sheet rolling, aluminium {GLO}  market for sheet rolling, aluminium   Cut-off, U                                               | 150      | kg             |           |
| <b>2.9.1 Construction &amp; Installation</b>                                                                                   |          |                |           |
| Diesel, burned in building machine {GLO}  diesel, burned in building machine   Cut-off, U                                      | 5964000  | MJ             | Primary   |
| Tap water {GLO}  market group for tap water   Cut-off, U                                                                       | 21600000 | kg             | data and  |
| Petrol, unleaded, burned in machinery {GLO}  market for petrol, unleaded, burned in machinery   Cut-off, U                     | 920000   | MJ             | Ecoinvent |
| Electricity, low voltage {CN}  market for   Cut-off, U                                                                         | 277000   | kWh            | 3.9.1     |
| <b>3. Transportation</b>                                                                                                       |          |                |           |
| Transport, freight, lorry >32 metric ton, EURO3 {RoW}  market for transport, freight, lorry >32 metric ton, EURO3   Cut-off, U | 15425366 | tkm            | Primary   |

---

|                                                                                                                                |          |     |           |     |
|--------------------------------------------------------------------------------------------------------------------------------|----------|-----|-----------|-----|
| Transport, freight, lorry >32 metric ton, EURO3 {RoW}  market for transport, freight, lorry >32 metric ton, EURO3   Cut-off, U | 15187781 | tkm | data      | and |
|                                                                                                                                |          |     | Ecoinvent |     |
|                                                                                                                                |          |     | 3.9.1     |     |

#### 4. Operation & Maintenance

|                                                                                                            |           |     |           |     |
|------------------------------------------------------------------------------------------------------------|-----------|-----|-----------|-----|
| Petrol, unleaded, burned in machinery {GLO}  market for petrol, unleaded, burned in machinery   Cut-off, U | 13340000  | MJ  | Primary   |     |
| Tap water {GLO}  market group for tap water   Cut-off, U                                                   | 186875000 | kg  | data      | and |
| Electricity, low voltage {CN}  market for   Cut-off, U                                                     | 3462500   | kWh | Ecoinvent |     |
|                                                                                                            |           |     | 3.9.1     |     |

#### 5. End of Life

|                                                                              |     |   |           |  |
|------------------------------------------------------------------------------|-----|---|-----------|--|
| Municipal solid waste (waste scenario) {CN}  Treatment of waste   Cut-off, U | 100 | % | Ecoinvent |  |
|                                                                              |     |   | 3.9.1     |  |

##### 5.1 Decommissioning & Dismantling

|                                                                                                            |         |     |           |     |
|------------------------------------------------------------------------------------------------------------|---------|-----|-----------|-----|
| Diesel, burned in building machine {GLO}  diesel, burned in building machine   Cut-off, U                  | 5964000 | MJ  | Primary   |     |
| Petrol, unleaded, burned in machinery {GLO}  market for petrol, unleaded, burned in machinery   Cut-off, U | 920000  | MJ  | data      | and |
| Electricity, low voltage {CN}  market for   Cut-off, U                                                     | 277000  | kWh | Ecoinvent |     |
|                                                                                                            |         |     | 3.9.1     |     |

---

**Table S5 Life cycle inventory data for P50MW2013C. P50MW2013C=the grid-connected 50MW of C PV system in 2013.**

| P50MW2013C                    |                                                                                                    |         |                |           |
|-------------------------------|----------------------------------------------------------------------------------------------------|---------|----------------|-----------|
| Assembly                      | Materials/Processes                                                                                | Amount  | Unit           | Source    |
| <b>1. PV Module</b>           |                                                                                                    |         |                |           |
|                               | Photovoltaic cell, multi-Si wafer {GLO}  market for photovoltaic cell, multi-Si wafer   Cut-off, U | 175669  | m <sup>2</sup> | Primary   |
|                               | Silver {GLO}  market for silver   Cut-off, U                                                       | 6049    | kg             | data and  |
|                               | Aluminium alloy, AlMg3 {GLO}  market for aluminium alloy, AlMg3   Cut-off, U                       | 356079  | kg             | Ecoinvent |
|                               | Solar glass, low-iron {GLO}  market for solar glass, low-iron   Cut-off, U                         | 2973236 | kg             | 3.9.1     |
|                               | Polyvinylfluoride {GLO}  market for polyvinylfluoride   Cut-off, U                                 | 151626  | kg             |           |
|                               | Ethylvinylacetate, foil {GLO}  market for ethylvinylacetate, foil   Cut-off, U                     | 284702  | kg             |           |
|                               | Silicone product {GLO}  market for   Cut-off, U                                                    | 3629    | kg             |           |
|                               | Polyphenylene sulfide {GLO}  market for polyphenylene sulfide   Cut-off, U                         | 103732  | kg             |           |
|                               | Copper {GLO}  market for copper   Cut-off, U                                                       | 66107   | kg             |           |
|                               | Tin {GLO}  market for tin   Cut-off, U                                                             | 6049    | kg             |           |
|                               | Electricity, low voltage {CN}  market for   Cut-off, U                                             | 2016535 | kWh            |           |
| <b>2. Balance of System</b>   |                                                                                                    |         |                |           |
| <b>2.1 Mounting Structure</b> |                                                                                                    |         |                |           |
|                               | Steel, low-alloyed {GLO}  market for steel, low-alloyed   Cut-off, U                               | 3388210 | kg             | Primary   |
|                               | Forging, steel {GLO}  market for forging, steel   Cut-off, U                                       | 3388210 | kg             | data and  |
|                               | Zinc coat, pieces {GLO}  market for zinc coat, pieces   Cut-off, U                                 | 47549   | m <sup>2</sup> | Ecoinvent |
|                               |                                                                                                    |         |                | 3.9.1     |

---

## 2.2 Combiner

|                                                                          |       |    |           |
|--------------------------------------------------------------------------|-------|----|-----------|
| Copper {GLO}  market for copper   Cut-off, U                             | 20000 | kg | Primary   |
| Cast iron {GLO}  market for cast iron   Cut-off, U                       | 4000  | kg | data and  |
| Steel, low-alloyed {GLO}  market for steel, low-alloyed   Cut-off, U     | 16000 | kg | Ecoinvent |
| Wire drawing, copper {GLO}  market for wire drawing, copper   Cut-off, U | 20000 | kg | 3.9.1     |
| Sheet rolling, steel {GLO}  market for sheet rolling, steel   Cut-off, U | 16000 | kg |           |

## 2.3 Inverter

|                                                                          |        |    |           |
|--------------------------------------------------------------------------|--------|----|-----------|
| Copper {GLO}  market for copper   Cut-off, U                             | 151280 | kg | Primary   |
| Cast iron {GLO}  market for cast iron   Cut-off, U                       | 219920 | kg | data and  |
| Steel, low-alloyed {GLO}  market for steel, low-alloyed   Cut-off, U     | 385200 | kg | Ecoinvent |
| Wire drawing, copper {GLO}  market for wire drawing, copper   Cut-off, U | 151280 | kg | 3.9.1     |
| Sheet rolling, steel {GLO}  market for sheet rolling, steel   Cut-off, U | 385200 | kg |           |

## 2.4 Transformer

|                                                                                          |        |    |           |
|------------------------------------------------------------------------------------------|--------|----|-----------|
| Cast iron {GLO}  market for cast iron   Cut-off, U                                       | 106400 | kg | Primary   |
| Silicon, metallurgical grade {GLO}  market for silicon, metallurgical grade   Cut-off, U | 5600   | kg | data and  |
| Copper {GLO}  market for copper   Cut-off, U                                             | 84000  | kg | Ecoinvent |
| Steel, low-alloyed {GLO}  market for steel, low-alloyed   Cut-off, U                     | 70000  | kg | 3.9.1     |
| Aluminium, wrought alloy {GLO}  market for aluminium, wrought alloy   Cut-off, U         | 14000  | kg |           |
| Wire drawing, copper {GLO}  market for wire drawing, copper   Cut-off, U                 | 84000  | kg |           |
| Sheet rolling, steel {GLO}  market for sheet rolling, steel   Cut-off, U                 | 70000  | kg |           |
| Sheet rolling, aluminium {GLO}  market for sheet rolling, aluminium   Cut-off, U         | 14000  | kg |           |

---

---

## 2.5 Electric Transmission Line

|                                                                                                        |        |    |           |
|--------------------------------------------------------------------------------------------------------|--------|----|-----------|
| Cable, unspecified {GLO}  market for cable, unspecified   Cut-off, U                                   | 370956 | kg | Primary   |
| Polyvinylchloride, bulk polymerised {GLO}  market for polyvinylchloride, bulk polymerised   Cut-off, U | 2970   | kg | data and  |
| Steel, low-alloyed {GLO}  market for steel, low-alloyed   Cut-off, U                                   | 138188 | kg | Ecoinvent |
| Sheet rolling, steel {GLO}  market for sheet rolling, steel   Cut-off, U                               | 138188 | kg | 3.9.1     |

## 2.6 Boost Voltage Substation System

|                                                                                          |        |    |           |
|------------------------------------------------------------------------------------------|--------|----|-----------|
| Steel, low-alloyed {GLO}  market for steel, low-alloyed   Cut-off, U                     | 27285  | kg | Primary   |
| Cast iron {GLO}  market for cast iron   Cut-off, U                                       | 12414  | kg | data and  |
| Copper {GLO}  market for copper   Cut-off, U                                             | 12090  | kg | Ecoinvent |
| Aluminium, wrought alloy {GLO}  market for aluminium, wrought alloy   Cut-off, U         | 2565   | kg | 3.9.1     |
| Silicon, metallurgical grade {GLO}  market for silicon, metallurgical grade   Cut-off, U | 1026   | kg |           |
| Silver {GLO}  market for silver   Cut-off, U                                             | 252    | kg |           |
| Polypropylene, granulate {GLO}  market for polypropylene, granulate   Cut-off, U         | 1680   | kg |           |
| Polycarbonate {GLO}  market for polycarbonate   Cut-off, U                               | 588    | kg |           |
| Cable, unspecified {GLO}  market for cable, unspecified   Cut-off, U                     | 129336 | kg |           |
| Sheet rolling, steel {GLO}  market for sheet rolling, steel   Cut-off, U                 | 27285  | kg |           |
| Wire drawing, copper {GLO}  market for wire drawing, copper   Cut-off, U                 | 12090  | kg |           |
| Sheet rolling, aluminium {GLO}  market for sheet rolling, aluminium   Cut-off, U         | 2565   | kg |           |

## 2.7 Control and Protection System

|                                                                      |       |    |          |
|----------------------------------------------------------------------|-------|----|----------|
| Steel, low-alloyed {GLO}  market for steel, low-alloyed   Cut-off, U | 18657 | kg | Primary  |
| Copper {GLO}  market for copper   Cut-off, U                         | 10912 | kg | data and |

---

|                                                                                          |       |    |           |
|------------------------------------------------------------------------------------------|-------|----|-----------|
| Aluminium, wrought alloy {GLO}  market for aluminium, wrought alloy   Cut-off, U         | 6788  | kg | Ecoinvent |
| Cast iron {GLO}  market for cast iron   Cut-off, U                                       | 4527  | kg | 3.9.1     |
| Polycarbonate {GLO}  market for polycarbonate   Cut-off, U                               | 4116  | kg |           |
| Silicon, metallurgical grade {GLO}  market for silicon, metallurgical grade   Cut-off, U | 1600  | kg |           |
| Cable, unspecified {GLO}  market for cable, unspecified   Cut-off, U                     | 22733 | kg |           |
| Sheet rolling, steel {GLO}  market for sheet rolling, steel   Cut-off, U                 | 18657 | kg |           |
| Wire drawing, copper {GLO}  market for wire drawing, copper   Cut-off, U                 | 10912 | kg |           |
| Sheet rolling, aluminium {GLO}  market for sheet rolling, aluminium   Cut-off, U         | 6788  | kg |           |

## 2.8 Firefighting and Ventilation systems

|                                                                                  |       |    |           |
|----------------------------------------------------------------------------------|-------|----|-----------|
| Steel, low-alloyed {GLO}  market for steel, low-alloyed   Cut-off, U             | 15795 | kg | Primary   |
| Copper {GLO}  market for copper   Cut-off, U                                     | 600   | kg | data and  |
| Aluminium, wrought alloy {GLO}  market for aluminium, wrought alloy   Cut-off, U | 300   | kg | Ecoinvent |
| Cable, unspecified {GLO}  market for cable, unspecified   Cut-off, U             | 3699  | kg | 3.9.1     |
| Sheet rolling, steel {GLO}  market for sheet rolling, steel   Cut-off, U         | 15795 | kg |           |
| Wire drawing, copper {GLO}  market for wire drawing, copper   Cut-off, U         | 600   | kg |           |
| Sheet rolling, aluminium {GLO}  market for sheet rolling, aluminium   Cut-off, U | 300   | kg |           |

## 2.9 Civil Works

|                                                                    |         |                |           |
|--------------------------------------------------------------------|---------|----------------|-----------|
| Concrete, 25MPa {GLO}  market for concrete, 25MPa   Cut-off, U     | 9875    | m <sup>3</sup> | Primary   |
| Reinforcing steel {GLO}  market for reinforcing steel   Cut-off, U | 1056445 | kg             | data and  |
| Concrete, 20MPa {GLO}  market for concrete, 20MPa   Cut-off, U     | 864     | m <sup>3</sup> | Ecoinvent |
| Brick {GLO}  market for   Cut-off, U                               | 9963320 | kg             | 3.9.1     |

---

|                                                                                  |          |                |
|----------------------------------------------------------------------------------|----------|----------------|
| Concrete, 30-32MPa {GLO}  market for concrete, 30-32MPa   Cut-off, U             | 909.3    | m <sup>3</sup> |
| Steel, low-alloyed {GLO}  market for steel, low-alloyed   Cut-off, U             | 2570     | kg             |
| Copper {GLO}  market for copper   Cut-off, U                                     | 1800     | kg             |
| Aluminium, wrought alloy {GLO}  market for aluminium, wrought alloy   Cut-off, U | 450      | kg             |
| Gravel, crushed {GLO}  market for   Cut-off, U                                   | 42765660 | kg             |
| Sheet rolling, steel {GLO}  market for sheet rolling, steel   Cut-off, U         | 2570     | kg             |
| Wire drawing, copper {GLO}  market for wire drawing, copper   Cut-off, U         | 1800     | kg             |
| Sheet rolling, aluminium {GLO}  market for sheet rolling, aluminium   Cut-off, U | 450      | kg             |

### 2.9.1 Construction & Installation

|                                                                                                            |          |     |           |
|------------------------------------------------------------------------------------------------------------|----------|-----|-----------|
| Diesel, burned in building machine {GLO}  diesel, burned in building machine   Cut-off, U                  | 5964000  | MJ  | Primary   |
| Tap water {GLO}  market group for tap water   Cut-off, U                                                   | 21600000 | kg  | data and  |
| Petrol, unleaded, burned in machinery {GLO}  market for petrol, unleaded, burned in machinery   Cut-off, U | 920000   | MJ  | Ecoinvent |
| Electricity, low voltage {CN}  market for   Cut-off, U                                                     | 720000   | kWh | 3.9.1     |

### 3. Transportation

|                                                                                                                                |          |     |                                |
|--------------------------------------------------------------------------------------------------------------------------------|----------|-----|--------------------------------|
| Transport, freight, lorry >32 metric ton, EURO3 {RoW}  market for transport, freight, lorry >32 metric ton, EURO3   Cut-off, U | 15031957 | tkm | Primary                        |
| Transport, freight, lorry >32 metric ton, EURO3 {RoW}  market for transport, freight, lorry >32 metric ton, EURO3   Cut-off, U | 14518769 | tkm | data and<br>Ecoinvent<br>3.9.1 |

### 4. Operation & Maintenance

|                                                                                                            |           |    |          |
|------------------------------------------------------------------------------------------------------------|-----------|----|----------|
| Petrol, unleaded, burned in machinery {GLO}  market for petrol, unleaded, burned in machinery   Cut-off, U | 13340000  | MJ | Primary  |
| Tap water {GLO}  market group for tap water   Cut-off, U                                                   | 251157250 | kg | data and |

---

|                                                                                                            |         |     |           |       |
|------------------------------------------------------------------------------------------------------------|---------|-----|-----------|-------|
| Electricity, low voltage {CN}  market for   Cut-off, U                                                     | 1837500 | kWh | Ecoinvent |       |
|                                                                                                            |         |     |           | 3.9.1 |
| <b>5. End of Life</b>                                                                                      |         |     |           |       |
| Municipal solid waste (waste scenario) {CN}  Treatment of waste   Cut-off, U                               | 100     | %   | Ecoinvent |       |
|                                                                                                            |         |     |           | 3.9.1 |
| <b>5.1 Decommissioning &amp; Dismantling</b>                                                               |         |     |           |       |
| Diesel, burned in building machine {GLO}  diesel, burned in building machine   Cut-off, U                  | 5964000 | MJ  | Primary   |       |
| Petrol, unleaded, burned in machinery {GLO}  market for petrol, unleaded, burned in machinery   Cut-off, U | 920000  | MJ  | data and  |       |
| Electricity, low voltage {CN}  market for   Cut-off, U                                                     | 720000  | kWh | Ecoinvent |       |
|                                                                                                            |         |     |           | 3.9.1 |

**Table S6 Life cycle inventory data for P25MW2016. P25MW2016=the grid-connected 25MW of PV system in 2016.**

| P25MW2016                     |                                                                                                    |          |                |           |
|-------------------------------|----------------------------------------------------------------------------------------------------|----------|----------------|-----------|
| Assembly                      | Materials/Processes                                                                                | Amount   | Unit           | Source    |
| <b>1. PV Module</b>           |                                                                                                    |          |                |           |
|                               | Photovoltaic cell, multi-Si wafer {GLO}  market for photovoltaic cell, multi-Si wafer   Cut-off, U | 72810    | m <sup>2</sup> | Primary   |
|                               | Silver {GLO}  market for silver   Cut-off, U                                                       | 2441     | kg             | data and  |
|                               | Aluminium alloy, AlMg3 {GLO}  market for aluminium alloy, AlMg3   Cut-off, U                       | 154482   | kg             | Ecoinvent |
|                               | Solar glass, low-iron {GLO}  market for solar glass, low-iron   Cut-off, U                         | 1291127  | kg             | 3.9.1     |
|                               | Polyvinylfluoride {GLO}  market for polyvinylfluoride   Cut-off, U                                 | 65908    | kg             |           |
|                               | Ethylvinylacetate, foil {GLO}  market for ethylvinylacetate, foil   Cut-off, U                     | 123620   | kg             |           |
|                               | Silicone product {GLO}  market for   Cut-off, U                                                    | 1569     | kg             |           |
|                               | Polyphenylene sulfide {GLO}  market for polyphenylene sulfide   Cut-off, U                         | 42761    | kg             |           |
|                               | Copper {GLO}  market for copper   Cut-off, U                                                       | 27894    | kg             |           |
|                               | Tin {GLO}  market for tin   Cut-off, U                                                             | 2615.382 | kg             |           |
|                               | Electricity, low voltage {CN}  market for   Cut-off, U                                             | 871901   | kWh            |           |
| <b>2. Balance of System</b>   |                                                                                                    |          |                |           |
| <b>2.1 Mounting Structure</b> |                                                                                                    |          |                |           |
|                               | Steel, low-alloyed {GLO}  market for steel, low-alloyed   Cut-off, U                               | 1157680  | kg             | Primary   |
|                               | Forging, steel {GLO}  market for forging, steel   Cut-off, U                                       | 1157680  | kg             | data and  |
|                               | Zinc coat, pieces {GLO}  market for zinc coat, pieces   Cut-off, U                                 | 16247    | m <sup>2</sup> | Ecoinvent |
|                               |                                                                                                    |          |                | 3.9.1     |

---

## 2.2 Combiner

|                                                                          |      |    |           |
|--------------------------------------------------------------------------|------|----|-----------|
| Copper {GLO}  market for copper   Cut-off, U                             | 7452 | kg | Primary   |
| Cast iron {GLO}  market for cast iron   Cut-off, U                       | 1490 | kg | data and  |
| Steel, low-alloyed {GLO}  market for steel, low-alloyed   Cut-off, U     | 5962 | kg | Ecoinvent |
| Wire drawing, copper {GLO}  market for wire drawing, copper   Cut-off, U | 7452 | kg | 3.9.1     |
| Sheet rolling, steel {GLO}  market for sheet rolling, steel   Cut-off, U | 5962 | kg |           |

## 2.3 Inverter

|                                                                          |       |    |           |
|--------------------------------------------------------------------------|-------|----|-----------|
| Copper {GLO}  market for copper   Cut-off, U                             | 20700 | kg | Primary   |
| Cast iron {GLO}  market for cast iron   Cut-off, U                       | 31050 | kg | data and  |
| Steel, low-alloyed {GLO}  market for steel, low-alloyed   Cut-off, U     | 51750 | kg | Ecoinvent |
| Wire drawing, copper {GLO}  market for wire drawing, copper   Cut-off, U | 20700 | kg | 3.9.1     |
| Sheet rolling, steel {GLO}  market for sheet rolling, steel   Cut-off, U | 51750 | kg |           |

## 2.4 Transformer

|                                                                                          |       |    |           |
|------------------------------------------------------------------------------------------|-------|----|-----------|
| Cast iron {GLO}  market for cast iron   Cut-off, U                                       | 48944 | kg | Primary   |
| Silicon, metallurgical grade {GLO}  market for silicon, metallurgical grade   Cut-off, U | 2576  | kg | data and  |
| Copper {GLO}  market for copper   Cut-off, U                                             | 38640 | kg | Ecoinvent |
| Steel, low-alloyed {GLO}  market for steel, low-alloyed   Cut-off, U                     | 32200 | kg | 3.9.1     |
| Aluminium, wrought alloy {GLO}  market for aluminium, wrought alloy   Cut-off, U         | 6440  | kg |           |
| Wire drawing, copper {GLO}  market for wire drawing, copper   Cut-off, U                 | 48944 | kg |           |
| Sheet rolling, steel {GLO}  market for sheet rolling, steel   Cut-off, U                 | 32200 | kg |           |
| Sheet rolling, aluminium {GLO}  market for sheet rolling, aluminium   Cut-off, U         | 6440  | kg |           |

---

---

## 2.5 Electric Transmission Line

|                                                                                                        |        |                |           |
|--------------------------------------------------------------------------------------------------------|--------|----------------|-----------|
| Cable, unspecified {GLO}  market for cable, unspecified   Cut-off, U                                   | 83545  | kg             | Primary   |
| Polyvinylchloride, bulk polymerised {GLO}  market for polyvinylchloride, bulk polymerised   Cut-off, U | 4212   | kg             | data and  |
| Steel, low-alloyed {GLO}  market for steel, low-alloyed   Cut-off, U                                   | 268815 | kg             | Ecoinvent |
| Zinc coat, pieces {GLO}  market for zinc coat, pieces   Cut-off, U                                     | 3698   | m <sup>2</sup> | 3.9.1     |
| Sheet rolling, steel {GLO}  market for sheet rolling, steel   Cut-off, U                               | 268815 | kg             |           |

## 2.6 Boost Voltage Substation System

|                                                                                          |       |    |           |
|------------------------------------------------------------------------------------------|-------|----|-----------|
| Steel, low-alloyed {GLO}  market for steel, low-alloyed   Cut-off, U                     | 9570  | kg | Primary   |
| Cast iron {GLO}  market for cast iron   Cut-off, U                                       | 3898  | kg | data and  |
| Copper {GLO}  market for copper   Cut-off, U                                             | 3945  | kg | Ecoinvent |
| Aluminium, wrought alloy {GLO}  market for aluminium, wrought alloy   Cut-off, U         | 955   | kg | 3.9.1     |
| Silicon, metallurgical grade {GLO}  market for silicon, metallurgical grade   Cut-off, U | 382   | kg |           |
| Silver {GLO}  market for silver   Cut-off, U                                             | 105   | kg |           |
| Polypropylene, granulate {GLO}  market for polypropylene, granulate   Cut-off, U         | 700   | kg |           |
| Polycarbonate {GLO}  market for polycarbonate   Cut-off, U                               | 245   | kg |           |
| Cable, unspecified {GLO}  market for cable, unspecified   Cut-off, U                     | 28307 | kg |           |
| Sheet rolling, steel {GLO}  market for sheet rolling, steel   Cut-off, U                 | 9570  | kg |           |
| Wire drawing, copper {GLO}  market for wire drawing, copper   Cut-off, U                 | 3945  | kg |           |
| Sheet rolling, aluminium {GLO}  market for sheet rolling, aluminium   Cut-off, U         | 955   | kg |           |

## 2.7 Control and Protection System

|                                                                                                    |   |   |         |
|----------------------------------------------------------------------------------------------------|---|---|---------|
| Computer, desktop, without screen {GLO}  market for computer, desktop, without screen   Cut-off, U | 4 | p | Primary |
|----------------------------------------------------------------------------------------------------|---|---|---------|

---

|                                                                                                      |        |    |           |
|------------------------------------------------------------------------------------------------------|--------|----|-----------|
| Display, liquid crystal, 17 inches {GLO}  market for display, liquid crystal, 17 inches   Cut-off, U | 4      | p  | data and  |
| Printer, laser, colour {GLO}  market for printer, laser, colour   Cut-off, U                         | 2      | p  | Ecoinvent |
| Steel, low-alloyed {GLO}  market for steel, low-alloyed   Cut-off, U                                 | 7428   | kg | 3.9.1     |
| Copper {GLO}  market for copper   Cut-off, U                                                         | 4258   | kg |           |
| Aluminium, wrought alloy {GLO}  market for aluminium, wrought alloy   Cut-off, U                     | 2601   | kg |           |
| Cast iron {GLO}  market for cast iron   Cut-off, U                                                   | 1668   | kg |           |
| Polycarbonate {GLO}  market for polycarbonate   Cut-off, U                                           | 1559.6 | kg |           |
| Silicon, metallurgical grade {GLO}  market for silicon, metallurgical grade   Cut-off, U             | 585.6  | kg |           |
| Cable, unspecified {GLO}  market for cable, unspecified   Cut-off, U                                 | 7053   | kg |           |
| Sheet rolling, steel {GLO}  market for sheet rolling, steel   Cut-off, U                             | 7428   | kg |           |
| Wire drawing, copper {GLO}  market for wire drawing, copper   Cut-off, U                             | 4258   | kg |           |
| Sheet rolling, aluminium {GLO}  market for sheet rolling, aluminium   Cut-off, U                     | 2601   | kg |           |

## 2.8 Firefighting and Ventilation systems

|                                                                                      |       |    |           |
|--------------------------------------------------------------------------------------|-------|----|-----------|
| Steel, low-alloyed {GLO}  market for steel, low-alloyed   Cut-off, U                 | 32850 | kg | Primary   |
| Copper {GLO}  market for copper   Cut-off, U                                         | 300   | kg | data and  |
| Aluminium, wrought alloy {GLO}  market for aluminium, wrought alloy   Cut-off, U     | 150   | kg | Ecoinvent |
| Steel, chromium steel 18/8 {GLO}  market for steel, chromium steel 18/8   Cut-off, U | 1200  | kg | 3.9.1     |
| Cast iron {GLO}  market for cast iron   Cut-off, U                                   | 400   | kg |           |
| Cable, unspecified {GLO}  market for cable, unspecified   Cut-off, U                 | 120   | kg |           |
| Sheet rolling, steel {GLO}  market for sheet rolling, steel   Cut-off, U             | 32850 | kg |           |
| Wire drawing, copper {GLO}  market for wire drawing, copper   Cut-off, U             | 300   | kg |           |

---

|                                                                                            |      |    |  |
|--------------------------------------------------------------------------------------------|------|----|--|
| Sheet rolling, aluminium {GLO}  market for sheet rolling, aluminium   Cut-off, U           | 150  | kg |  |
| Sheet rolling, chromium steel {GLO}  market for sheet rolling, chromium steel   Cut-off, U | 1200 | kg |  |

## 2.9 Civil Works

|                                                                                  |         |                |           |
|----------------------------------------------------------------------------------|---------|----------------|-----------|
| Concrete, 30-32MPa {GLO}  market for concrete, 30-32MPa   Cut-off, U             | 3347    | m <sup>3</sup> | Primary   |
| Reinforcing steel {GLO}  market for reinforcing steel   Cut-off, U               | 332150  | kg             | data and  |
| Concrete, 20MPa {GLO}  market for concrete, 20MPa   Cut-off, U                   | 1466    | m <sup>3</sup> | Ecoinvent |
| Brick {GLO}  market for   Cut-off, U                                             | 2810400 | kg             | 3.9.1     |
| Steel, low-alloyed {GLO}  market for steel, low-alloyed   Cut-off, U             | 9910    | kg             |           |
| Copper {GLO}  market for copper   Cut-off, U                                     | 600     | kg             |           |
| Aluminium, wrought alloy {GLO}  market for aluminium, wrought alloy   Cut-off, U | 150     | kg             |           |
| Steel, unalloyed {GLO}  market for steel, unalloyed   Cut-off, U                 | 28200   | kg             |           |
| Gravel, round {GLO}  market for   Cut-off, U                                     | 378000  | kg             |           |
| Gravel, crushed {GLO}  market for   Cut-off, U                                   | 4620000 | kg             |           |
| Concrete, 25MPa {GLO}  market for concrete, 25MPa   Cut-off, U                   | 41      | m <sup>3</sup> |           |
| Sheet rolling, steel {GLO}  market for sheet rolling, steel   Cut-off, U         | 38110   | kg             |           |
| Wire drawing, copper {GLO}  market for wire drawing, copper   Cut-off, U         | 600     | kg             |           |
| Sheet rolling, aluminium {GLO}  market for sheet rolling, aluminium   Cut-off, U | 150     | kg             |           |

### 2.9.1 Construction & Installation

|                                                                                                            |          |    |           |
|------------------------------------------------------------------------------------------------------------|----------|----|-----------|
| Diesel, burned in building machine {GLO}  diesel, burned in building machine   Cut-off, U                  | 2982000  | MJ | Primary   |
| Tap water {GLO}  market group for tap water   Cut-off, U                                                   | 10800000 | kg | data and  |
| Petrol, unleaded, burned in machinery {GLO}  market for petrol, unleaded, burned in machinery   Cut-off, U | 460000   | MJ | Ecoinvent |

---

|                                                                                                                                |          |     |                                |
|--------------------------------------------------------------------------------------------------------------------------------|----------|-----|--------------------------------|
| Electricity, low voltage {CN}  market for   Cut-off, U                                                                         | 90000    | kWh | 3.9.1                          |
| <b>3. Transportation</b>                                                                                                       |          |     |                                |
| Transport, freight, lorry >32 metric ton, EURO3 {RoW}  market for transport, freight, lorry >32 metric ton, EURO3   Cut-off, U | 6043370  | tkm | Primary                        |
| Transport, freight, lorry >32 metric ton, EURO3 {RoW}  market for transport, freight, lorry >32 metric ton, EURO3   Cut-off, U | 5983394  | tkm | data and<br>Ecoinvent<br>3.9.1 |
| <b>4. Operation &amp; Maintenance</b>                                                                                          |          |     |                                |
| Petrol, unleaded, burned in machinery {GLO}  market for petrol, unleaded, burned in machinery   Cut-off, U                     | 6670000  | MJ  | Primary                        |
| Tap water {GLO}  market group for tap water   Cut-off, U                                                                       | 85553500 | kg  | data and                       |
| Electricity, low voltage {CN}  market for   Cut-off, U                                                                         | 3000000  | kWh | Ecoinvent<br>3.9.1             |
| <b>5. End of Life</b>                                                                                                          |          |     |                                |
| Municipal solid waste (waste scenario) {CN}  Treatment of waste   Cut-off, U                                                   | 100      | %   | Ecoinvent<br>3.9.1             |
| <b>5.1 Decommissioning &amp; Dismantling</b>                                                                                   |          |     |                                |
| Diesel, burned in building machine {GLO}  diesel, burned in building machine   Cut-off, U                                      | 2982000  | MJ  | Primary                        |
| Petrol, unleaded, burned in machinery {GLO}  market for petrol, unleaded, burned in machinery   Cut-off, U                     | 460000   | MJ  | data and                       |
| Electricity, low voltage {CN}  market for   Cut-off, U                                                                         | 90000    | kWh | Ecoinvent<br>3.9.1             |

**Table S7 Life cycle inventory data for P50MW2021. P50MW2021=the grid-connected 50MW of PV system in 2021.**

| P50MW2021                     |                                                                                                      |         |                |           |
|-------------------------------|------------------------------------------------------------------------------------------------------|---------|----------------|-----------|
| Assembly                      | Materials/Processes                                                                                  | Amount  | Unit           | Source    |
| <b>1. PV Module</b>           |                                                                                                      |         |                |           |
|                               | Photovoltaic cell, single-Si wafer {GLO}  market for photovoltaic cell, single-Si wafer   Cut-off, U | 162673  | m <sup>2</sup> | Primary   |
|                               | Silver {GLO}  market for silver   Cut-off, U                                                         | 7933    | kg             | data and  |
|                               | Aluminium alloy, AlMg3 {GLO}  market for aluminium alloy, AlMg3   Cut-off, U                         | 247501  | kg             | Ecoinvent |
|                               | Solar glass, low-iron {GLO}  market for solar glass, low-iron   Cut-off, U                           | 1991378 | kg             | 3.9.1     |
|                               | Polyvinylfluoride {GLO}  market for polyvinylfluoride   Cut-off, U                                   | 101539  | kg             |           |
|                               | Ethylvinylacetate, foil {GLO}  market for ethylvinylacetate, foil   Cut-off, U                       | 188799  | kg             |           |
|                               | Silicone product {GLO}  market for   Cut-off, U                                                      | 2380    | kg             |           |
|                               | Polyphenylene sulfide {GLO}  market for polyphenylene sulfide   Cut-off, U                           | 12164   | kg             |           |
|                               | Copper {GLO}  market for copper   Cut-off, U                                                         | 22212   | kg             |           |
|                               | Tin {GLO}  market for tin   Cut-off, U                                                               | 3966    | kg             |           |
|                               | Electricity, low voltage {CN}  market for   Cut-off, U                                               | 1322121 | kWh            |           |
| <b>2. Balance of System</b>   |                                                                                                      |         |                |           |
| <b>2.1 Mounting Structure</b> |                                                                                                      |         |                |           |
|                               | Steel, low-alloyed {GLO}  market for steel, low-alloyed   Cut-off, U                                 | 576495  | kg             | Primary   |
|                               | Aluminium alloy, AlMg3 {GLO}  market for aluminium alloy, AlMg3   Cut-off, U                         | 134300  | kg             | data and  |
|                               | Forging, steel {GLO}  market for forging, steel   Cut-off, U                                         | 576495  | kg             | Ecoinvent |
|                               | Zinc coat, pieces {GLO}  market for zinc coat, pieces   Cut-off, U                                   | 8090    | m <sup>2</sup> | 3.9.1     |

---

## 2.2 Combiner

|                                                                          |      |    |           |
|--------------------------------------------------------------------------|------|----|-----------|
| Copper {GLO}  market for copper   Cut-off, U                             | 4914 | kg | Primary   |
| Cast iron {GLO}  market for cast iron   Cut-off, U                       | 983  | kg | data and  |
| Steel, low-alloyed {GLO}  market for steel, low-alloyed   Cut-off, U     | 3931 | kg | Ecoinvent |
| Wire drawing, copper {GLO}  market for wire drawing, copper   Cut-off, U | 4914 | kg | 3.9.1     |
| Sheet rolling, steel {GLO}  market for sheet rolling, steel   Cut-off, U | 3931 | kg |           |

## 2.3 Integrated Inverter and Transformer

|                                                                                          |       |    |           |
|------------------------------------------------------------------------------------------|-------|----|-----------|
| Cast iron {GLO}  market for cast iron   Cut-off, U                                       | 69825 | kg | Primary   |
| Silicon, metallurgical grade {GLO}  market for silicon, metallurgical grade   Cut-off, U | 3675  | kg | data and  |
| Copper {GLO}  market for copper   Cut-off, U                                             | 52500 | kg | Ecoinvent |
| Steel, low-alloyed {GLO}  market for steel, low-alloyed   Cut-off, U                     | 73500 | kg | 3.9.1     |
| Aluminium, wrought alloy {GLO}  market for aluminium, wrought alloy   Cut-off, U         | 10500 | kg |           |
| Wire drawing, copper {GLO}  market for wire drawing, copper   Cut-off, U                 | 52500 | kg |           |
| Sheet rolling, steel {GLO}  market for sheet rolling, steel   Cut-off, U                 | 73500 | kg |           |
| Sheet rolling, aluminium {GLO}  market for sheet rolling, aluminium   Cut-off, U         | 10500 | kg |           |

## 2.4 Electric Transmission Line

|                                                                                                            |       |                |           |
|------------------------------------------------------------------------------------------------------------|-------|----------------|-----------|
| Cable, unspecified {GLO}  market for cable, unspecified   Cut-off, U                                       | 94089 | kg             | Primary   |
| Steel, low-alloyed {GLO}  market for steel, low-alloyed   Cut-off, U                                       | 11192 | kg             | data and  |
| Polyethylene, high density, granulate {GLO}  market for polyethylene, high density, granulate   Cut-off, U | 36260 | kg             | Ecoinvent |
| Zinc coat, pieces {GLO}  market for zinc coat, pieces   Cut-off, U                                         | 157   | m <sup>2</sup> | 3.9.1     |
| Sheet rolling, steel {GLO}  market for sheet rolling, steel   Cut-off, U                                   | 11192 | kg             |           |

---

---

## 2.5 Boost Voltage Substation System

|                                                                                          |       |    |           |
|------------------------------------------------------------------------------------------|-------|----|-----------|
| Steel, low-alloyed {GLO}  market for steel, low-alloyed   Cut-off, U                     | 27089 | kg | Primary   |
| Cast iron {GLO}  market for cast iron   Cut-off, U                                       | 7930  | kg | data and  |
| Copper {GLO}  market for copper   Cut-off, U                                             | 8031  | kg | Ecoinvent |
| Aluminium, wrought alloy {GLO}  market for aluminium, wrought alloy   Cut-off, U         | 612   | kg | 3.9.1     |
| Silicon, metallurgical grade {GLO}  market for silicon, metallurgical grade   Cut-off, U | 245   | kg |           |
| Silver {GLO}  market for silver   Cut-off, U                                             | 72    | kg |           |
| Polypropylene, granulate {GLO}  market for polypropylene, granulate   Cut-off, U         | 480   | kg |           |
| Polycarbonate {GLO}  market for polycarbonate   Cut-off, U                               | 168   | kg |           |
| Cable, unspecified {GLO}  market for cable, unspecified   Cut-off, U                     | 17346 | kg |           |
| Sheet rolling, steel {GLO}  market for sheet rolling, steel   Cut-off, U                 | 27089 | kg |           |
| Wire drawing, copper {GLO}  market for wire drawing, copper   Cut-off, U                 | 8031  | kg |           |
| Sheet rolling, aluminium {GLO}  market for sheet rolling, aluminium   Cut-off, U         | 612   | kg |           |

## 2.6 Control and Protection System

|                                                                                                      |       |    |           |
|------------------------------------------------------------------------------------------------------|-------|----|-----------|
| Computer, desktop, without screen {GLO}  market for computer, desktop, without screen   Cut-off, U   | 4     | p  | Primary   |
| Display, liquid crystal, 17 inches {GLO}  market for display, liquid crystal, 17 inches   Cut-off, U | 4     | p  | data and  |
| Printer, laser, colour {GLO}  market for printer, laser, colour   Cut-off, U                         | 1     | p  | Ecoinvent |
| Steel, low-alloyed {GLO}  market for steel, low-alloyed   Cut-off, U                                 | 52049 | kg | 3.9.1     |
| Copper {GLO}  market for copper   Cut-off, U                                                         | 2274  | kg |           |
| Aluminium, wrought alloy {GLO}  market for aluminium, wrought alloy   Cut-off, U                     | 1418  | kg |           |
| Cast iron {GLO}  market for cast iron   Cut-off, U                                                   | 1179  | kg |           |

---

|                                                                                                                          |       |                |
|--------------------------------------------------------------------------------------------------------------------------|-------|----------------|
| Polycarbonate {GLO}  market for polycarbonate   Cut-off, U                                                               | 776   | kg             |
| Silicon, metallurgical grade {GLO}  market for silicon, metallurgical grade   Cut-off, U                                 | 284   | kg             |
| Battery, lead acid, rechargeable, stationary {GLO}  market for battery, lead acid, rechargeable, stationary   Cut-off, U | 1480  | kg             |
| Cable, unspecified {GLO}  market for cable, unspecified   Cut-off, U                                                     | 5833  | kg             |
| Sheet rolling, steel {GLO}  market for sheet rolling, steel   Cut-off, U                                                 | 52049 | kg             |
| Wire drawing, copper {GLO}  market for wire drawing, copper   Cut-off, U                                                 | 2274  | kg             |
| Sheet rolling, aluminium {GLO}  market for sheet rolling, aluminium   Cut-off, U                                         | 1418  | kg             |
| Zinc coat, pieces {GLO}  market for zinc coat, pieces   Cut-off, U                                                       | 46    | m <sup>2</sup> |

## 2.7 Firefighting and Ventilation systems

|                                                                                          |       |    |           |
|------------------------------------------------------------------------------------------|-------|----|-----------|
| Steel, low-alloyed {GLO}  market for steel, low-alloyed   Cut-off, U                     | 17210 | kg | Primary   |
| Copper {GLO}  market for copper   Cut-off, U                                             | 5849  | kg | data and  |
| Aluminium, wrought alloy {GLO}  market for aluminium, wrought alloy   Cut-off, U         | 149.4 | kg | Ecoinvent |
| Cast iron {GLO}  market for cast iron   Cut-off, U                                       | 5737  | kg | 3.9.1     |
| Polycarbonate {GLO}  market for polycarbonate   Cut-off, U                               | 60    | kg |           |
| Silicon, metallurgical grade {GLO}  market for silicon, metallurgical grade   Cut-off, U | 15    | kg |           |
| Cable, unspecified {GLO}  market for cable, unspecified   Cut-off, U                     | 800   | kg |           |
| Sheet rolling, steel {GLO}  market for sheet rolling, steel   Cut-off, U                 | 17210 | kg |           |
| Wire drawing, copper {GLO}  market for wire drawing, copper   Cut-off, U                 | 5849  | kg |           |
| Sheet rolling, aluminium {GLO}  market for sheet rolling, aluminium   Cut-off, U         | 149   | kg |           |

## 2.8 Civil Works

|                                                                      |      |                |         |
|----------------------------------------------------------------------|------|----------------|---------|
| Concrete, 30-32MPa {GLO}  market for concrete, 30-32MPa   Cut-off, U | 1431 | m <sup>3</sup> | Primary |
|----------------------------------------------------------------------|------|----------------|---------|

|                                                                          |          |                |           |
|--------------------------------------------------------------------------|----------|----------------|-----------|
| Reinforcing steel {GLO}  market for reinforcing steel   Cut-off, U       | 152060   | kg             | data and  |
| Concrete, 20MPa {GLO}  market for concrete, 20MPa   Cut-off, U           | 62.5     | m <sup>3</sup> | Ecoinvent |
| Brick {GLO}  market for   Cut-off, U                                     | 298000   | kg             | 3.9.1     |
| Gravel, round {GLO}  market for   Cut-off, U                             | 1340640  | kg             |           |
| Steel, unalloyed {GLO}  market for steel, unalloyed   Cut-off, U         | 52236    | kg             |           |
| Steel, low-alloyed {GLO}  market for steel, low-alloyed   Cut-off, U     | 640      | kg             |           |
| Concrete, 25MPa {GLO}  market for concrete, 25MPa   Cut-off, U           | 260      | m <sup>3</sup> |           |
| Gravel, crushed {GLO}  market for   Cut-off, U                           | 10208728 | kg             |           |
| Sheet rolling, steel {GLO}  market for sheet rolling, steel   Cut-off, U | 52876    | kg             |           |

### 2.8.1 Construction & Installation

|                                                                                                            |          |     |           |
|------------------------------------------------------------------------------------------------------------|----------|-----|-----------|
| Diesel, burned in building machine {GLO}  diesel, burned in building machine   Cut-off, U                  | 3834000  | MJ  | Primary   |
| Tap water {GLO}  market group for tap water   Cut-off, U                                                   | 21600000 | kg  | data and  |
| Petrol, unleaded, burned in machinery {GLO}  market for petrol, unleaded, burned in machinery   Cut-off, U | 690000   | MJ  | Ecoinvent |
| Electricity, low voltage {CN}  market for   Cut-off, U                                                     | 180000   | kWh | 3.9.1     |

### 3. Transportation

|                                                                                                                                |         |     |                                |
|--------------------------------------------------------------------------------------------------------------------------------|---------|-----|--------------------------------|
| Transport, freight, lorry >32 metric ton, EURO3 {RoW}  market for transport, freight, lorry >32 metric ton, EURO3   Cut-off, U | 7727005 | tkm | Primary                        |
| Transport, freight, lorry >32 metric ton, EURO3 {RoW}  market for transport, freight, lorry >32 metric ton, EURO3   Cut-off, U | 7265030 | tkm | data and<br>Ecoinvent<br>3.9.1 |

### 4. Operation & Maintenance

|                                                                                                            |         |    |         |
|------------------------------------------------------------------------------------------------------------|---------|----|---------|
| Petrol, unleaded, burned in machinery {GLO}  market for petrol, unleaded, burned in machinery   Cut-off, U | 5290000 | MJ | Primary |
|------------------------------------------------------------------------------------------------------------|---------|----|---------|

|                                                                                                            |          |     |           |       |
|------------------------------------------------------------------------------------------------------------|----------|-----|-----------|-------|
| Tap water {GLO}  market group for tap water   Cut-off, U                                                   | 40000000 | kg  | data      | and   |
| Electricity, low voltage {CN}  market for   Cut-off, U                                                     | 1475000  | kWh | Ecoinvent |       |
|                                                                                                            |          |     |           | 3.9.1 |
| <b>5. End of Life</b>                                                                                      |          |     |           |       |
| Municipal solid waste (waste scenario) {CN}  Treatment of waste   Cut-off, U                               | 100      | %   | Ecoinvent |       |
|                                                                                                            |          |     |           | 3.9.1 |
| <b>5.1 Decommissioning &amp; Dismantling</b>                                                               |          |     |           |       |
| Diesel, burned in building machine {GLO}  diesel, burned in building machine   Cut-off, U                  | 3834000  | MJ  | Primary   |       |
| Petrol, unleaded, burned in machinery {GLO}  market for petrol, unleaded, burned in machinery   Cut-off, U | 690000   | MJ  | data      | and   |
| Electricity, low voltage {CN}  market for   Cut-off, U                                                     | 180000   | kWh | Ecoinvent |       |
|                                                                                                            |          |     |           | 3.9.1 |

**Table S8 Life cycle inventory data for P500MW2023. P500MW2023+ESS=the grid-connected 500MW of PV system in 2023 considering ESS.**

| P500MW2023                    |                                                                                                      |          |                |           |
|-------------------------------|------------------------------------------------------------------------------------------------------|----------|----------------|-----------|
| Assembly                      | Materials/Processes                                                                                  | Amount   | Unit           | Source    |
| <b>1. PV Module</b>           |                                                                                                      |          |                |           |
|                               | Photovoltaic cell, single-Si wafer {GLO}  market for photovoltaic cell, single-Si wafer   Cut-off, U | 2215463  | m <sup>2</sup> | Primary   |
|                               | Silver {GLO}  market for silver   Cut-off, U                                                         | 97001    | kg             | data and  |
|                               | Solar glass, low-iron {GLO}  market for solar glass, low-iron   Cut-off, U                           | 28381876 | kg             | Ecoinvent |
|                               | Ethylvinylacetate, foil {GLO}  market for ethylvinylacetate, foil   Cut-off, U                       | 2270550  | kg             | 3.9.1     |
|                               | Aluminium alloy, AlMg3 {GLO}  market for aluminium alloy, AlMg3   Cut-off, U                         | 2866929  | kg             |           |
|                               | Silicone product {GLO}  market for   Cut-off, U                                                      | 28741    | kg             |           |
|                               | Polyphenylene sulfide {GLO}  market for polyphenylene sulfide   Cut-off, U                           | 883790   | kg             |           |
|                               | Copper {GLO}  market for copper   Cut-off, U                                                         | 549674   | kg             |           |
|                               | Tin {GLO}  market for tin   Cut-off, U                                                               | 50297    | kg             |           |
|                               | Electricity, low voltage {CN}  market for   Cut-off, U                                               | 17963213 | kg             |           |
| <b>2. Balance of System</b>   |                                                                                                      |          |                |           |
| <b>2.1 Mounting Structure</b> |                                                                                                      |          |                |           |
|                               | Steel, low-alloyed {GLO}  market for steel, low-alloyed   Cut-off, U                                 | 20860678 | kg             | Primary   |
|                               | Aluminium alloy, AlMg3 {GLO}  market for aluminium alloy, AlMg3   Cut-off, U                         | 898016   | kg             | data and  |
|                               | Steel, chromium steel 18/8 {GLO}  market for steel, chromium steel 18/8   Cut-off, U                 | 449008   | kg             | Ecoinvent |
|                               | Polyphenylene sulfide {GLO}  market for polyphenylene sulfide   Cut-off, U                           | 44900.8  | kg             | 3.9.1     |
|                               | Copper {GLO}  market for copper   Cut-off, U                                                         | 67351    | kg             |           |

---

|                                                                                            |          |                |  |
|--------------------------------------------------------------------------------------------|----------|----------------|--|
| Forging, steel {GLO}  market for forging, steel   Cut-off, U                               | 20860678 | kg             |  |
| Zinc coat, pieces {GLO}  market for zinc coat, pieces   Cut-off, U                         | 281348   | m <sup>2</sup> |  |
| Sheet rolling, chromium steel {GLO}  market for sheet rolling, chromium steel   Cut-off, U | 449008   | kg             |  |
| Wire drawing, copper {GLO}  market for wire drawing, copper   Cut-off, U                   | 67351    | kg             |  |

## 2.2 Combiner

|                                                                          |       |    |           |
|--------------------------------------------------------------------------|-------|----|-----------|
| Copper {GLO}  market for copper   Cut-off, U                             | 30800 | kg | Primary   |
| Cast iron {GLO}  market for cast iron   Cut-off, U                       | 6160  | kg | data and  |
| Steel, low-alloyed {GLO}  market for steel, low-alloyed   Cut-off, U     | 24640 | kg | Ecoinvent |
| Wire drawing, copper {GLO}  market for wire drawing, copper   Cut-off, U | 30800 | kg | 3.9.1     |
| Sheet rolling, steel {GLO}  market for sheet rolling, steel   Cut-off, U | 24640 | kg |           |

## 2.3 Inverter

|                                                                          |        |    |           |
|--------------------------------------------------------------------------|--------|----|-----------|
| Copper {GLO}  market for copper   Cut-off, U                             | 66528  | kg | Primary   |
| Cast iron {GLO}  market for cast iron   Cut-off, U                       | 99792  | kg | data and  |
| Steel, low-alloyed {GLO}  market for steel, low-alloyed   Cut-off, U     | 166320 | kg | Ecoinvent |
| Wire drawing, copper {GLO}  market for wire drawing, copper   Cut-off, U | 66528  | kg | 3.9.1     |
| Sheet rolling, steel {GLO}  market for sheet rolling, steel   Cut-off, U | 166320 | kg |           |

## 2.4 Transformer

|                                                                                          |        |    |           |
|------------------------------------------------------------------------------------------|--------|----|-----------|
| Cast iron {GLO}  market for cast iron   Cut-off, U                                       | 444600 | kg | Primary   |
| Silicon, metallurgical grade {GLO}  market for silicon, metallurgical grade   Cut-off, U | 23400  | kg | data and  |
| Copper {GLO}  market for copper   Cut-off, U                                             | 351000 | kg | Ecoinvent |
| Steel, low-alloyed {GLO}  market for steel, low-alloyed   Cut-off, U                     | 292500 | kg | 3.9.1     |

---

|                                                                                  |        |    |
|----------------------------------------------------------------------------------|--------|----|
| Aluminium, wrought alloy {GLO}  market for aluminium, wrought alloy   Cut-off, U | 58500  | kg |
| Wire drawing, copper {GLO}  market for wire drawing, copper   Cut-off, U         | 351000 | kg |
| Sheet rolling, steel {GLO}  market for sheet rolling, steel   Cut-off, U         | 292500 | kg |
| Sheet rolling, aluminium {GLO}  market for sheet rolling, aluminium   Cut-off, U | 58500  | kg |

## 2.5 Integrated Inverter and Transformer

|                                                                                          |        |    |           |
|------------------------------------------------------------------------------------------|--------|----|-----------|
| Cast iron {GLO}  market for cast iron   Cut-off, U                                       | 478800 | kg | Primary   |
| Silicon, metallurgical grade {GLO}  market for silicon, metallurgical grade   Cut-off, U | 25200  | kg | data and  |
| Copper {GLO}  market for copper   Cut-off, U                                             | 360000 | kg | Ecoinvent |
| Steel, low-alloyed {GLO}  market for steel, low-alloyed   Cut-off, U                     | 504000 | kg | 3.9.1     |
| Aluminium, wrought alloy {GLO}  market for aluminium, wrought alloy   Cut-off, U         | 72000  | kg |           |
| Wire drawing, copper {GLO}  market for wire drawing, copper   Cut-off, U                 | 360000 | kg |           |
| Sheet rolling, steel {GLO}  market for sheet rolling, steel   Cut-off, U                 | 504000 | kg |           |
| Sheet rolling, aluminium {GLO}  market for sheet rolling, aluminium   Cut-off, U         | 72000  | kg |           |

## 2.6 Electric Transmission Line

|                                                                          |         |    |           |
|--------------------------------------------------------------------------|---------|----|-----------|
| Cable, unspecified {GLO}  market for cable, unspecified   Cut-off, U     | 1522537 | kg | Primary   |
| Steel, low-alloyed {GLO}  market for steel, low-alloyed   Cut-off, U     | 850110  | kg | data and  |
| Sheet rolling, steel {GLO}  market for sheet rolling, steel   Cut-off, U | 850110  | kg | Ecoinvent |
|                                                                          |         |    | 3.9.1     |

## 2.7 Boost Voltage Substation System

|                                                                      |        |    |          |
|----------------------------------------------------------------------|--------|----|----------|
| Steel, low-alloyed {GLO}  market for steel, low-alloyed   Cut-off, U | 227729 | kg | Primary  |
| Cast iron {GLO}  market for cast iron   Cut-off, U                   | 152457 | kg | data and |

|                                                                                            |        |    |           |
|--------------------------------------------------------------------------------------------|--------|----|-----------|
| Silicon, metallurgical grade {GLO}  market for silicon, metallurgical grade   Cut-off, U   | 8083   | kg | Ecoinvent |
| Copper {GLO}  market for copper   Cut-off, U                                               | 171725 | kg | 3.9.1     |
| Aluminium, wrought alloy {GLO}  market for aluminium, wrought alloy   Cut-off, U           | 28188  | kg |           |
| Steel, chromium steel 18/8 {GLO}  market for steel, chromium steel 18/8   Cut-off, U       | 27840  | kg |           |
| Synthetic rubber {GLO}  market for synthetic rubber   Cut-off, U                           | 6960   | kg |           |
| Zinc oxide {GLO}  market for zinc oxide   Cut-off, U                                       | 6960   | kg |           |
| Cable, unspecified {GLO}  market for cable, unspecified   Cut-off, U                       | 11178  | kg |           |
| Silver {GLO}  market for silver   Cut-off, U                                               | 480    | kg |           |
| Polypropylene, granulate {GLO}  market for polypropylene, granulate   Cut-off, U           | 3200   | kg |           |
| Polycarbonate {GLO}  market for polycarbonate   Cut-off, U                                 | 1120   | kg |           |
| Sheet rolling, steel {GLO}  market for sheet rolling, steel   Cut-off, U                   | 227729 | kg |           |
| Wire drawing, copper {GLO}  market for wire drawing, copper   Cut-off, U                   | 171725 | kg |           |
| Sheet rolling, aluminium {GLO}  market for sheet rolling, aluminium   Cut-off, U           | 28188  | kg |           |
| Sheet rolling, chromium steel {GLO}  market for sheet rolling, chromium steel   Cut-off, U | 27840  | kg |           |

## 2.8 Control and Protection System

|                                                                                                      |        |    |           |
|------------------------------------------------------------------------------------------------------|--------|----|-----------|
| Computer, desktop, without screen {GLO}  market for computer, desktop, without screen   Cut-off, U   | 6      | p  | Primary   |
| Display, liquid crystal, 17 inches {GLO}  market for display, liquid crystal, 17 inches   Cut-off, U | 6      | p  | data and  |
| Printer, laser, colour {GLO}  market for printer, laser, colour   Cut-off, U                         | 2      | p  | Ecoinvent |
| Steel, low-alloyed {GLO}  market for steel, low-alloyed   Cut-off, U                                 | 418842 | kg | 3.9.1     |
| Copper {GLO}  market for copper   Cut-off, U                                                         | 11305  | kg |           |

|                                                                                                                          |        |                |
|--------------------------------------------------------------------------------------------------------------------------|--------|----------------|
| Aluminium, wrought alloy {GLO}  market for aluminium, wrought alloy   Cut-off, U                                         | 6601   | kg             |
| Cast iron {GLO}  market for cast iron   Cut-off, U                                                                       | 3884   | kg             |
| Polycarbonate {GLO}  market for polycarbonate   Cut-off, U                                                               | 2905   | kg             |
| Silicon, metallurgical grade {GLO}  market for silicon, metallurgical grade   Cut-off, U                                 | 1248   | kg             |
| Battery, lead acid, rechargeable, stationary {GLO}  market for battery, lead acid, rechargeable, stationary   Cut-off, U | 7186   | kg             |
| Cable, unspecified {GLO}  market for cable, unspecified   Cut-off, U                                                     | 61720  | kg             |
| Polyphenylene sulfide {GLO}  market for polyphenylene sulfide   Cut-off, U                                               | 847    | kg             |
| Tin {GLO}  market for tin   Cut-off, U                                                                                   | 24     | kg             |
| Sheet rolling, steel {GLO}  market for sheet rolling, steel   Cut-off, U                                                 | 418842 | kg             |
| Wire drawing, copper {GLO}  market for wire drawing, copper   Cut-off, U                                                 | 11305  | kg             |
| Sheet rolling, aluminium {GLO}  market for sheet rolling, aluminium   Cut-off, U                                         | 6601   | kg             |
| Zinc coat, pieces {GLO}  market for zinc coat, pieces   Cut-off, U                                                       | 88     | m <sup>2</sup> |

## 2.9 Firefighting and Ventilation systems

|                                                                                      |       |    |           |
|--------------------------------------------------------------------------------------|-------|----|-----------|
| Steel, low-alloyed {GLO}  market for steel, low-alloyed   Cut-off, U                 | 12990 | kg | Primary   |
| Copper {GLO}  market for copper   Cut-off, U                                         | 1500  | kg | data and  |
| Aluminium, wrought alloy {GLO}  market for aluminium, wrought alloy   Cut-off, U     | 750   | kg | Ecoinvent |
| Steel, chromium steel 18/8 {GLO}  market for steel, chromium steel 18/8   Cut-off, U | 1500  | kg | 3.9.1     |
| Cast iron {GLO}  market for cast iron   Cut-off, U                                   | 160   | kg |           |
| Sheet rolling, steel {GLO}  market for sheet rolling, steel   Cut-off, U             | 12990 | kg |           |
| Wire drawing, copper {GLO}  market for wire drawing, copper   Cut-off, U             | 1500  | kg |           |
| Sheet rolling, aluminium {GLO}  market for sheet rolling, aluminium   Cut-off, U     | 750   | kg |           |

|                                                                                            |           |                |           |
|--------------------------------------------------------------------------------------------|-----------|----------------|-----------|
| Sheet rolling, chromium steel {GLO}  market for sheet rolling, chromium steel   Cut-off, U | 1500      | kg             |           |
| <b>2.10 Civil Works</b>                                                                    |           |                |           |
| Concrete, 30-32MPa {GLO}  market for concrete, 30-32MPa   Cut-off, U                       | 35004     | m <sup>3</sup> | Primary   |
| Reinforcing steel {GLO}  market for reinforcing steel   Cut-off, U                         | 2201733   | kg             | data and  |
| Steel, low-alloyed {GLO}  market for steel, low-alloyed   Cut-off, U                       | 1011950   | kg             | Ecoinvent |
| Concrete, 20MPa {GLO}  market for concrete, 20MPa   Cut-off, U                             | 668       | m <sup>3</sup> | 3.9.1     |
| Brick {GLO}  market for   Cut-off, U                                                       | 8994560   | kg             |           |
| Gravel, round {GLO}  market for   Cut-off, U                                               | 11023950  | kg             |           |
| Steel, unalloyed {GLO}  market for steel, unalloyed   Cut-off, U                           | 159075    | kg             |           |
| Concrete, 40MPa {RoW}  concrete production 40MPa   Cut-off, U                              | 92        | m <sup>3</sup> |           |
| Concrete, 25MPa {GLO}  market for concrete, 25MPa   Cut-off, U                             | 4392      | m <sup>3</sup> |           |
| Concrete block {GLO}  market for concrete block   Cut-off, U                               | 419328    | kg             |           |
| Gravel, crushed {GLO}  market for   Cut-off, U                                             | 102532500 | kg             |           |
| Concrete, 35MPa {GLO}  market for concrete, 35MPa   Cut-off, U                             | 480       | m <sup>3</sup> |           |
| Copper {GLO}  market for copper   Cut-off, U                                               | 4000      | kg             |           |
| Aluminium, wrought alloy {GLO}  market for aluminium, wrought alloy   Cut-off, U           | 1000      | kg             |           |
| Sheet rolling, steel {GLO}  market for sheet rolling, steel   Cut-off, U                   | 1171025   | kg             |           |
| Wire drawing, copper {GLO}  market for wire drawing, copper   Cut-off, U                   | 4000      | kg             |           |
| Sheet rolling, aluminium {GLO}  market for sheet rolling, aluminium   Cut-off, U           | 1000      | kg             |           |
| <b>2.10.1 Construction &amp; Installation</b>                                              |           |                |           |
| Diesel, burned in building machine {GLO}  diesel, burned in building machine   Cut-off, U  | 38340000  | MJ             | Primary   |

---

|                                                                                                            |           |     |           |
|------------------------------------------------------------------------------------------------------------|-----------|-----|-----------|
| Tap water {GLO}  market group for tap water   Cut-off, U                                                   | 216000000 | kg  | data and  |
| Petrol, unleaded, burned in machinery {GLO}  market for petrol, unleaded, burned in machinery   Cut-off, U | 6900000   | MJ  | Ecoinvent |
| Electricity, low voltage {CN}  market for   Cut-off, U                                                     | 1800000   | kWh | 3.9.1     |

### 3. Energy Storage Systems

|                                                                                                                            |         |                |           |
|----------------------------------------------------------------------------------------------------------------------------|---------|----------------|-----------|
| Steel, low-alloyed {GLO}  market for steel, low-alloyed   Cut-off, U                                                       | 1107041 | kg             | Primary   |
| Copper {GLO}  market for copper   Cut-off, U                                                                               | 310625  | kg             | data and  |
| Aluminium, wrought alloy {GLO}  market for aluminium, wrought alloy   Cut-off, U                                           | 163350  | kg             | Ecoinvent |
| Silicon, metallurgical grade {GLO}  market for silicon, metallurgical grade   Cut-off, U                                   | 96455   | kg             | 3.9.1     |
| Polycarbonate {GLO}  market for polycarbonate   Cut-off, U                                                                 | 44820   | kg             |           |
| Battery, Li-ion, LFP, rechargeable, prismatic {GLO}  market for battery, Li-ion, LFP, rechargeable, prismatic   Cut-off, U | 4178304 | kg             |           |
| Battery, lead acid, rechargeable, stationary {GLO}  market for battery, lead acid, rechargeable, stationary   Cut-off, U   | 1500    | kg             |           |
| Computer, desktop, without screen {GLO}  market for computer, desktop, without screen   Cut-off, U                         | 4       | kg             |           |
| Cast iron {GLO}  market for cast iron   Cut-off, U                                                                         | 37.5    | kg             |           |
| Cable, unspecified {GLO}  market for cable, unspecified   Cut-off, U                                                       | 225348  | kg             |           |
| Zinc coat, pieces {GLO}  market for zinc coat, pieces   Cut-off, U                                                         | 570     | m <sup>2</sup> |           |
| Sheet rolling, steel {GLO}  market for sheet rolling, steel   Cut-off, U                                                   | 1107041 | kg             |           |
| Wire drawing, copper {GLO}  market for wire drawing, copper   Cut-off, U                                                   | 310625  | kg             |           |
| Sheet rolling, aluminium {GLO}  market for sheet rolling, aluminium   Cut-off, U                                           | 163350  | kg             |           |

#### 3.1 Civil Works of Energy Storage Systems

|                                                                |         |                |          |
|----------------------------------------------------------------|---------|----------------|----------|
| Gravel, crushed {GLO}  market for   Cut-off, U                 | 3161078 | kg             | Primary  |
| Concrete, 20MPa {GLO}  market for concrete, 20MPa   Cut-off, U | 2429    | m <sup>3</sup> | data and |

---

|                                                                          |         |                |           |
|--------------------------------------------------------------------------|---------|----------------|-----------|
| Concrete, 30-32MPa {GLO}  market for concrete, 30-32MPa   Cut-off, U     | 4785    | m <sup>3</sup> | Ecoinvent |
| Reinforcing steel {GLO}  market for reinforcing steel   Cut-off, U       | 516836  | kg             | 3.9.1     |
| Steel, low-alloyed {GLO}  market for steel, low-alloyed   Cut-off, U     | 37350   | kg             |           |
| Brick {GLO}  market for   Cut-off, U                                     | 1066052 | kg             |           |
| Polyester resin, unsaturated {GLO}  market for   Cut-off, U              | 29702   | kg             |           |
| Glass fibre {GLO}  market for glass fibre   Cut-off, U                   | 4243    | kg             |           |
| Sheet rolling, steel {GLO}  market for sheet rolling, steel   Cut-off, U | 37350   | kg             |           |

#### 4. Transportation

##### 4.1 Transportation of P500MW2023

|                                                                                                                                |           |     |                                |
|--------------------------------------------------------------------------------------------------------------------------------|-----------|-----|--------------------------------|
| Transport, freight, lorry >32 metric ton, EURO3 {RoW}  market for transport, freight, lorry >32 metric ton, EURO3   Cut-off, U | 111941341 | tkm | Primary                        |
| Transport, freight, lorry >32 metric ton, EURO3 {RoW}  market for transport, freight, lorry >32 metric ton, EURO3   Cut-off, U | 109670212 | tkm | data and<br>Ecoinvent<br>3.9.1 |

##### 4.2 Transportation of Energy Storage Systems

|                                                                                                                                |         |     |                                |
|--------------------------------------------------------------------------------------------------------------------------------|---------|-----|--------------------------------|
| Transport, freight, lorry >32 metric ton, EURO3 {RoW}  market for transport, freight, lorry >32 metric ton, EURO3   Cut-off, U | 6570688 | tkm | Primary                        |
| Transport, freight, lorry >32 metric ton, EURO3 {RoW}  market for transport, freight, lorry >32 metric ton, EURO3   Cut-off, U | 6507467 | tkm | data and<br>Ecoinvent<br>3.9.1 |

#### 5. Operation & Maintenance

|                                                                                                            |           |    |          |
|------------------------------------------------------------------------------------------------------------|-----------|----|----------|
| Petrol, unleaded, burned in machinery {GLO}  market for petrol, unleaded, burned in machinery   Cut-off, U | 10005000  | MJ | Primary  |
| Tap water {GLO}  market group for tap water   Cut-off, U                                                   | 300000000 | kg | data and |

|                                                                                                            |          |     |           |       |
|------------------------------------------------------------------------------------------------------------|----------|-----|-----------|-------|
| Electricity, low voltage {CN}  market for   Cut-off, U                                                     | 53750000 | kWh | Ecoinvent | 3.9.1 |
| <b>6. End of Life</b>                                                                                      |          |     |           |       |
| Municipal solid waste (waste scenario) {CN}  Treatment of waste   Cut-off, U                               | 100      | %   | Ecoinvent | 3.9.1 |
| <b>6.1 Decommissioning &amp; Dismantling</b>                                                               |          |     |           |       |
| Diesel, burned in building machine {GLO}  diesel, burned in building machine   Cut-off, U                  | 38340000 | MJ  | Primary   |       |
| Petrol, unleaded, burned in machinery {GLO}  market for petrol, unleaded, burned in machinery   Cut-off, U | 6900000  | MJ  | data and  |       |
| Electricity, low voltage {CN}  market for   Cut-off, U                                                     | 1800000  | kWh | Ecoinvent | 3.9.1 |

Prior to the C&I and disposal stages, this study investigated the true transportation distances from manufacturing plants to deliver the PV Module, Combiner, Inverter and transformer to the site. The materials for the civil works were obtained from the nearest location, the Gonghe of Qinghai, China. All the other equipment was obtained from within 1000km around the electricity generation system, which was taken as 1000km for this study.

**Table S9 The PV systems equipment transportation distance and production location.**

| PV Systems        | Transportation/km  |                 | PV Module     |                 | Combiner         |                 | Inverter                  |  | Transformer      |               | Integrated inverter and transformer |                 | Civil Works |  | The other equipment |  |
|-------------------|--------------------|-----------------|---------------|-----------------|------------------|-----------------|---------------------------|--|------------------|---------------|-------------------------------------|-----------------|-------------|--|---------------------|--|
|                   |                    |                 |               |                 |                  |                 |                           |  |                  |               |                                     |                 |             |  |                     |  |
| <b>P20MW2013A</b> | 2200               |                 | 2247          |                 | 2247             |                 | 1804                      |  | /                |               | 12                                  |                 | 1000        |  |                     |  |
|                   | (Changzhou, China) | Jiangsu, China) | (Wuxi, China) | Jiangsu, China) | (Wuxi, China)    | Jiangsu, China) | (Taian, Shandong, China)  |  |                  |               | (Gonghe, China)                     | Qinghai, China) |             |  |                     |  |
| <b>P50MW2013B</b> | 2200               |                 | 2247          |                 | 2247             |                 | 2489                      |  | /                |               | 12                                  |                 | 1000        |  |                     |  |
|                   | (Changzhou, China) | Jiangsu, China) | (Wuxi, China) | Jiangsu, China) | (Wuxi, China)    | Jiangsu, China) | (Ningbo, Zhejiang, China) |  |                  |               | (Gonghe, China)                     | Qinghai, China) |             |  |                     |  |
| <b>P50MW2013C</b> | 2200               |                 | 2247          |                 | 694              |                 | 2489                      |  | /                |               | 12                                  |                 | 1000        |  |                     |  |
|                   | (Changzhou, China) | Jiangsu, China) | (Wuxi, China) | Jiangsu, China) | (Jiuquan, China) | Gansu, China)   | (Ningbo, Zhejiang, China) |  |                  |               | (Gonghe, China)                     | Qinghai, China) |             |  |                     |  |
| <b>P25MW2016</b>  | 2200               |                 | 2247          |                 | 2247             |                 | 1804                      |  | /                |               | 12                                  |                 | 1000        |  |                     |  |
|                   | (Changzhou, China) | Jiangsu, China) | (Wuxi, China) | Jiangsu, China) | (Wuxi, China)    | Jiangsu, China) | (Taian, Shandong, China)  |  |                  |               | (Gonghe, China)                     | Qinghai, China) |             |  |                     |  |
| <b>P50MW2021</b>  | 2228               |                 | 2275          |                 | /                |                 | /                         |  | 722              |               | 40                                  |                 | 1000        |  |                     |  |
|                   | (Changzhou, China) | Jiangsu, China) | (Wuxi, China) | Jiangsu, China) |                  |                 |                           |  | (Jiuquan, China) | Gansu, China) | (Gonghe, China)                     | Qinghai, China) |             |  |                     |  |
| <b>P500MW2023</b> | 2208               |                 | 2253          |                 | 2253             |                 | 702                       |  | 702              |               | 20                                  |                 | 1000        |  |                     |  |
|                   | (Changzhou, China) | Jiangsu, China) | (Wuxi, China) | Jiangsu, China) | (Wuxi, China)    | Jiangsu, China) | (Jiuquan, Gansu, China)   |  | (Jiuquan, China) | Gansu, China) | (Gonghe, China)                     | Qinghai, China) |             |  |                     |  |

**Table S10 Specifications and quantities of combiners, inverters and transformers for PV systems.**

| Specification (quantity)<br>PV System | Combiner        | Inverter     | Transformer | Integrated inverter and transformer |
|---------------------------------------|-----------------|--------------|-------------|-------------------------------------|
| <b>P20MW2013A</b>                     | 1000V DC (320)  | 500kW (40)   | 1000kW (20) | /                                   |
| <b>P50MW2013B</b>                     | 1000V DC (700)  | 500kW (100)  | 1000kW (50) | /                                   |
| <b>P50MW2013C</b>                     | 1000V DC (800)  | 500kW (100)  | 1000kW (50) | /                                   |
| <b>P25MW2016</b>                      | 1000V DC (276)  | 1000kW (23)  | 1000kW (23) | /                                   |
| <b>P50MW2021</b>                      | 1500V DC (182)  | /            | /           | 3150kW (14)                         |
| <b>P500MW2023</b>                     | 1500V DC (1120) | 225kW (1120) | 3150kW (78) | 3150kW (80)                         |

### 3 Results

#### 3.1 Contribution Analysis

The CED of each component in the life cycle of the PV systems is shown in **Table S11**, and the GHG impact is shown in **Table S12**.

**Table S11 CED (TJ/MW) during the life cycle of PV systems.**

| <div><div></div><div>Life cycle stages</div></div> <div>PV systems</div> | Total | PV Module | BOS   |                    |       |      |      |             | Transportation | O&M  | EoL  |      |
|--------------------------------------------------------------------------|-------|-----------|-------|--------------------|-------|------|------|-------------|----------------|------|------|------|
|                                                                          |       |           | Total | Mounting Structure | C&I&T | ETL  | OAS  | Civil Works |                |      |      |      |
| P20MW2013A                                                               | 26.30 | 14.42     | 8.16  | 2.88               | 0.91  | 1.17 | 0.53 | 2.67        | 1.03           | 2.41 | 0.29 |      |
| P50MW2013B                                                               | 24.04 | 14.42     | 7.23  | 2.86               | 0.90  | 1.19 | 0.32 | 1.96        | 1.01           | 1.09 | 0.29 |      |
| P50MW2013C                                                               | 24.06 | 14.42     | 7.51  | 2.87               | 0.91  | 0.91 | 0.52 | 2.31        | 0.98           | 0.77 | 0.39 |      |
| P25MW2016                                                                | 19.95 | 12.22     | 5.02  | 1.99               | 0.47  | 0.71 | 0.33 | 1.53        | 0.81           | 1.63 | 0.26 |      |
| P50MW2021                                                                | 18.88 | 15.89     | 1.85  | 0.75               | 0.22  | 0.28 | 0.17 | 0.44        | 0.50           | 0.45 | 0.18 |      |
| P500MW2023                                                               | 21.49 | 16.97     | 2.84  | 1.65               | 0.24  | 0.32 | 0.10 | 0.54        | 0.60           | 0.93 | 0.15 |      |
| P500MW2023+ESS                                                           | 22.88 | 16.97     | 2.84  | 1.65               | 0.24  | 0.32 | 0.10 | 0.54        | 0.63           | 0.93 | 0.15 |      |
|                                                                          |       |           |       |                    |       |      |      |             |                |      |      | ESS  |
|                                                                          |       |           |       |                    |       |      |      |             |                |      |      | 1.35 |

**Table S12 GHG emissions (gCO<sub>2</sub>-eq/kWh) during the life cycle of PV systems.**

| Photovoltaics Plants | Life cycle stages | Total | PV Module | BOS   |                    |       |      |      |             | Transportation | O&M  | EoL  |
|----------------------|-------------------|-------|-----------|-------|--------------------|-------|------|------|-------------|----------------|------|------|
|                      |                   |       |           | Total | Mounting Structure | C&I&T | ETL  | OAS  | Civil Works |                |      |      |
|                      | P20MW2013A        | 54.68 | 25.12     | 17.77 | 6.14               | 1.88  | 1.86 | 0.98 | 6.91        | 1.83           | 6.42 | 3.55 |
| P50MW2013B           | 48.42             | 25.12 | 15.65     | 6.10  | 1.86               | 1.92  | 0.59 | 5.18 | 1.80        | 2.75           | 3.09 |      |
| P50MW2013C           | 48.52             | 25.12 | 16.28     | 6.11  | 1.87               | 1.42  | 0.86 | 6.02 | 1.74        | 1.85           | 3.53 |      |
| P25MW2016            | 38.84             | 20.30 | 10.76     | 4.03  | 0.92               | 1.24  | 0.56 | 4.02 | 1.37        | 4.07           | 2.34 |      |
| P50MW2021            | 32.54             | 25.85 | 3.55      | 1.49  | 0.42               | 0.35  | 0.29 | 1.01 | 0.82        | 1.05           | 1.26 |      |
| P500MW2023           | 35.76             | 25.96 | 5.37      | 3.06  | 0.43               | 0.44  | 0.17 | 1.27 | 0.93        | 2.24           | 1.26 |      |
| P500MW2023+ESS       | 35.03             | 23.74 | 4.91      | 2.80  | 0.40               | 0.40  | 0.16 | 1.16 | 0.90        | 2.05           | 1.27 | 2.16 |

3.2 Uncertainty Analysis

The GHG impacts and CED of uncertainty analysis of six large-scale PV systems. Monte Carlo method is used by 1000 iterations with 95% confidence intervals. (see Fig. S4) The uncertainty analysis results of the CED and GHG impacts of the PV systems in this study, such as mean, median, lower range, upper range, SD, CV and SEM, are shown in Table S13 and Table S14, respectively.

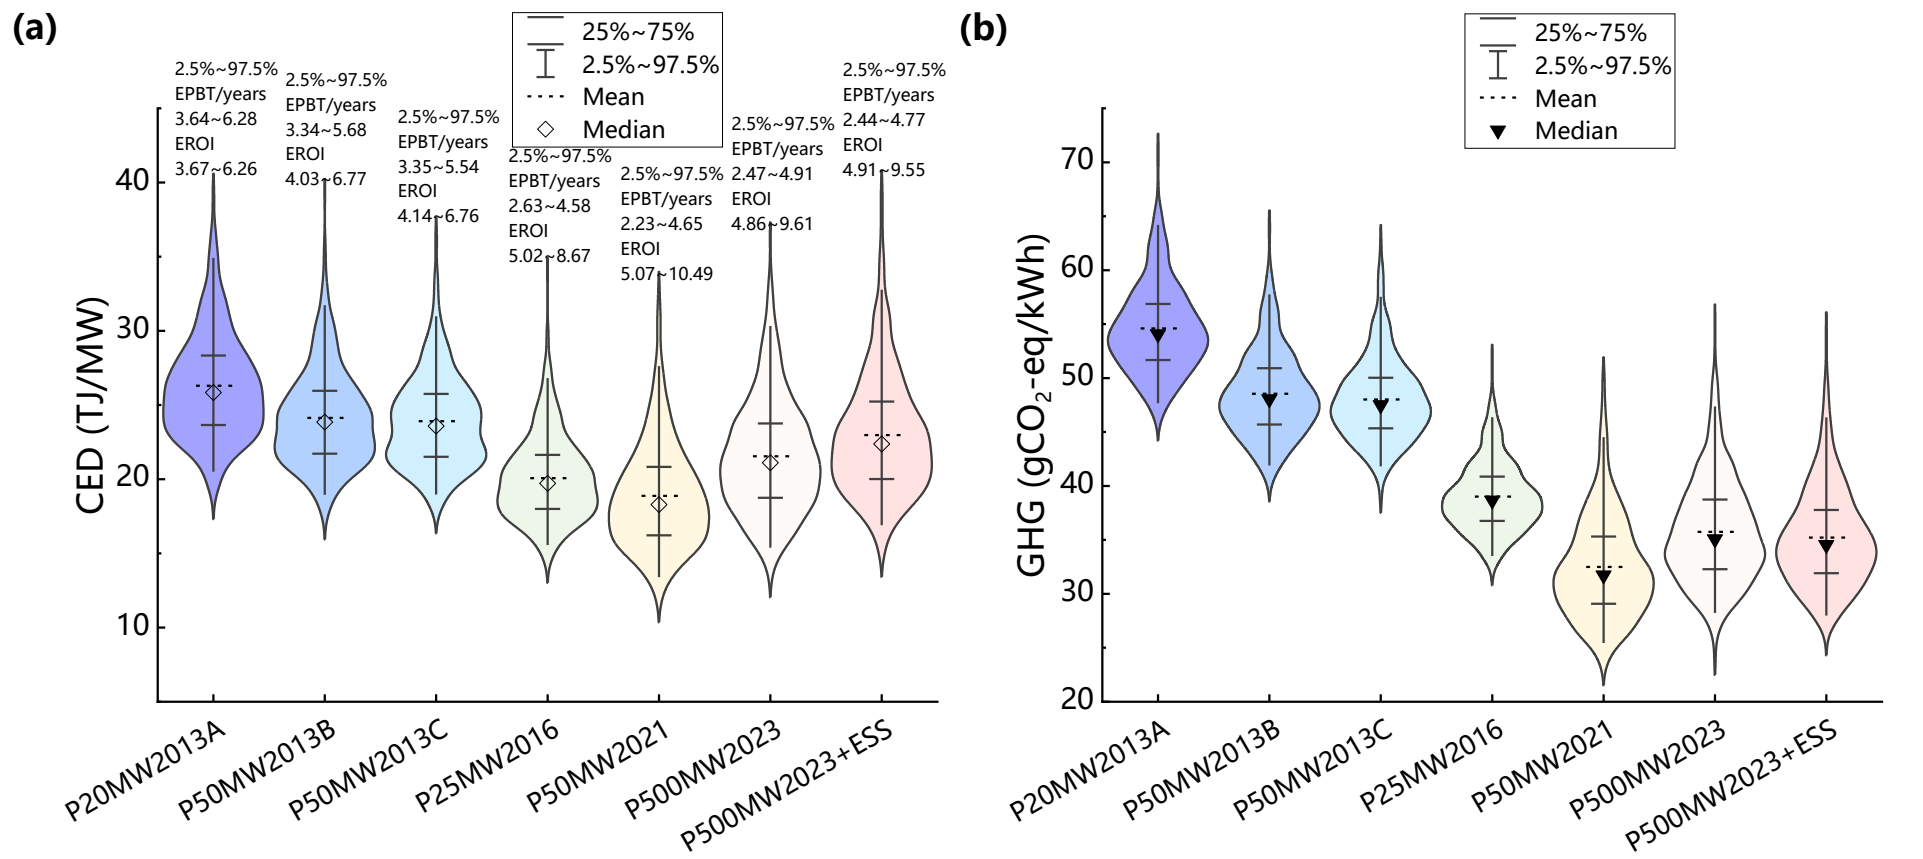

Fig. S4. Uncertainty analysis of six large-scale PV systems. (a) Uncertainty analyses for CED and the range of EPBT and EROI values within the upper and lower ranges (2.5%~97.5%). (b) Uncertainty analysis for GHG impacts.

**Table S13 Uncertainty analysis results of CED impacts.**

| Photovoltaics systems | Impact category | Mean  | Median | Lower range - upper range (2.5%-97.5%) | SD   | CV/%  | SEM    |
|-----------------------|-----------------|-------|--------|----------------------------------------|------|-------|--------|
|                       |                 | TJ/MW | TJ/MW  | TJ/MW                                  |      |       |        |
| P20MW2013A            | CED             | 26.30 | 25.84  | 20.49-34.92                            | 3.71 | 14.12 | 0.1174 |
| P50MW2013B            |                 | 24.14 | 23.85  | 18.93-31.80                            | 3.34 | 13.84 | 0.1056 |
| P50MW2013C            |                 | 23.92 | 23.59  | 18.97-31.01                            | 3.21 | 13.44 | 0.1017 |
| P25MW2016             |                 | 20.07 | 19.71  | 15.56-26.86                            | 2.91 | 14.50 | 0.0920 |
| P50MW2021             |                 | 18.88 | 18.29  | 13.38-27.68                            | 3.66 | 19.40 | 0.1158 |
| P500MW2023            |                 | 21.55 | 21.11  | 15.34-30.35                            | 3.89 | 18.07 | 0.1231 |
| P500MW2023+ESS        |                 | 22.97 | 22.38  | 16.87-32.80                            | 4.07 | 17.71 | 0.1286 |

**Table S14 Uncertainty analysis results of GHG impacts.**

| Photovoltaics systems | Impact category | Mean                     | Median                   | Lower range - upper range (2.5%-97.5%) | SD   | CV/%  | SEM    |
|-----------------------|-----------------|--------------------------|--------------------------|----------------------------------------|------|-------|--------|
|                       |                 | gCO <sub>2</sub> -eq/kWh | gCO <sub>2</sub> -eq/kWh | gCO <sub>2</sub> -eq/kWh               |      |       |        |
| P20MW2013A            | GHG             | 54.61                    | 54.07                    | 47.68-64.21                            | 4.28 | 7.83  | 0.1352 |
| P50MW2013B            |                 | 48.55                    | 48.04                    | 41.90-57.86                            | 4.14 | 8.53  | 0.1309 |
| P50MW2013C            |                 | 48.01                    | 47.50                    | 41.81-57.60                            | 3.86 | 8.05  | 0.1222 |
| P25MW2016             |                 | 39.01                    | 38.65                    | 33.50-46.46                            | 3.34 | 8.55  | 0.1055 |
| P50MW2021             |                 | 32.50                    | 31.73                    | 25.43-44.54                            | 4.85 | 14.91 | 0.1532 |
| P500MW2023            |                 | 35.74                    | 35.07                    | 28.16-47.38                            | 4.86 | 13.61 | 0.1538 |
| P500MW2023+ESS        |                 | 35.21                    | 34.54                    | 27.98-46.39                            | 4.64 | 13.17 | 0.1466 |

### 3.3 Sensitivity Analysis

In both the sensitivity and scenario analysis, the assumptions about the parameter ranges are based on the current state of technological and managerial advances in the PV industry, as well as on forecasts of future developments. Specifically, (i) the market generally accepts a financing model with a PV system lifetime of 35 years<sup>14</sup>, with 30-40 years of lifetime<sup>15</sup> providing considerable environmental benefits. Therefore, we adopt a 35/40 years dual parameter setting with the aim of examining the impact of lifetime extension on the full life cycle GHG emissions and energy payback of the PV systems. (ii) Current cell manufacturing processes, mainly through multi-busbar technology and reduced busbar width, can reduce silver consumption by 40.6%-54.6%.<sup>16</sup> Therefore, a 50% reduction is used as the range of silver usage reduction due to technological advances. (iii) The assumption of -50% Low alloy steel stems from the technological iteration of PV mounting structures: the new flexible and flat single axis brackets can achieve a significant reduction in the amount of low alloy steel under the premise of maintaining the structural stiffness through topology optimization design, as shown in Fig. 2a for the mounting structure of the CED. Therefore, the range of 50 % reduction in low alloy steel consumption is adopted. (iv) The ranges of PV module efficiency and wafer thickness parameters are reasonable assumptions based on the development roadmap of the Chinese PV industry released by the China Photovoltaic Industry Association (CPIA) over the years.<sup>17</sup> (v) The parameter ranges for the curtailment rate and performance ratio are assumed to be based on real local power plant operations and ideal conditions. It is important to note that all assumptions are based on a steady-state technology analysis framework, with the time dimension implicit in the range of technological advances.

The base case values of sensitivity analysis are shown in **Table S15**.

**Table S15 The base case values of sensitivity analysis.**

| <div> <div>PV systems</div> <div>variables</div> </div> |                                  | P20MW2013A       | P50MW2013B | P50MW2013C | P25MW2016  | P50MW2021  | P500MW2023 | P500MW2023+ESS |
|---------------------------------------------------------|----------------------------------|------------------|------------|------------|------------|------------|------------|----------------|
|                                                         |                                  | Base case values |            |            |            |            |            |                |
| Fig. 3                                                  | PV module efficiency/%           | 14.98            | 14.98      | 14.98      | 16.20      | 20.89      | 21.10      | 21.10          |
|                                                         | Disposal scenario                | MSWS of CN       | MSWS of CN | MSWS of CN | MSWS of CN | MSWS of CN | MSWS of CN | MSWS of CN     |
|                                                         | Lifetime/years                   | 25               | 25         | 25         | 25         | 25         | 25         | 25             |
| Fig. S7                                                 | silicon wafer thickness/ $\mu$ m | 200              | 200        | 200        | 185        | 170        | 150        | 150            |
|                                                         | mass change of silver/%          | 0                | 0          | 0          | 0          | 0          | 0          | 0              |
| Fig. S8                                                 | mass change of low alloy steel/% | 0                | 0          | 0          | 0          | 0          | 0          | 0              |
|                                                         | mass change of concrete/%        | 0                | 0          | 0          | 0          | 0          | 0          | 0              |
| Fig. S9                                                 | curtailment rate/%               | 8                | 8          | 8          | 8          | 8          | 8          | 8              |
|                                                         | performance ratio                | 0.799            | 0.799      | 0.799      | 0.802      | 0.834      | 0.823      | 0.823          |

**Fig. S5** shows the sensitivity analysis of silicon wafer thickness and mass change of silver on PV module. **Fig. S6** shows the sensitivity analysis of mass change of low alloy steel on mounting structure and mass change of concrete on civil works. **Fig. S7** shows the sensitivity analysis of curtailment rate and performance ratio on PV systems.

The raw data and fitting results for all the sensitivity analyses in this study are shown in the **Tables S16 – S38**, and the fits are replicated.

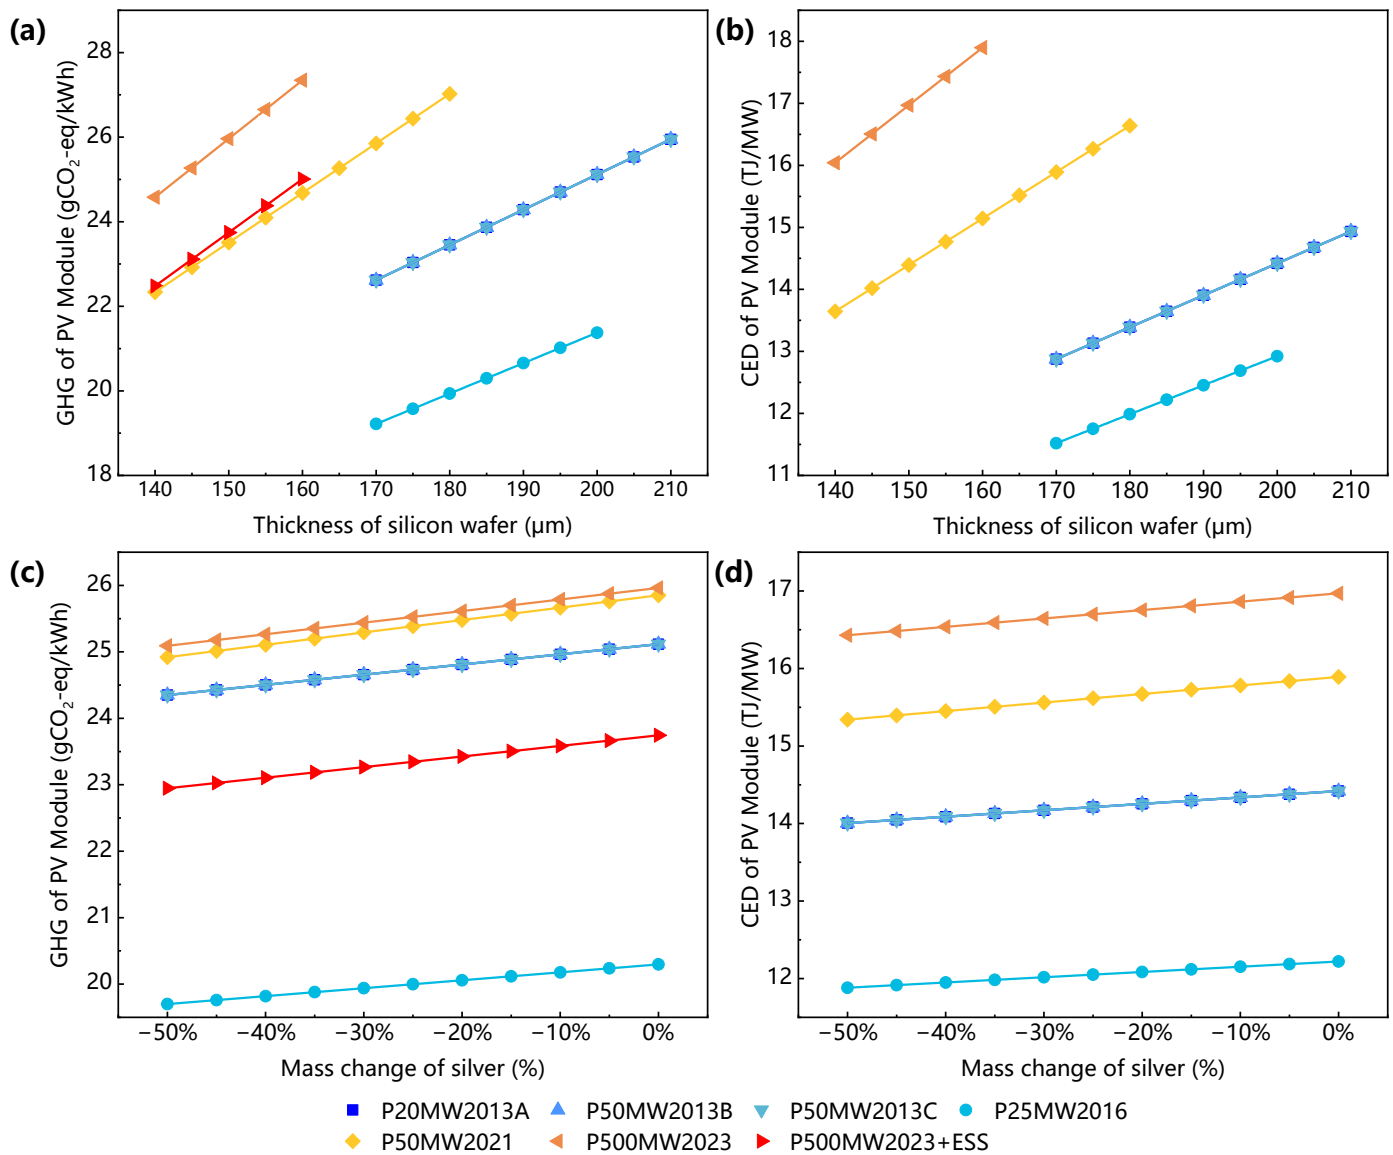

**Fig. S5.** The sensitivity analysis results on silicon wafer thickness variation for (a) GHG and (b) CED of PV module. The sensitivity analysis results on mass change of silver on PV module for (c) GHG and (d) CED of PV module.

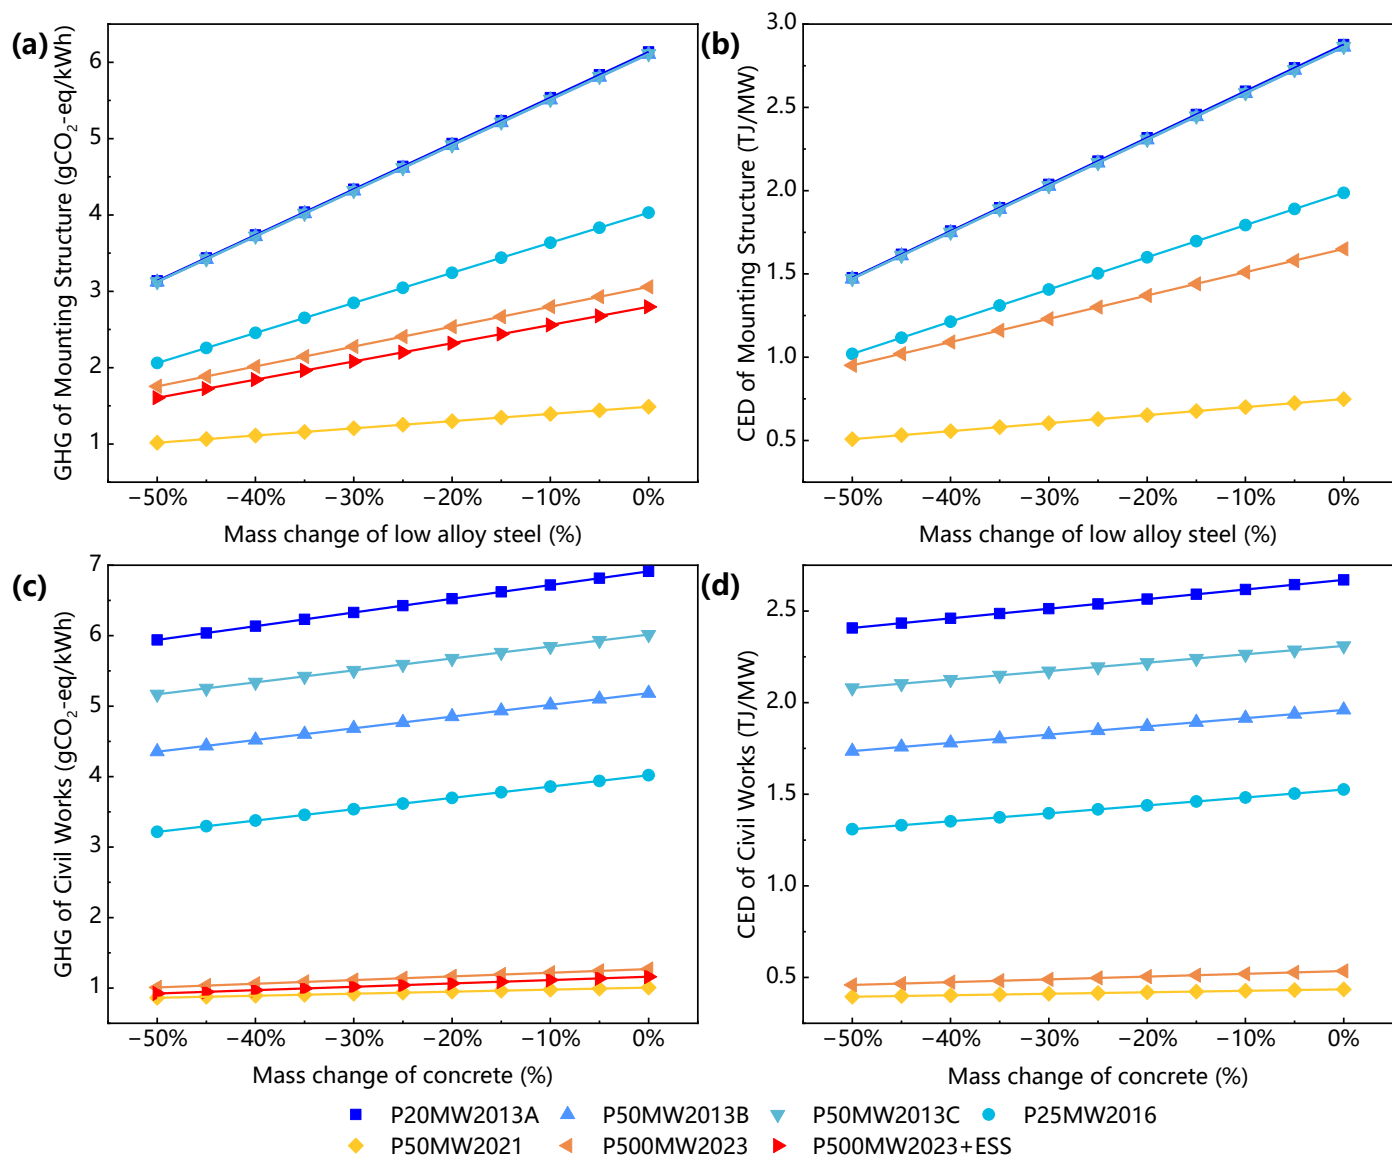

**Fig. S6.** The sensitivity analysis results on mass change of low alloy steel for (a) GHG and (b) CED of mounting structure. The sensitivity analysis results on mass change of concrete for (c) GHG and (d) CED of civil works.

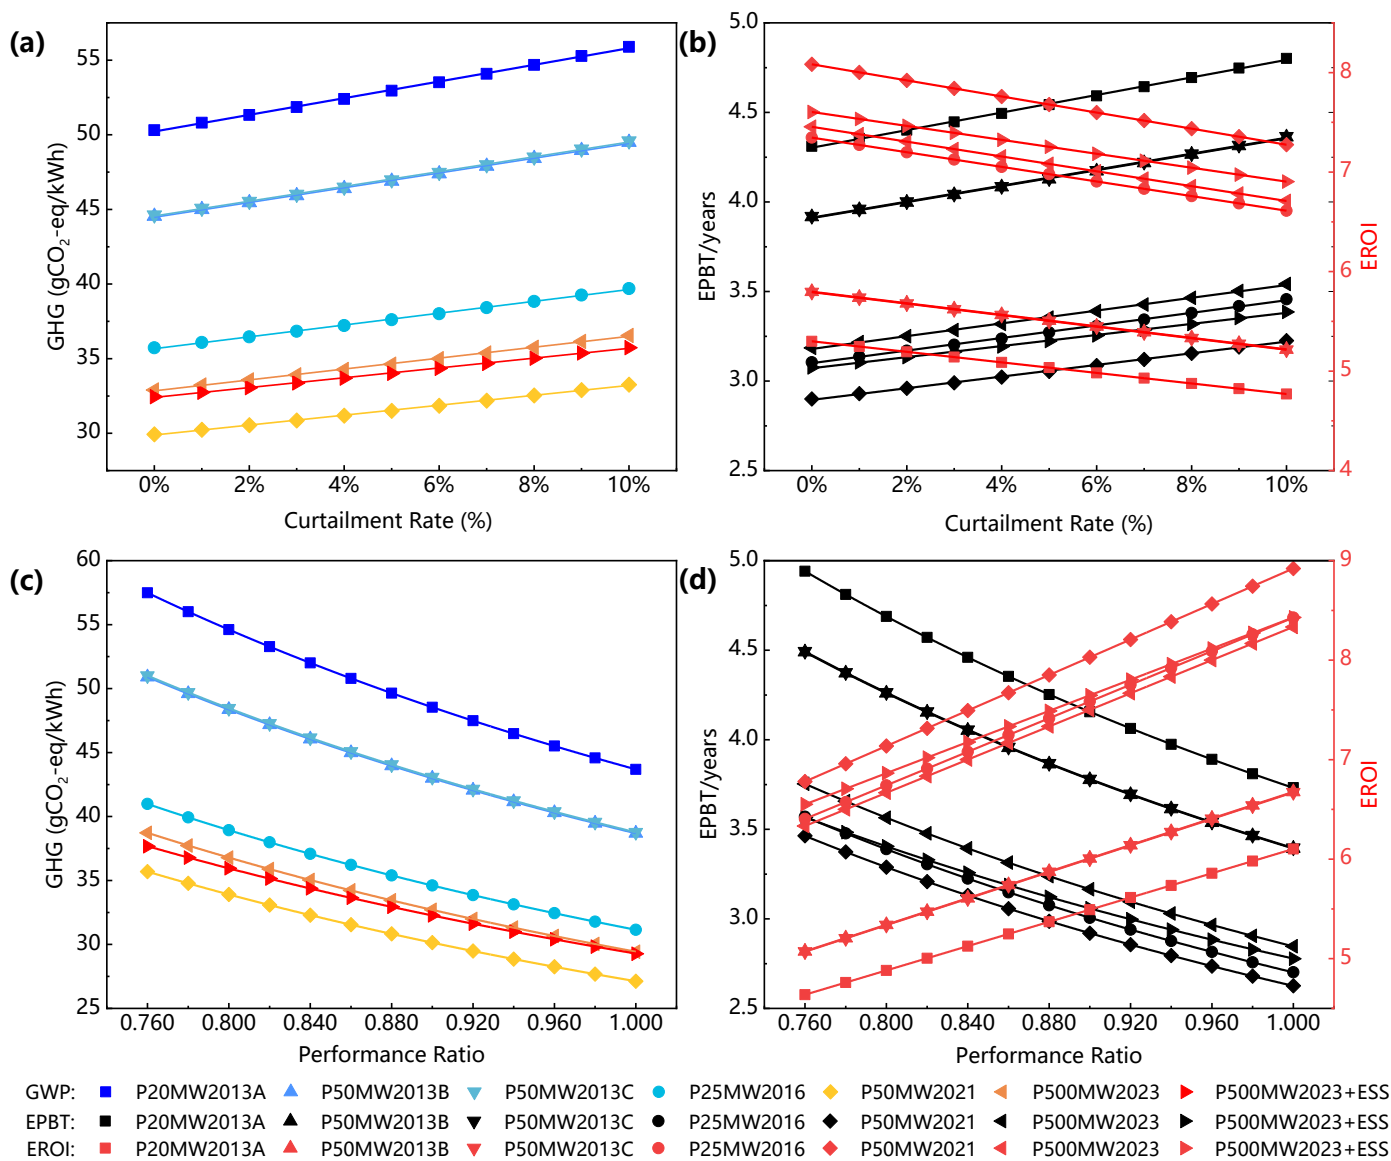

**Fig. S7.** The sensitivity analysis results on the curtailment rate for (a) GHG, (b) EPBT and EROI of PV systems lifecycle. The sensitivity analysis results on the performance ratio for (c) GHG, (d) EPBT and EROI of PV systems lifecycle.

**Table S16 Data and fitting results for sensitivity of PV module efficiency change to GHG (gCO<sub>2</sub>-eq/kWh) of PV systems.**

| PV systems<br>Efficiency/% | P20MW2013A       | P50MW2013B       | P50MW2013C       | P25MW2016        | P50MW2021        | P500MW2023       | P500MW2023+ESS        |
|----------------------------|------------------|------------------|------------------|------------------|------------------|------------------|-----------------------|
| 15%                        | 54.60618         | 48.35726         | 48.45165         |                  |                  |                  |                       |
| 16%                        | 51.1933          | 45.33493         | 45.42342         | 39.32141         |                  |                  |                       |
| 17%                        | 48.18193         | 42.66817         | 42.75145         | 37.00838         |                  |                  |                       |
| 18%                        | 45.50515         | 40.29772         | 40.37637         | 34.95236         |                  |                  |                       |
| 19%                        | 43.11014         | 38.17678         | 38.2513          | 33.11276         |                  |                  |                       |
| 20%                        | 40.95464         | 36.26795         | 36.33873         | 31.45713         | 33.98787         |                  |                       |
| 21%                        | 39.00442         | 34.5409          | 34.60832         | 29.95917         | 32.3694          | 35.93245         | 35.1842               |
| 22%                        | 37.23149         | 32.97086         | 33.03521         | 28.59739         | 30.89806         | 34.29916         | 33.71643              |
| 23%                        | 35.61273         | 31.53734         | 31.5989          | 27.35402         | 29.55467         | 32.80789         | 32.36622              |
| 24%                        |                  |                  |                  |                  | 28.32322         | 31.4409          | 31.11999              |
| 25%                        |                  |                  |                  |                  | 27.19029         | 30.18326         | 29.96617              |
| 26%                        |                  |                  |                  |                  | 26.14451         | 29.02237         | 28.89485              |
| 27%                        |                  |                  |                  |                  | 25.1762          | 27.94746         | 27.89749              |
| Fitting                    | $y=8.1909x^{-1}$ | $y=7.2536x^{-1}$ | $y=7.2678x^{-1}$ | $y=6.2914x^{-1}$ | $y=6.7976x^{-1}$ | $y=7.5458x^{-1}$ | $y=8.3330x^{-0.9231}$ |
| R <sup>2</sup>             | 1                | 1                | 1                | 1                | 1                | 1                | 1                     |

**Table S17 Data and fitting results for sensitivity of PV module efficiency change to EPBT (years) of PV systems.**

| PV systems<br>Efficiency/% | P20MW2013A            | P50MW2013B            | P50MW2013C            | P25MW2016             | P50MW2021             | P500MW2023            | P500MW2023+ESS        |
|----------------------------|-----------------------|-----------------------|-----------------------|-----------------------|-----------------------|-----------------------|-----------------------|
| 15%                        | 4.688156              | 4.259777              | 4.263146              |                       |                       |                       |                       |
| 16%                        | 4.388535              | 3.997489              | 3.990223              | 3.423403              |                       |                       |                       |
| 17%                        | 4.124163              | 3.756769              | 3.751827              | 3.218559              |                       |                       |                       |
| 18%                        | 3.890318              | 3.542797              | 3.53992               | 3.036475              |                       |                       |                       |
| 19%                        | 3.682245              | 3.351348              | 3.350319              | 2.874614              |                       |                       |                       |
| 20%                        | 3.494979              | 3.179044              | 3.179678              | 2.729213              | 3.296601              |                       |                       |
| 21%                        | 3.325547              | 3.02315               | 3.025289              | 2.59766               | 3.137989              | 3.480873              | 3.333101              |
| 22%                        | 3.171519              | 2.883872              | 2.886121              | 2.478066              | 2.993831              | 3.321382              | 3.195132              |
| 23%                        | 3.030884              | 2.757142              | 2.759293              | 2.368872              | 2.862924              | 3.175759              | 3.068043              |
| 24%                        |                       |                       |                       |                       | 2.742926              | 3.042272              | 2.950805              |
| 25%                        |                       |                       |                       |                       | 2.632528              | 2.919837              | 2.842406              |
| 26%                        |                       |                       |                       |                       | 2.530622              | 2.807001              | 2.741654              |
| 27%                        |                       |                       |                       |                       | 2.436265              | 2.702523              | 2.647767              |
| Fitting                    | $y=0.6766x^{-1.0202}$ | $y=0.6149x^{-1.0209}$ | $y=0.6178x^{-1.0180}$ | $y=0.5333x^{-1.0145}$ | $y=0.6513x^{-1.0076}$ | $y=0.7226x^{-1.0073}$ | $y=0.7986x^{-0.9157}$ |
| R <sup>2</sup>             | 1                     | 1                     | 1                     | 1                     | 1                     | 1                     | 1                     |

**Table S18 Data and fitting results for sensitivity of PV module efficiency change to EROI of PV systems.**

| PV systems<br>Efficiency/% | P20MW2013A   | P50MW2013B   | P50MW2013C   | P25MW2016    | P50MW2021    | P500MW2023   | P500MW2023+ESS      |
|----------------------------|--------------|--------------|--------------|--------------|--------------|--------------|---------------------|
| 15%                        | 4.882369     | 5.341482     | 5.337363     |              |              |              |                     |
| 16%                        | 5.20786      | 5.697581     | 5.693187     | 6.675463     |              |              |                     |
| 17%                        | 5.533351     | 6.05368      | 6.049011     | 7.09268      |              |              |                     |
| 18%                        | 5.858842     | 6.409778     | 6.404835     | 7.509896     |              |              |                     |
| 19%                        | 6.184334     | 6.765877     | 6.76066      | 7.927113     |              |              |                     |
| 20%                        | 6.509825     | 7.121976     | 7.116484     | 8.344329     | 7.119993     |              |                     |
| 21%                        | 6.835316     | 7.478075     | 7.472308     | 8.761546     | 7.475993     | 6.826362     | 7.013545            |
| 22%                        | 7.160807     | 7.834174     | 7.828132     | 9.178762     | 7.831992     | 7.151427     | 7.318863            |
| 23%                        | 7.486299     | 8.190272     | 8.183956     | 9.595979     | 8.187992     | 7.476492     | 7.624181            |
| 24%                        |              |              |              |              | 8.543991     | 7.801557     | 7.9295              |
| 25%                        |              |              |              |              | 8.899991     | 8.126622     | 8.234818            |
| 26%                        |              |              |              |              | 9.255991     | 8.451687     | 8.540137            |
| 27%                        |              |              |              |              | 9.61199      | 8.776752     | 8.845455            |
| Fitting                    | $y=32.5491x$ | $y=35.6099x$ | $y=35.5824x$ | $y=41.7217x$ | $y=35.6000x$ | $y=32.5065x$ | $y=30.5318x+0.6019$ |
| R <sup>2</sup>             | 1            | 1            | 1            | 1            | 1            | 11           | 1                   |

**Table S19 Data and fitting results for sensitivity of silicon wafer thickness variation to GHG (gCO<sub>2</sub>-eq/kWh) of PV modules.**

| PV systems<br>μm | P20MW2013A         | P50MW2013B         | P50MW2013C         | P25MW2016          | P50MW2021          | P500MW2023         | P500MW2023+ESS     |
|------------------|--------------------|--------------------|--------------------|--------------------|--------------------|--------------------|--------------------|
| 140              |                    |                    |                    |                    | 22.33703           | 24.5795            | 22.47939           |
| 145              |                    |                    |                    |                    | 22.92283           | 25.27101           | 23.11182           |
| 150              |                    |                    |                    |                    | 23.50863           | 25.96253           | 23.74425           |
| 155              |                    |                    |                    |                    | 24.09443           | 26.65404           | 24.37668           |
| 160              |                    |                    |                    |                    | 24.68023           | 27.34556           | 25.00911           |
| 165              |                    |                    |                    |                    | 25.26603           |                    |                    |
| 170              | 22.61873           | 22.6202            | 22.61871           | 19.21693           | 25.85184           |                    |                    |
| 175              | 23.03499           | 23.03645           | 23.03497           | 19.57688           | 26.43764           |                    |                    |
| 180              | 23.45125           | 23.45271           | 23.45123           | 19.93682           | 27.02344           |                    |                    |
| 185              | 23.8675            | 23.86897           | 23.86748           | 20.29676           |                    |                    |                    |
| 190              | 24.28376           | 24.28523           | 24.28374           | 20.65671           |                    |                    |                    |
| 195              | 24.70001           | 24.70149           | 24.7               | 21.01665           |                    |                    |                    |
| 200              | 25.11627           | 25.11775           | 25.11626           | 21.37659           |                    |                    |                    |
| 205              | 25.53253           | 25.53401           | 25.53252           |                    |                    |                    |                    |
| 210              | 25.94878           | 25.95026           | 25.94878           |                    |                    |                    |                    |
| Fitting          | $y=0.0833x+8.4660$ | $y=0.0833x+8.4674$ | $y=0.0833x+8.4659$ | $y=0.0720x+6.9789$ | $y=0.1172x+5.9346$ | $y=0.1383x+5.2171$ | $y=0.1265x+4.7713$ |
| R <sup>2</sup>   | 1                  | 1                  | 1                  | 1                  | 1                  | 1                  | 1                  |

**Table S20 Data and fitting results for sensitivity of silicon wafer thickness variation to CED (TJ/MW) of PV modules.**

| PV systems<br>μm | P20MW2013A         | P50MW2013B       | P50MW2013C       | P25MW2016        | P50MW2021        | P500MW2023       |
|------------------|--------------------|------------------|------------------|------------------|------------------|------------------|
| 140              |                    |                  |                  |                  | 13.6444          | 16.04176         |
| 145              |                    |                  |                  |                  | 14.01886         | 16.50584         |
| 150              |                    |                  |                  |                  | 14.39333         | 16.96992         |
| 155              |                    |                  |                  |                  | 14.76779         | 17.43401         |
| 160              |                    |                  |                  |                  | 15.14226         | 17.89809         |
| 165              |                    |                  |                  |                  | 15.51672         |                  |
| 170              | 12.87523           | 12.87598         | 12.87514         | 11.51895         | 15.89119         |                  |
| 175              | 13.13256           | 13.13332         | 13.13247         | 11.75286         | 16.26565         |                  |
| 180              | 13.38989           | 13.39065         | 13.38981         | 11.98677         | 16.64012         |                  |
| 185              | 13.64723           | 13.64799         | 13.64714         | 12.22068         |                  |                  |
| 190              | 13.90456           | 13.90532         | 13.90448         | 12.45459         |                  |                  |
| 195              | 14.1619            | 14.16266         | 14.16181         | 12.6885          |                  |                  |
| 200              | 14.41923           | 14.41999         | 14.41915         | 12.92241         |                  |                  |
| 205              | 14.67657           | 14.67733         | 14.67648         |                  |                  |                  |
| 210              | 14.9339            | 14.93466         | 14.93381         |                  |                  |                  |
| Fitting          | $y=0.0515x+4.1259$ | $0.0515x+4.1266$ | $0.0515x+4.1258$ | $0.0468x+3.5660$ | $0.0749x+3.1594$ | $0.0928x+3.0475$ |
| R <sup>2</sup>   | 1                  | 1                | 1                | 1                | 1                | 1                |

**Table S21 Data and fitting results for sensitivity of silver usage variation to GHG (gCO<sub>2</sub>-eq/kWh) of PV modules.**

| PV systems<br>change | P20MW2013A          | P50MW2013B          | P50MW2013C          | P25MW2016           | P50MW2021           | P500MW2023          | P500MW2023+ESS      |
|----------------------|---------------------|---------------------|---------------------|---------------------|---------------------|---------------------|---------------------|
| -50%                 | 24.34955            | 24.35103            | 24.34954            | 19.69966            | 24.9196             | 25.09071            | 22.94692            |
| -45%                 | 24.42623            | 24.4277             | 24.42621            | 19.75937            | 25.01282            | 25.17789            | 23.02665            |
| -40%                 | 24.5029             | 24.50437            | 24.50288            | 19.81908            | 25.10605            | 25.26508            | 23.10639            |
| -35%                 | 24.57957            | 24.58104            | 24.57956            | 19.87879            | 25.19927            | 25.35226            | 23.18612            |
| -30%                 | 24.65624            | 24.65772            | 24.65623            | 19.9385             | 25.29249            | 25.43944            | 23.26585            |
| -25%                 | 24.73291            | 24.73439            | 24.7329             | 19.99821            | 25.38572            | 25.52662            | 23.34558            |
| -20%                 | 24.80958            | 24.81106            | 24.80957            | 20.05792            | 25.47894            | 25.6138             | 23.42532            |
| -15%                 | 24.88626            | 24.88773            | 24.88624            | 20.11763            | 25.57216            | 25.70098            | 23.50505            |
| -10%                 | 24.96293            | 24.9644             | 24.96292            | 20.17734            | 25.66539            | 25.78817            | 23.58478            |
| -5%                  | 25.0396             | 25.04108            | 25.03959            | 20.23705            | 25.75861            | 25.87535            | 23.66452            |
| 0                    | 25.11627            | 25.11775            | 25.11626            | 20.29676            | 25.85184            | 25.96253            | 23.74425            |
| Fitting              | $y=1.5334x+25.1163$ | $y=1.5334x+25.1178$ | $y=1.5334x+25.1163$ | $y=1.1942x+20.2968$ | $y=1.8645x+25.8518$ | $y=1.7436x+25.9625$ | $y=1.5947x+23.7443$ |
| R <sup>2</sup>       | 1                   | 1                   | 1                   | 1                   | 1                   | 1                   | 1                   |

**Table S22 Data and fitting results for sensitivity of silver usage variation to CED (TJ/MW) of PV modules.**

| PV systems<br>change | P20MW2013A          | P50MW2013B          | P50MW2013C          | P25MW2016           | P50MW2021           | P500MW2023          |
|----------------------|---------------------|---------------------|---------------------|---------------------|---------------------|---------------------|
| -50%                 | 14.00511            | 14.00587            | 14.00502            | 11.88166            | 15.34005            | 16.4288             |
| -45%                 | 14.04652            | 14.04728            | 14.04643            | 11.91556            | 15.39516            | 16.48291            |
| -40%                 | 14.08793            | 14.08869            | 14.08785            | 11.94946            | 15.45027            | 16.53703            |
| -35%                 | 14.12935            | 14.13011            | 14.12926            | 11.98337            | 15.50539            | 16.59114            |
| -30%                 | 14.17076            | 14.17152            | 14.17067            | 12.01727            | 15.5605             | 16.64525            |
| -25%                 | 14.21217            | 14.21293            | 14.21208            | 12.05117            | 15.61562            | 16.69936            |
| -20%                 | 14.25358            | 14.25434            | 14.2535             | 12.08507            | 15.67073            | 16.75348            |
| -15%                 | 14.295              | 14.29576            | 14.29491            | 12.11897            | 15.72585            | 16.80759            |
| -10%                 | 14.33641            | 14.33717            | 14.33632            | 12.15288            | 15.78096            | 16.8617             |
| -5%                  | 14.37782            | 14.37858            | 14.37773            | 12.18678            | 15.83607            | 16.91581            |
| 0                    | 14.41923            | 14.41999            | 14.41915            | 12.22068            | 15.89119            | 16.96992            |
| Fitting              | $y=0.8283x+14.4192$ | $y=0.8283x+14.4200$ | $y=0.8383x+14.4192$ | $y=0.6780x+12.2207$ | $y=1.1023x+15.8912$ | $y=1.0822x+16.9699$ |
| R <sup>2</sup>       | 1                   | 1                   | 1                   | 1                   | 1                   | 1                   |

**Table S23 Data and fitting results for sensitivity of low alloy steel usage variation to GHG (gCO<sub>2</sub>-eq/kWh) of Mounting Structures.**

| PV systems<br>change | P20MW2013A         | P50MW2013B         | P50MW2013C         | P25MW2016          | P50MW2021          | P500MW2023         | P500MW2023+ESS     |
|----------------------|--------------------|--------------------|--------------------|--------------------|--------------------|--------------------|--------------------|
| -50%                 | 3.137136           | 3.12103            | 3.125015           | 2.06058            | 1.016585           | 1.754378           | 1.604481           |
| -45%                 | 3.436944           | 3.4193             | 3.423665           | 2.257504           | 1.063697           | 1.884757           | 1.723721           |
| -40%                 | 3.736753           | 3.717569           | 3.722316           | 2.454429           | 1.110809           | 2.015136           | 1.84296            |
| -35%                 | 4.036561           | 4.015839           | 4.020966           | 2.651354           | 1.157921           | 2.145516           | 1.962199           |
| -30%                 | 4.33637            | 4.314108           | 4.319616           | 2.848279           | 1.205033           | 2.275895           | 2.081439           |
| -25%                 | 4.636178           | 4.612378           | 4.618267           | 3.045204           | 1.252145           | 2.406274           | 2.200678           |
| -20%                 | 4.935987           | 4.910648           | 4.916917           | 3.242128           | 1.299257           | 2.536653           | 2.319917           |
| -15%                 | 5.235795           | 5.208917           | 5.215568           | 3.439053           | 1.346369           | 2.667032           | 2.439157           |
| -10%                 | 5.535604           | 5.507187           | 5.514218           | 3.635978           | 1.393481           | 2.797411           | 2.558396           |
| -5%                  | 5.835412           | 5.805457           | 5.812869           | 3.832903           | 1.440592           | 2.92779            | 2.677635           |
| 0%                   | 6.135221           | 6.103726           | 6.111519           | 4.029827           | 1.487704           | 3.05817            | 2.796875           |
| Fitting              | $y=5.9962x+6.1352$ | $y=5.9654x+6.1037$ | $y=5.9730x+6.1115$ | $y=3.9385x+4.0298$ | $y=0.9422x+1.4877$ | $y=2.6076x+3.0582$ | $y=2.3848x+2.7969$ |
| R <sup>2</sup>       | 1                  | 1                  | 1                  | 1                  | 1                  | 1                  | 1                  |

**Table S24 Data and fitting results for sensitivity of low alloy steel usage variation to CED (TJ/MW) of Mounting Structures.**

| PV systems<br>change | P20MW2013A         | P50MW2013B         | P50MW2013C         | P25MW2016          | P50MW2021          | P500MW2023         |
|----------------------|--------------------|--------------------|--------------------|--------------------|--------------------|--------------------|
| -50%                 | 1.47758            | 1.469986           | 1.471863           | 1.020197           | 0.508094           | 0.950946           |
| -45%                 | 1.617529           | 1.609216           | 1.61127            | 1.116825           | 0.532166           | 1.020883           |
| -40%                 | 1.757478           | 1.748445           | 1.750677           | 1.213453           | 0.556237           | 1.09082            |
| -35%                 | 1.897427           | 1.887675           | 1.890085           | 1.310081           | 0.580308           | 1.160758           |
| -30%                 | 2.037376           | 2.026905           | 2.029492           | 1.406709           | 0.604379           | 1.230695           |
| -25%                 | 2.177324           | 2.166135           | 2.1689             | 1.503337           | 0.628451           | 1.300632           |
| -20%                 | 2.317273           | 2.305364           | 2.308307           | 1.599965           | 0.652522           | 1.370569           |
| -15%                 | 2.457222           | 2.444594           | 2.447715           | 1.696593           | 0.676593           | 1.440506           |
| -10%                 | 2.597171           | 2.583824           | 2.587122           | 1.793221           | 0.700664           | 1.510443           |
| -5%                  | 2.73712            | 2.723054           | 2.72653            | 1.889849           | 0.724736           | 1.58038            |
| 0%                   | 2.877069           | 2.862283           | 2.865937           | 1.986477           | 0.748807           | 1.650317           |
| Fitting              | $y=2.7990x+2.8771$ | $y=2.7846x+2.8623$ | $y=2.7882x+2.8659$ | $y=1.9326x+1.9865$ | $y=0.4814x+0.7488$ | $y=1.3987x+1.6503$ |
| R <sup>2</sup>       | 1                  | 1                  | 1                  | 1                  | 1                  | 1                  |

**Table S25 Data and fitting results for sensitivity of concrete usage variation to GHG (gCO<sub>2</sub>-eq/kWh) of Civil Works.**

| PV systems<br>change | P20MW2013A         | P50MW2013B         | P50MW2013C         | P25MW2016          | P50MW2021          | P500MW2023         | P500MW2023+ESS     |
|----------------------|--------------------|--------------------|--------------------|--------------------|--------------------|--------------------|--------------------|
| -50%                 | 5.939952           | 4.353405           | 5.168342           | 3.215898           | 0.861711           | 1.008722           | 0.922535           |
| -45%                 | 6.037232           | 4.436474           | 5.253073           | 3.296258           | 0.876188           | 1.034769           | 0.946357           |
| -40%                 | 6.134512           | 4.519543           | 5.337804           | 3.376619           | 0.890665           | 1.060817           | 0.970179           |
| -35%                 | 6.231793           | 4.602612           | 5.422535           | 3.456979           | 0.905141           | 1.086864           | 0.994001           |
| -30%                 | 6.329073           | 4.685681           | 5.507266           | 3.537339           | 0.919618           | 1.112911           | 1.017822           |
| -25%                 | 6.426354           | 4.76875            | 5.591997           | 3.6177             | 0.934095           | 1.138959           | 1.041644           |
| -20%                 | 6.523634           | 4.851819           | 5.676727           | 3.69806            | 0.948572           | 1.165006           | 1.065466           |
| -15%                 | 6.620915           | 4.934888           | 5.761458           | 3.77842            | 0.963048           | 1.191053           | 1.089288           |
| -10%                 | 6.718195           | 5.017957           | 5.846189           | 3.85878            | 0.977525           | 1.2171             | 1.113109           |
| -5%                  | 6.815476           | 5.101026           | 5.93092            | 3.93914            | 0.992002           | 1.243148           | 1.136931           |
| 0%                   | 6.912756           | 5.184095           | 6.015651           | 4.019501           | 1.006478           | 1.269195           | 1.160753           |
| Fitting              | $y=1.9456x+6.9128$ | $y=1.6614x+5.1841$ | $y=1.6946x+6.0157$ | $y=1.6072x+4.0195$ | $y=0.2895x+1.0065$ | $y=0.5210x+1.2692$ | $y=0.4764x+1.1608$ |
| R <sup>2</sup>       | 1                  | 1                  | 1                  | 1                  | 1                  | 1                  | 1                  |

**Table S26 Data and fitting results for sensitivity of concrete usage variation to CED (TJ/MW) of Civil Works.**

| PV systems<br>change | P20MW2013A         | P50MW2013B         | P50MW2013C         | P25MW2016          | P50MW2021          | P500MW2023         |
|----------------------|--------------------|--------------------|--------------------|--------------------|--------------------|--------------------|
| -50%                 | 2.407522           | 1.73541            | 2.080384           | 1.309192           | 0.394933           | 0.459245           |
| -45%                 | 2.433756           | 1.757883           | 2.103301           | 1.330828           | 0.398966           | 0.466835           |
| -40%                 | 2.45999            | 1.780357           | 2.126217           | 1.352465           | 0.402999           | 0.474424           |
| -35%                 | 2.486224           | 1.802831           | 2.149134           | 1.374102           | 0.407032           | 0.482013           |
| -30%                 | 2.512458           | 1.825304           | 2.17205            | 1.395738           | 0.411065           | 0.489603           |
| -25%                 | 2.538692           | 1.847778           | 2.194966           | 1.417375           | 0.415098           | 0.497192           |
| -20%                 | 2.564926           | 1.870252           | 2.217883           | 1.439012           | 0.419131           | 0.504781           |
| -15%                 | 2.59116            | 1.892726           | 2.240799           | 1.460648           | 0.423165           | 0.512371           |
| -10%                 | 2.617394           | 1.915199           | 2.263715           | 1.482285           | 0.427198           | 0.51996            |
| -5%                  | 2.643628           | 1.937673           | 2.286631           | 1.503921           | 0.431231           | 0.52755            |
| 0%                   | 2.669862           | 1.960147           | 2.309548           | 1.525558           | 0.435264           | 0.535139           |
| Fitting              | $y=0.5247x+2.6699$ | $y=0.4495x+1.9602$ | $y=0.4583x+2.3096$ | $y=0.4327x+1.5256$ | $y=0.0807x+0.4353$ | $y=0.1518x+0.5351$ |
| R <sup>2</sup>       | 1                  | 1                  | 1                  | 1                  | 1                  | 1                  |

**Table S27 Data for sensitivity of disposal scenarios to GHG (gCO<sub>2</sub>-eq/kWh) of PV Modules.**

| PV systems<br>scenarios | P20MW2013A | P50MW2013B | P50MW2013C | P25MW2016 | P50MW2021 | P500MW2023 | P500MW2023+ESS |
|-------------------------|------------|------------|------------|-----------|-----------|------------|----------------|
| NRS                     | 55.05569   | 48.79905   | 48.88771   | 39.13776  | 32.75131  | 35.96748   | 35.22166       |
| MSWS of CN              | 54.67909   | 48.42182   | 48.51633   | 38.83596  | 32.53984  | 35.76216   | 35.0317        |
| RS                      | 54.44252   | 48.19038   | 48.29073   | 38.65465  | 32.43266  | 35.64542   | 34.92247       |

**Table S28 Data for sensitivity of disposal scenarios to EPBT (years) of PV Modules.**

| PV systems<br>scenarios | P20MW2013A | P50MW2013B | P50MW2013C | P25MW2016 | P50MW2021 | P500MW2023 | P500MW2023+ESS |
|-------------------------|------------|------------|------------|-----------|-----------|------------|----------------|
| NRS                     | 4.699174   | 4.269885   | 4.273006   | 3.383406  | 3.155547  | 3.465853   | 3.320307       |
| MSWS of CN              | 4.694556   | 4.265605   | 4.268978   | 3.380411  | 3.154693  | 3.464244   | 3.318775       |
| RS                      | 4.693645   | 4.264736   | 4.26817    | 3.37977   | 3.154426  | 3.463871   | 3.318425       |

**Table S29 Data for sensitivity of disposal scenarios to EROI of PV Modules.**

| PV<br>systems<br>scenarios | P20MW2013A | P50MW2013B | P50MW2013C | P25MW2016 | P50MW2021 | P500MW2023 | P500MW2023+ESS |
|----------------------------|------------|------------|------------|-----------|-----------|------------|----------------|
| NRS                        | 4.871173   | 5.329142   | 5.325343   | 6.753027  | 7.43484   | 6.85571    | 7.040849       |
| MSWS of CN                 | 4.875859   | 5.33436    | 5.330246   | 6.758907  | 7.436833  | 6.858869   | 7.044076       |
| RS                         | 4.876785   | 5.335421   | 5.331231   | 6.760166  | 7.437455  | 6.859601   | 7.044812       |

**Table S30 Data and fitting results for sensitivity of curtailment rate variation to GHG (gCO<sub>2</sub>-eq/kWh) of PV systems.**

| PV systems<br>rate/% | P20MW2013A           | P50MW2013B           | P50MW2013C           | P25MW2016            | P50MW2021            | P500MW2023           | P500MW2023+ESS      |
|----------------------|----------------------|----------------------|----------------------|----------------------|----------------------|----------------------|---------------------|
| 0                    | 50.30476             | 44.54808             | 44.63503             | 35.72908             | 29.93666             | 32.90118             | 32.45098            |
| 1%                   | 50.81289             | 44.99806             | 45.08589             | 36.08998             | 30.23905             | 33.23352             | 32.75258            |
| 2%                   | 51.33139             | 45.45722             | 45.54595             | 36.45825             | 30.54761             | 33.57264             | 33.05984            |
| 3%                   | 51.86058             | 45.92585             | 46.01549             | 36.8341              | 30.86253             | 33.91875             | 33.37292            |
| 4%                   | 52.40079             | 46.40425             | 46.49482             | 37.21779             | 31.18402             | 34.27207             | 33.69199            |
| 5%                   | 52.95238             | 46.89271             | 46.98424             | 37.60956             | 31.51227             | 34.63283             | 34.01722            |
| 6%                   | 53.5157              | 47.39157             | 47.48407             | 38.00966             | 31.84751             | 35.00126             | 34.34879            |
| 7%                   | 54.09114             | 47.90116             | 47.99465             | 38.41837             | 32.18995             | 35.37762             | 34.68688            |
| 8%                   | 54.67909             | 48.42182             | 48.51633             | 38.83596             | 32.53984             | 35.76216             | 35.0317             |
| 9%                   | 55.27996             | 48.95393             | 49.04948             | 39.26273             | 32.89742             | 36.15515             | 35.38344            |
| 10%                  | 55.89418             | 49.49786             | 49.59448             | 39.69898             | 33.26295             | 36.55687             | 35.74232            |
| Fitting              | $y=55.8495x+50.2187$ | $y=49.4583x+44.4719$ | $y=49.5549x+44.5587$ | $y=39.6673x+35.6680$ | $y=33.2364x+29.8854$ | $y=36.5277x+32.8449$ | $y=32.8913x+32.404$ |
| R <sup>2</sup>       | 0.9991               | 0.991                | 0.9991               | 0.9991               | 0.9991               | 1                    | 0.9993              |

**Table S31 Data and fitting results for sensitivity of curtailment rate variation to EPBT (years) of PV systems.**

| PV systems<br>rate/% | P20MW2013A         | P50MW2013B         | P50MW2013C         | P25MW2016          | P50MW2021          | P500MW2023         | P500MW2023+ESS     |
|----------------------|--------------------|--------------------|--------------------|--------------------|--------------------|--------------------|--------------------|
| 0                    | 4.310529           | 3.916811           | 3.919882           | 3.105262           | 2.900147           | 3.184869           | 3.076025           |
| 1%                   | 4.355138           | 3.957007           | 3.960108           | 3.137224           | 2.929614           | 3.217322           | 3.104425           |
| 2%                   | 4.400658           | 3.998022           | 4.001167           | 3.169838           | 2.959682           | 3.250437           | 3.13335            |
| 3%                   | 4.447116           | 4.040303           | 4.043501           | 3.203124           | 2.990369           | 3.284235           | 3.162814           |
| 4%                   | 4.494542           | 4.083486           | 4.086718           | 3.237104           | 3.02182            | 3.318736           | 3.192832           |
| 5%                   | 4.542967           | 4.127578           | 4.130844           | 3.2718             | 3.053989           | 3.353965           | 3.223421           |
| 6%                   | 4.592421           | 4.172608           | 4.175909           | 3.307233           | 3.086843           | 3.389942           | 3.254596           |
| 7%                   | 4.64294            | 4.218607           | 4.221943           | 3.343429           | 3.120403           | 3.426694           | 3.286375           |
| 8%                   | 4.694556           | 4.265605           | 4.268978           | 3.380411           | 3.154693           | 3.464244           | 3.318775           |
| 9%                   | 4.747308           | 4.313637           | 4.317047           | 3.418206           | 3.189736           | 3.50262            | 3.351814           |
| 10%                  | 4.801231           | 4.362736           | 4.366183           | 3.456841           | 3.225558           | 3.541848           | 3.385513           |
| Fitting              | $y=4.9031x+4.3030$ | $y=4.4588x+3.9095$ | $y=4.4625x+3.9125$ | $y=3.5130x+3.0999$ | $y=3.2524x+2.8949$ | $y=3.5669x+3.1794$ | $y=3.0929x+3.0717$ |
| R <sup>2</sup>       | 0.9991             | 0.9991             | 0.9991             | 0.9991             | 0.9991             | 0.9991             | 0.9993             |

**Table S32 Data and fitting results for sensitivity of curtailment rate variation to EROI of PV systems.**

| PV<br>systems<br>rate/% | P20MW2013A          | P50MW2013B          | P50MW2013C          | P25MW2016           | P50MW2021           | P500MW2023          | P500MW2023+ESS      |
|-------------------------|---------------------|---------------------|---------------------|---------------------|---------------------|---------------------|---------------------|
| 0                       | 5.299847            | 5.798217            | 5.793746            | 7.346638            | 8.083514            | 7.455292            | 7.604269            |
| 1%                      | 5.246848            | 5.740235            | 5.735809            | 7.273171            | 8.002679            | 7.380739            | 7.534245            |
| 2%                      | 5.19385             | 5.682253            | 5.677871            | 7.199705            | 7.921843            | 7.306186            | 7.464221            |
| 3%                      | 5.140851            | 5.624271            | 5.619934            | 7.126239            | 7.841008            | 7.231633            | 7.394197            |
| 4%                      | 5.087853            | 5.566289            | 5.561996            | 7.052772            | 7.760173            | 7.15708             | 7.324173            |
| 5%                      | 5.034854            | 5.508307            | 5.504059            | 6.979306            | 7.679338            | 7.082528            | 7.254149            |
| 6%                      | 4.981856            | 5.450324            | 5.446121            | 6.905839            | 7.598503            | 7.007975            | 7.184125            |
| 7%                      | 4.928857            | 5.392342            | 5.388184            | 6.832373            | 7.517668            | 6.933422            | 7.114101            |
| 8%                      | 4.875859            | 5.33436             | 5.330246            | 6.758907            | 7.436833            | 6.858869            | 7.044076            |
| 9%                      | 4.82286             | 5.276378            | 5.272309            | 6.68544             | 7.355997            | 6.784316            | 6.974052            |
| 10%                     | 4.769862            | 5.218396            | 5.214371            | 6.611974            | 7.275162            | 6.709763            | 6.904028            |
| Fitting                 | $y=-5.2999x+5.2999$ | $y=-5.7982x+5.7982$ | $y=-5.7928x+5.7938$ | $y=-7.3466x+7.3466$ | $y=-8.0835x+8.0835$ | $y=-7.4553x+7.4553$ | $y=-7.0024x+7.6043$ |
| R <sup>2</sup>          | 1                   | 1                   | 1                   | 1                   | 1                   | 1                   | 1                   |

**Table S33 Data and fitting results for sensitivity of performance ratio variation to GHG (gCO<sub>2</sub>-eq/kWh) of PV systems.**

| PV systems<br>ratio/% | P20MW2013A        | P50MW2013B        | P50MW2013C        | P25MW2016         | P50MW2021         | P500MW2023        | P500MW2023+ESS         |
|-----------------------|-------------------|-------------------|-------------------|-------------------|-------------------|-------------------|------------------------|
| 76%                   | 57.48499          | 50.90663          | 51.00599          | 40.98215          | 35.69107          | 38.72665          | 37.66885               |
| 78%                   | 56.01101          | 49.60133          | 49.69814          | 39.93133          | 34.77592          | 37.73366          | 36.78965               |
| 80%                   | 54.61074          | 48.3613           | 48.45569          | 38.93305          | 33.90652          | 36.79032          | 35.95055               |
| 82%                   | 53.27877          | 47.18175          | 47.27384          | 37.98346          | 33.07953          | 35.89299          | 35.14888               |
| 84%                   | 52.01023          | 46.05838          | 46.14828          | 37.07909          | 32.29192          | 35.0384           | 34.38218               |
| 86%                   | 50.80069          | 44.98725          | 45.07506          | 36.21679          | 31.54095          | 34.22355          | 33.64821               |
| 88%                   | 49.64613          | 43.96481          | 44.05063          | 35.39368          | 30.82411          | 33.44574          | 32.94493               |
| 90%                   | 48.54288          | 42.98782          | 43.07172          | 34.60715          | 30.13913          | 32.70251          | 32.27044               |
| 92%                   | 47.4876           | 42.0533           | 42.13538          | 33.85482          | 29.48393          | 31.99158          | 31.62302               |
| 94%                   | 46.47722          | 41.15855          | 41.23888          | 33.13451          | 28.85661          | 31.31091          | 31.00106               |
| 96%                   | 45.50895          | 40.30108          | 40.37974          | 32.44421          | 28.25543          | 30.6586           | 30.4031                |
| 98%                   | 44.5802           | 39.47861          | 39.55566          | 31.78208          | 27.67879          | 30.03291          | 29.82776               |
| 100%                  | 43.68859          | 38.68904          | 38.76455          | 31.14644          | 27.12521          | 29.43226          | 29.2738                |
| Fitting               | $y=43.6886x^{-1}$ | $y=38.6890x^{-1}$ | $y=38.7646x^{-1}$ | $y=31.1464x^{-1}$ | $y=27.1252x^{-1}$ | $y=29.4323x^{-1}$ | $y=29.2873x^{-0.9185}$ |
| R <sup>2</sup>        | 1                 | 1                 | 1                 | 1                 | 1                 | 1                 | 1                      |

**Table S34 Data and fitting results for sensitivity of performance ratio variation to EPBT (years) of PV systems.**

| PV systems<br>ratio/% | P20MW2013A            | P50MW2013B            | P50MW2013C            | P25MW2016             | P50MW2021             | P500MW2023            | P500MW2023+ESS        |
|-----------------------|-----------------------|-----------------------|-----------------------|-----------------------|-----------------------|-----------------------|-----------------------|
| 76%                   | 4.94089               | 4.4899                | 4.493446              | 3.570481              | 3.463517              | 3.753727              | 3.566219              |
| 78%                   | 4.811488              | 4.372075              | 4.37553               | 3.477419              | 3.37383               | 3.656762              | 3.483792              |
| 80%                   | 4.688556              | 4.260142              | 4.26351               | 3.389009              | 3.288628              | 3.564644              | 3.405061              |
| 82%                   | 4.571621              | 4.153668              | 4.156955              | 3.304913              | 3.207583              | 3.47702               | 3.329782              |
| 84%                   | 4.460254              | 4.052265              | 4.055473              | 3.224821              | 3.130396              | 3.393569              | 3.257735              |
| 86%                   | 4.354067              | 3.956041              | 3.959142              | 3.148454              | 3.0568                | 3.313999              | 3.188714              |
| 88%                   | 4.252707              | 3.864711              | 3.867741              | 3.075559              | 2.986625              | 3.238046              | 3.122533              |
| 90%                   | 4.155851              | 3.777439              | 3.780402              | 3.005903              | 2.919877              | 3.165468              | 3.059021              |
| 92%                   | 4.063207              | 3.693963              | 3.696861              | 2.939783              | 2.856031              | 3.096047              | 2.998027              |
| 94%                   | 3.97477               | 3.614038              | 3.616874              | 2.876524              | 2.794902              | 3.029579              | 2.939637              |
| 96%                   | 3.890648              | 3.537443              | 3.540221              | 2.8159                | 2.736321              | 2.966039              | 2.883468              |
| 98%                   | 3.80996               | 3.463975              | 3.466696              | 2.757751              | 2.68013               | 2.905224              | 2.829395              |
| 100%                  | 3.732499              | 3.393446              | 3.396112              | 2.701928              | 2.626187              | 2.846841              | 2.777304              |
| Fitting               | $y=3.7316x^{-1.0228}$ | $y=3.3928x^{-1.0201}$ | $y=3.3955x^{-1.0201}$ | $y=2.7013x^{-1.0162}$ | $y=2.6258x^{-1.0086}$ | $y=2.8466x^{-1.0080}$ | $y=2.7785x^{-0.9111}$ |
| R <sup>2</sup>        | 1                     | 1                     | 1                     | 1                     | 1                     | 1                     | 1                     |

**Table S35 Data and fitting results for sensitivity of performance ratio variation to EROI of PV systems.**

| PV systems<br>ratio/% | P20MW2013A  | P50MW2013B  | P50MW2013C  | P25MW2016   | P50MW2021 | P500MW2023 | P500MW2023+ESS |
|-----------------------|-------------|-------------|-------------|-------------|-----------|------------|----------------|
| 76%                   | 4.637863    | 5.073985    | 5.070072    | 6.404949    | 6.780222  | 6.333828   | 6.55093        |
| 78%                   | 4.759912    | 5.20751     | 5.203495    | 6.5735      | 6.958649  | 6.500507   | 6.707484       |
| 80%                   | 4.881961    | 5.341036    | 5.336917    | 6.742052    | 7.137075  | 6.667187   | 6.864039       |
| 82%                   | 5.00401     | 5.474562    | 5.47034     | 6.910603    | 7.315502  | 6.833867   | 7.020593       |
| 84%                   | 5.126059    | 5.608088    | 5.603763    | 7.079154    | 7.493929  | 7.000547   | 7.177148       |
| 86%                   | 5.248108    | 5.741614    | 5.737186    | 7.247705    | 7.672356  | 7.167226   | 7.333702       |
| 88%                   | 5.370157    | 5.87514     | 5.870609    | 7.416257    | 7.850783  | 7.333906   | 7.490257       |
| 90%                   | 5.492206    | 6.008666    | 6.004032    | 7.584808    | 8.02921   | 7.500586   | 7.646811       |
| 92%                   | 5.614256    | 6.142192    | 6.137455    | 7.753359    | 8.207637  | 7.667265   | 7.803366       |
| 94%                   | 5.736305    | 6.275718    | 6.270878    | 7.921911    | 8.386064  | 7.833945   | 7.95992        |
| 96%                   | 5.858354    | 6.409244    | 6.404301    | 8.090462    | 8.564491  | 8.000625   | 8.116475       |
| 98%                   | 5.980403    | 6.54277     | 6.537724    | 8.259013    | 8.742917  | 8.167304   | 8.27303        |
| 100%                  | 6.102452    | 6.676295    | 6.671147    | 8.427564    | 8.921344  | 8.333984   | 8.429584       |
| Fitting               | $y=6.1025x$ | $y=6.6712x$ | $y=6.6763x$ | $y=8.4276x$ | $y=x$     | $y=x$      | $y=x$          |
| R <sup>2</sup>        | 1           | 1           | 1           | 1           | 1         | 1          | 1              |

**Table S36 Data and fitting results for sensitivity of lifetime variation to GHG (gCO<sub>2</sub>-eq/kWh) of PV systems.**

| PV systems<br>lifetime/years | P20MW2013A              | P50MW2013B              | P50MW2013C              | P25MW2016               | P50MW2021               | P500MW2023              | P500MW2023+ESS          |
|------------------------------|-------------------------|-------------------------|-------------------------|-------------------------|-------------------------|-------------------------|-------------------------|
| 25                           | 54.67909                | 48.42182                | 48.51633                | 38.83596                | 32.53984                | 35.76216                | 35.0317                 |
| 26                           | 53.04269                | 46.85386                | 46.91022                | 37.64514                | 31.42337                | 34.557                  | 33.9503                 |
| 27                           | 51.52975                | 45.40346                | 45.42422                | 36.54348                | 30.39039                | 33.44192                | 32.94376                |
| 28                           | 50.12717                | 44.05812                | 44.04555                | 35.52153                | 29.43196                | 32.40726                | 32.00463                |
| 29                           | 48.82368                | 42.80705                | 42.76321                | 34.57115                | 28.54037                | 31.44471                | 31.12643                |
| 30                           | 47.60947                | 41.6409                 | 41.56762                | 33.68527                | 27.70895                | 30.54707                | 30.3035                 |
| 31                           | 46.476                  | 40.5515                 | 40.45044                | 32.85773                | 26.93189                | 29.70806                | 29.53085                |
| 32                           | 45.4158                 | 39.53173                | 39.40439                | 32.08314                | 26.20408                | 28.92219                | 28.80405                |
| 33                           | 44.42228                | 38.5753                 | 38.42304                | 31.35673                | 25.52106                | 28.18464                | 28.11922                |
| 34                           | 43.48964                | 37.67666                | 37.50073                | 30.6743                 | 24.87889                | 27.49114                | 27.47288                |
| 35                           | 42.61272                | 36.83092                | 36.63243                | 30.03215                | 24.27407                | 26.83792                | 26.86193                |
| 36                           | 41.78694                | 36.03369                | 35.8137                 | 29.42695                | 23.70349                | 26.22163                | 26.28359                |
| 37                           | 41.00822                | 35.28108                | 35.04053                | 28.85576                | 23.16438                | 25.63929                | 25.73536                |
| 38                           | 40.27289                | 34.56961                | 34.30937                | 28.31591                | 22.65427                | 25.08822                | 25.21502                |
| 39                           | 39.57767                | 33.89614                | 33.61702                | 27.80504                | 22.17092                | 24.56601                | 24.72053                |
| 40                           | 38.9196                 | 33.25785                | 32.96059                | 27.32101                | 21.71234                | 24.0705                 | 24.25005                |
| Fitting                      | $y=563.7400x^{-0.7260}$ | $y=637.4574x^{-0.8017}$ | $y=688.2243x^{-0.8248}$ | $y=433.7662x^{-0.7507}$ | $y=521.7764x^{-0.8627}$ | $y=540.3175x^{-0.8443}$ | $y=436.3857x^{-0.7840}$ |
| R <sup>2</sup>               | 0.9995                  | 0.9997                  | 0.9998                  | 0.9996                  | 0.9999                  | 0.9999                  | 0.9999                  |

**Table S37 Data and fitting results for sensitivity of lifetime variation to EPBT (years) of PV systems.**

| PV systems<br>lifetime/years | P20MW2013A        | P50MW2013B         | P50MW2013C         | P25MW2016          | P50MW2021          | P500MW2023         | P500MW2023+ESS     |
|------------------------------|-------------------|--------------------|--------------------|--------------------|--------------------|--------------------|--------------------|
| 25                           | 4.694556          | 4.265605           | 4.268978           | 3.380411           | 3.154693           | 3.464244           | 3.318775           |
| 26                           | 4.712113          | 4.273516           | 4.274582           | 3.391663           | 3.15774            | 3.470283           | 3.324206           |
| 27                           | 4.72967           | 4.281427           | 4.280186           | 3.402914           | 3.160787           | 3.476323           | 3.329638           |
| 28                           | 4.747227          | 4.289338           | 4.285789           | 3.414166           | 3.163834           | 3.482362           | 3.33507            |
| 29                           | 4.764784          | 4.297249           | 4.291393           | 3.425417           | 3.16688            | 3.488402           | 3.340502           |
| 30                           | 4.782341          | 4.30516            | 4.296997           | 3.436669           | 3.169927           | 3.494441           | 3.345933           |
| 31                           | 4.799898          | 4.313071           | 4.302601           | 3.44792            | 3.172974           | 3.500481           | 3.351365           |
| 32                           | 4.817455          | 4.320982           | 4.308205           | 3.459172           | 3.176021           | 3.50652            | 3.356797           |
| 33                           | 4.835012          | 4.328892           | 4.313808           | 3.470423           | 3.179068           | 3.51256            | 3.362229           |
| 34                           | 4.852568          | 4.336803           | 4.319412           | 3.481675           | 3.182115           | 3.518599           | 3.36766            |
| 35                           | 4.870125          | 4.344714           | 4.325016           | 3.492926           | 3.185162           | 3.524639           | 3.373092           |
| 36                           | 4.887682          | 4.352625           | 4.33062            | 3.504178           | 3.188209           | 3.530678           | 3.378524           |
| 37                           | 4.905239          | 4.360536           | 4.336224           | 3.515429           | 3.191256           | 3.536718           | 3.383956           |
| 38                           | 4.922796          | 4.368447           | 4.341827           | 3.526681           | 3.194303           | 3.542757           | 3.389387           |
| 39                           | 4.940353          | 4.376358           | 4.347431           | 3.537933           | 3.19735            | 3.548797           | 3.394819           |
| 40                           | 4.95791           | 4.384269           | 4.353035           | 3.549184           | 3.200397           | 3.554836           | 3.400251           |
| Fitting                      | $y=0.176x+4.2556$ | $y=0.0079x+4.0678$ | $y=0.0056x+4.1289$ | $y=0.0113x+3.0991$ | $y=0.0031x+3.0785$ | $y=0.0060x+3.3133$ | $y=0.0054x+3.1830$ |
| R <sup>2</sup>               | 1                 | 1                  | 1                  | 1                  | 1                  | 1                  | 1                  |

**Table S38 Data and fitting results for sensitivity of lifetime variation to EROI of PV systems.**

| PV systems<br>lifetime/years | P20MW2013A         | P50MW2013B         | P50MW2013C         | P25MW2016          | P50MW2021          | P500MW2023         | P500MW2023+ESS     |
|------------------------------|--------------------|--------------------|--------------------|--------------------|--------------------|--------------------|--------------------|
| 25                           | 4.875859           | 5.33436            | 5.330246           | 6.758907           | 7.436833           | 6.858869           | 7.044076           |
| 26                           | 5.031476           | 5.515435           | 5.514093           | 6.979083           | 7.703675           | 7.103606           | 7.273671           |
| 27                           | 5.184511           | 5.694257           | 5.695869           | 7.196003           | 7.968221           | 7.346171           | 7.501273           |
| 28                           | 5.334993           | 5.870839           | 5.875583           | 7.409699           | 8.230478           | 7.586575           | 7.726894           |
| 29                           | 5.482948           | 6.045192           | 6.053243           | 7.620203           | 8.490453           | 7.824829           | 7.950542           |
| 30                           | 5.628404           | 6.217328           | 6.228856           | 7.827545           | 8.748152           | 8.060944           | 8.172227           |
| 31                           | 5.771389           | 6.38726            | 6.402431           | 8.031755           | 9.003581           | 8.294932           | 8.391958           |
| 32                           | 5.911927           | 6.554998           | 6.573976           | 8.232864           | 9.256748           | 8.526802           | 8.609746           |
| 33                           | 6.050046           | 6.720556           | 6.743497           | 8.430901           | 9.507658           | 8.756566           | 8.825599           |
| 34                           | 6.185772           | 6.883944           | 6.911002           | 8.625896           | 9.756317           | 8.984235           | 9.039526           |
| 35                           | 6.319128           | 7.045174           | 7.0765             | 8.817877           | 10.00273           | 9.209819           | 9.251538           |
| 36                           | 6.450142           | 7.204258           | 7.239998           | 9.006873           | 10.24691           | 9.433329           | 9.461642           |
| 37                           | 6.578836           | 7.361207           | 7.401503           | 9.192913           | 10.48886           | 9.654776           | 9.669849           |
| 38                           | 6.705235           | 7.516032           | 7.561024           | 9.376023           | 10.72858           | 9.874169           | 9.876167           |
| 39                           | 6.829364           | 7.668745           | 7.718566           | 9.556232           | 10.96609           | 10.09152           | 10.08061           |
| 40                           | 6.951246           | 7.819356           | 7.874139           | 9.733566           | 11.20138           | 10.30684           | 10.28317           |
| Fitting                      | $y=0.1383x+1.4616$ | $y=0.1656x+1.2319$ | $y=0.1696x+1.1265$ | $y=0.1982x+1.8576$ | $y=0.2510x+1.2027$ | $y=0.2298x+1.1501$ | $y=0.2159x+1.6803$ |
| R <sup>2</sup>               | 0.9987             | 0.9993             | 0.9994             | 0.9990             | 0.9997             | 0.9997             | 0.9997             |

## References

- 1 M. J. de Wild-Scholten, Energy payback time and carbon footprint of commercial photovoltaic systems, *Sol. Energy Mater. Sol. Cells*, 2013, **119**, 296-305, DOI: 10.1016/j.solmat.2013.08.037.
- 2 A. Beylot, J. Payet, C. Puech, N. Adra, P. Jacquin, I. Blanc and D. Beloin-Saint-Pierre, Environmental impacts of large-scale grid-connected ground-mounted PV installations, *Renew. Energ.*, 2014, **61**, 2-6, DOI: 10.1016/j.renene.2012.04.051.
- 3 M. Yu and A. Halog, Solar Photovoltaic Development in Australia-A Life Cycle Sustainability Assessment Study, *Sustainability*, 2015, **7**, 1213-1247, DOI: 10.3390/su7021213.
- 4 M. Ito, S. Lespinats, J. Merten, P. Malbranche and K. Kurokawa, Life cycle assessment and cost analysis of very large-scale PV systems and suitable locations in the world, *Prog. Photovoltaics*, 2016, **24**, 159-174, DOI: 10.1002/pip.2650.
- 5 G. Hou, H. Sun, Z. Jiang, Z. Pan, Y. Wang, X. Zhang, Y. Zhao and Q. Yao, Life cycle assessment of grid-connected photovoltaic power generation from crystalline silicon solar modules in China, *Appl. Energy*, 2016, **164**, 882-890, DOI: 10.1016/j.apenergy.2015.11.023.
- 6 P. Wu, X. Ma, J. Ji and Y. Ma, Review on Life Cycle Assessment of Greenhouse Gas Emission Profit of Solar Photovoltaic Systems, *Energy Procedia*, 2017, **105**, 1289-1294, DOI: 10.1016/j.egypro.2017.03.460.
- 7 Z. Q. Yu, W. H. Ma, K. Q. Xie, G. Q. Lv, Z. J. Chen, J. J. Wu and J. Yu, Life cycle assessment of grid-connected power generation from metallurgical route multi-crystalline silicon photovoltaic system in China, *Appl. Energy*, 2017, **185**, 68-81, DOI: 10.1016/j.apenergy.2016.10.051.
- 8 G. Constantino, M. Freitas, N. Fidelis and M. G. Pereira, Adoption of Photovoltaic Systems Along a Sure Path: A Life-Cycle Assessment (LCA) Study Applied to the Analysis of GHG Emission Impacts, *Energies*, 2018, **11**, 28, DOI: 10.3390/en11102806.
- 9 S. K. Cromratie Clemons, C. R. Salloum, K. G. Herdegen, R. M. Kamens and S. H. Gheewala, Life cycle assessment of a floating photovoltaic system and feasibility for application in Thailand, *Renew. Energ.*, 2021, **168**, 448-462, DOI: 10.1016/j.renene.2020.12.082.
- 10 H. S. Schultz and M. Carvalho, Design, Greenhouse Emissions, and Environmental Payback of a Photovoltaic Solar Energy System, *Energies*, 2022, **15**, 24, DOI: 10.3390/en15166098.
- 11 M. C. Pamponet, H. L. Maranduba, J. A. D. Neto and L. B. Rodrigues, Energy balance and carbon footprint of very large-scale photovoltaic power plant, *Int. J. Energy Res.*, 2022, **46**, 6901-6918, DOI: 10.1002/er.7529.
- 12 A. H. Mohd Nordin, S. I. Sulaiman, S. Shaari and R. F. Mustapa, Energy and environmental impacts of a 37.57 MW dc ground-mounted large-scale photovoltaic system in Malaysia: A life-cycle approach, *J. Clean. Prod.*, 2022, **335**, 130326, DOI: 10.1016/j.jclepro.2021.130326.
- 13 A. Muller, L. Friedrich, C. Reichel, S. Herceg, M. Mittag and D. H. Neuhaus, A comparative life cycle assessment of silicon PV modules: Impact of module design, manufacturing location and inventory, *Sol. Energy Mater. Sol. Cells*, 2021, **230**, 13, DOI: 10.1016/j.solmat.2021.111277.
- 14 WHAT ARE THE IMPACTS OF SHIFTING SOLAR LIFETIME FROM 25 TO 35 YEARS?, <https://www.k2management.com/news/shifting-solar-lifetime-to-35-years>, (accessed May 28, 2020).
- 15 A. B. Paç and A. Gok, Assessing the Environmental Benefits of Extending the Service Lifetime of Solar Photovoltaic Modules, 2024, **8**, 2300245, DOI: <https://doi.org/10.1002/gch2.202300245>.
- 16 Y. Zhang, M. Kim, L. Wang, P. Verlinden and B. Hallam, Design considerations for multi-terawatt scale manufacturing of existing and future photovoltaic technologies: challenges and opportunities related to silver, indium and bismuth consumption, *Energy & Environmental Science*, 2021, **14**, 5587-5610, DOI: 10.1039/D1EE01814K.
- 17 China PV Industry development roadmap (2023-2024),

<https://www.ntsibpv.com/Public/Admin/20240312161334132537.pdf>, (accessed March 12, 2024).
